# Supplementary material for: Construction of a high-density genetic map and dissection of genetic architecture of six agronomic traits in tobacco (Nicotiana tabacum L.)
Source: Front Plant Sci. 2023 Feb 15;14:1126529. doi: 10.3389/fpls.2023.1126529 (PMC9975568; doi:10.3389/fpls.2023.1126529)
Supplement: Supplementary file 1 [file Table_1.xlsx]

## Sheet: 1SSR
Supplementary Table 1 SSR marker with primers
MarkerID	Left Sequence of primer	Right Sequence of primer
PT20213	TGTGGAGCTCCTTTCTTTGC	TCAAATCAACAACAAATCCAAT
PT20372	CCTTTACCTCCGACAATTTCA	TAGGCTGGATAGGTGCCTCA
PT30028	AAACTTGAAGCAGAGACGGC	GCACATGCGGATCTTGATTT
PT30038	GGCCAGTATTACCTCGGTCC	TCCAGAACTAGGAGATAAGAGCAAA
PT30046	GATAGGTAGATTATCCTCTGCAACA	GGTGCTAGCAACATCATCAAA
PT30077	CTTCCTCTGCCACCTTTCAG	GCTTCCATAGTTGGTAAAGCCA
PT30160	GCCGAATTAAACCAACCAAA	ACCGGATTGCTTAATTGTCG
PT30243	TTTGGAATATGGTTAGAGCAAGA	GTTGTGCTAATTCTCGTGGAA
PT30274	TGACAGCTAAGCTAATAACAGTAAATG	GGACTTTGGAGTGTCAAATGC
PT30355	AAGCAGAGCATTAGATTGGAGAA	TCCGGATCATACATTGTTGG
PT30412	CATTTAGCCGGGAACATTCA	CATGGGATACACACGCAAAG
PT50062	AGGATCGAAATGAGATGAGAAG	GCAATTTGCTCTCTCCAGTTG
PT50064	AAACATTTGGGCGTTCCTTA	AGACGCTTGCTTGTATGTCAA
PT50082	ATCCCGGTGTGTAAAGCCTA	CCGATCCACAAGAAGGGAG
PT50120	CCATTCCCTTGCTTCACTCT	CCGGAGCTATTCCTCCTACC
PT50147	CAGTCGTCATGAGGCTTTCA	AGGAGATGGAAGTTGAGCCA
PT50153	CCACTTGGCAACCATAATGTC	TGAAGAAATATAATCCAGTGAGAGTCA
PT50230	TGATGTTGTAGGTGAGTCCCTC	TGCTTTGAGGTTTGTCATGC
PT50245	TCTAATTCAACTTTGGATCCATTT	CTTCTGCAGTTAGCCACCCT
PT50500	ATCGGCTTCATAAGGCAAGA	ACCTTTGCAAGGAGGTTTCA
PT50509	TTCTTTGGTGAGAAACTATTACTTCTT	TGAATAATCAAACGCTTGGAA
PT50544	AACAGGTTCCCTCTCTTCCC	CAGCAGAAAGATCAATCAGGG
PT50565	TCTGAAATTCAAGGTAGAGAGAGAG	GGTCGCCTTTATCCACTTCA
PT50604	CTTCTCCGTCGATATCCCAA	ACCCAGTCGAGAATGGTCAC
PT50647	GAGATTCCACAGCACACACC	CCCGTTGCATTTCATAATTGA
PT50655	TAATCCTGCATCTGCCATTG	CAAGGCAAGCGTTGACATAA
PT50748	CAGATATTAAACCAGCCTATGCAA	AGTCACAACGCAGCTAGCAA
PT50766	AAGGGTAAGGTCTGCGTACA	TCCTCACAATTTACTTCTTCGATTC
PT50813	CTTCATAGTCGACGCAAACG	AATGCATGCACCTTGTCGTA
PT50841	GATCTGCTGTGGCAAGTTCA	TGCTCAATAATCATCTCTCACAAA
PT50965	TGAAGGGAAATGATAATGTATAGTCAA	ATCATGTGGCCGAAATTGTT
PT51013	CCTGCGCCAGAAACATAAAT	CAACAATCTATAGCCGCTCTCA
PT51132	CGGAAAGATGCTCCAGGTAA	TCCATGGACAAAGAAGGTGA
PT51246	TTCCTGAATAAAGAACCAACTTCA	AGGTTTGAGAAGCCTGGGAT
PT51259	TAGGGAGCAAAGGCAGAAGA	CAGAACAACTTTGTAAGCGCA
PT51281	ATAGCATGTTGACCACCCGT	GCATATTCGAGATTTGAAATTTATG
PT51286	GGCATACACATGCAATACACG	GCACGTGCAAGATCAATTT
PT51310	AATGATTGCTTTCGCCTGAT	GGATCCTTGGCTAAAGGGAG
PT51339	TTTATTTGGGTCGATAATTGCT	GGCTAACGATATTTCACTAAGGACA
PT51393	GATCGGGCCATTACATGC	CGAACAACATTTCGCTAAGGA
PT51447	TCCATGTTGATACAGGAAAGGA	CAATTCTTATGTTCAAACGCC
PT51465	GCTACAACATTGTGTAACATACGGA	AACGCACGTGACGAGAAACT
PT51534	GATTGTCTCAGTCATGACATTGTT	TGGCGCAAATTTGTCGTAT
PT51555	TGCCACCCATAGACAGAAGA	TGTGTTTGAAGGAAGGAAGCA
PT51612	CGGCATATCTGAACCCTAGC	ATTTGGATGCGGAAGAAGTG
PT51794	CAATCCCTATTGATCGAGGC	TCGTTCAACATTTAACATAAATTATTC
PT51797	GGATTGCAATTTCGTGGAAG	GGAGCAGATGAAATGGGAAA
PT51813	TGTGATTGCTTGAAGACATAGGA	TCAAATTCCTCACCTGCTCTT
PT52007	TCAGGAACACAAATGAATATACGTC	TTCGTTAGAAGCTTTAGAGGACTCA
PT52059	GCACCTACCGCAGATTTGAA	GAGACGGACCTATTCTTTGGG
PT52296	CCCAATTACCATAAGCAAATCC	AACAGATAAAGGTCGGTAACCTG
PT52422	CATGAAAGAATATTCCAACCAAA	GCAGGATTGCTGTCAAGTCA
PT52444	CATCAATGCCCTCTCCAAA	CAAGTTCGCCTCATATTCATCA
PT52474	TCCTCGATTGAGTGGTTTCTC	AGGTTCAAATCGAATGTTGTTT
PT52570	TTCTTTCGATGTTACCCTTTCAA	TCACATTTGAAGATTTGGACAAT
PT52573	TGATCCGTTTGGAGAAGTCA	GGCGAAATTAGAAATTGTATCTCAA
PT52643	ACAGGGCATCAGAATTGTTT	CATGACATACTACAGGTGACCCA
PT52763	ATGGAAATAGCCTGCCTGAT	GCTAACCTAAATAGCCGCCA
PT52781	GCACACACAAACAGTCCCAC	AAAGCAGCAGTTCCAACAGG
PT52831	ATGTGATGGGCTTCGGTTAG	GCAACAGAGATCACCAGCAA
PT52889	CAAAGTATTGGGCTCCAGCTA	TGATATTTGAGTCCAAACGAAA
PT52944	AATCAACCACCAAAGATGCT	AGTACGACGAGATCCCACAAA
PT52957	TTTATTATAGTGGAATGCTAAAGGG	ATGCGAAGCGGAGAAATCTA
PT52975	TTGTATTCCAACTAAACGACCC	TGTCACCACAAACAGGATAATTT
PT53118	TCGACTTTGTATTCATGCTCTTT	GCTGTTGGGAGCCGTAAG
PT53140	TCACCTAAATAGCTGCCCAAA	AATAGCCGGATGGATTCACA
PT53143	ATTTGGACAGGGCTTTGTGT	AAGAGTGTTGCCTAAACGCC
PT53236	ATGAAAGTCGATCGGTCAGC	TCCCTGGATGGCTTCATATC
PT53239	TTGTCAATTGAACTTACGCGA	CACACAGTTTACATAACCAACAAGC
PT53345	GCATTAGTACACGATCGGAGTT	TCCAGGATTGCTAGTTTGCC
PT53353	CCCTGAAATTGTCTTGATTGTTT	AAAGATAAATGTGAATGAAAGCCA
PT53380	GCCATTTAGCAAGAAATGTCG	ATTCAGCTCATGGGTGATGG
PT53460	GGCACATAAATCCATTCACGA	CATTGTTATGGCACTGTCCG
PT53687	GCACATTTCATCCTTCCGTT	TCAATTTCGTTTGGTCCATTC
PT53701	CTCGGTCCATGTACACCCTT	GGCAGAATTGTTCGTTGGTT
PT53715	AAGACAGAGGCGAATCCAAA	TGACAAATGACTTTAGGGTGAAA
PT53825	GTCCAACGCACAGCACTCTA	ACCCTGCCAATGTGAAGGTA
PT53886	TCCATTGTGAAAGGTGTTTCTG	CATTGAGGGTGGATCGAACT
PT53993	ACCCAGAATTAGACTCTCATCG	TTGTCTTAGCTAGCCCTGCG
PT54014	TACCTCTATCGCGCATCGTA	GATGGAATAGTGGGAGACAACA
PT54093	TCACCCACACAATTTGACTTT	GGAATTGGCGTCTTCAACAT
PT54169	CCGTGCGTTACAATCCTTCT	AAGGTTGAAACACAATATCTCCA
PT54184	GCGCTTAGAGCTGCCAATAG	GGCTTAACCACAATGCCAAT
PT54212	AAATTTAGATTTGTTGACAGCATGA	TGTGACAATTGCACCAAAGAA
PT54242	ACACGCCAGTTATGGTTTCG	TCTCATTATTTAGAGACGGAGCAA
PT54246	GATTGCGTACACACCGGAC	GTGACCCGCACTCATACCTT
PT54421	TGGACCCAAAGTTTCATTTCA	GTGATCGGCCGTTTAACTGT
PT54454	CTCTGGAGCAATGGACCCTA	TGCCAATACAATTACCAAGTTGA
PT54613	GCCTATTACATGCGTCACTTCA	CGATCCCTTACTGCAGGTTT
PT54700	GCACTTGTTGGCCGAAATTA	AAACGTCGAAGGATGAAACTT
PT54719	GAGATTATATTGGGTAGGTTTGCATT	AAAGAAATCCAGCCTAGGTGAC
PT54818	TTTGAAATCGGCTATTTGTGC	TGGCCAGGGAACCAATTTAT
PT54819	GGGAAAGGATGAGGCAGATT	TCGTCGAAGTGAATTATGATCTTT
PT54845	GAGGAGAAGCCAAGGGTTTG	TAAACAGAACCTCACCGCAC
PT54902	TGTAAGGGTTGTTCCACATGA	TGGATCTCCAATTTCCACTTC
PT54914	CCGAAATAGCCATTTACCCA	TGAGGTCTCAGCAATAATTTATGTTT
PT54982	TGAACCCTTCTTTGGGTCTG	AGCCGGTCGATTTGTTATTT
PT54984	ATATTGCCACGCCATAGTCC	TATGCAGTGGCTGATCCAAG
PT54990	TGGAAAGGCGGCTATACAT	TCGGTTATTAGGTCAAACATGG
PT55028	AAGGTGAAGTACATTTCTCAATAGCA	CCTTTACATTTCAATTCATCTCCA
PT55030	GGTTCACAGTTCAGAATTTACGC	GACAGAAAGAAAGACTCCGAAA
PT55076	CACTCCTTTGTAACGGCACC	CCATCCCATAAATAAATTCCAGC
PT55077	GCCTATGCACCAACGGTC	GCCCGTACCAGAAATTATTTACA
PT55187	AATCAACGCGTCTTCTATTTATTATT	TCGTAGATCAAATGGATACGTAAA
PT55242	GCATCATGTGCAGAAACGAA	TGTGGAGGAAAGATGCAGTG
PT55392	CATAGAATATAAACTCGCCACAAA	AAAGTTAAAGTTATGCCGAGAGTG
PT55414	CACATTCACTTAACGTGTTCTCTTT	TGAAATCTTGAATGAATGAACAA
PT55428	AGATTGCATGCACGCTTAAA	ACTCCAGCATCCAACCAAAC
PT55437	TGGATGCACCTTCATATTATCG	ATGGATGTCGAAGCGGATAG
PT60038	CATCACCTTTCTCATTTCCACA	GCTGACAAGTGATGATTCTACCA
PT60053	TCCCAAAGAGTTCAATTGCC	CCTTGCCTGCTTGACTTTCT
PT60055	AAATTTCATGTCCGGTCAAA	TCCAATCTCAATCCTTTCGTG
PT60061	TGACCATATGTGCACTTGCC	TCAATTGATTTCCATTTCAATGAT
PT60105	GCATGGATTCACCTATTGGC	ATTGCACAAACATACGCAGC
PT60108	CCTTATTCATGGCATATCAAACA	AGCGTTCTGATCGAAGGACA
PT60180	GAGCATTAAGAATGAGGCGG	CGGGCTTTGGGTCTTATATC
PT60193	TGATGAAAGGTCATTTGGCA	ACACCAAATGAGTTGTCCGA
PT60263	AGCACAAGTGGAAGAGGCAT	TGGAACAGAAGTGTGGCTACT
PT60275	TGATGATGTCGCACTACACAA	CTTGCCGAGACACCTAAGGA
PT60345	AACCGAAACAAGGGAACAGA	GGGTATAGTAAATATCATGTGTTGCG
PT60379	AATTTGCACTCTGCGGACTC	CCCTGGGAGTTTCCATTTCT
PT60390	ACACACCGATCAGTTGTCCA	AGAGTGCCACACATCTGCTTT
PT60392	TATCAAGCGCGGATGGTAAT	CATTCTGAAATACAGCGGCA
PT60403	ATTCGCTACACGTGGGTTTC	AACGGCAGACATAAAGACGA
PT60424	GGCATTCGGAAAGTTCGATA	AGAGCACATTAAAGCACCGC
PT60455	CAGCAGGCTTGTTGTCTATCA	TTTAAAGTTGGCATCTCCCG
PT60486	AAGCACATACAAATCCAAATACAAA	TTGGTCTCCATTTCCTCCTC
PT60603	ACTGTTGGCTTTGTGTCACG	GCGTCCCTGGTTAGTTATGG
PT60614	TCCACCAGACAGCTTTAGGAA	CGCTTCTCTTGTTATTTGGGA
PT60624	TTGGGATCGTAACACCATCA	CAGGCCATACCTCGAATCTC
PT60653	AAATACCTGCGCGTGAAACT	AATTCCAAATGTCCATCCTTT
PT60665	CAGCAGTAAAGCGCATTGAA	TGCAACAAGAGAAAGACAAGG
PT60666	GATGGTTATGAGTTCGACCG	AGCGGATTCCGAATTTGATA
PT60694	TTGATTATCGATTCGCACAAA	GGTTCAGAGCAAAGAACGGA
PT60703	GGAGACGGGATCTCTTGTATCTT	GACTCTATCCAACACTACAGATCGAG
PT60739	CCCTCAATGTGGAGCAATTT	CAAACACTGGACTGGTCCCT
PT60754	GCTTTAACTCACCACGTCCAA	TTGCAATGAAACCCTGAATG
PT60766	TGAAATTGTTGAATTGACAGGAA	ATGATTCTGCATCCTGGGTT
PT60773	CATTTGAATTTCCTTCGCAGA	AGTTTGTGCAGTCGGAAAGG
PT60778	TGGTGGAAAGTGGAAACTCTT	AAGAAGGTAGCACCTCCATATCA
PT60795	ATGAAACTTTCGCATGGCTC	GCCAGCCAGGTGACAATAAT
PT60820	AGAACCCTTTCGACGTTGC	GCTCTAGCTGACACACCTGC
PT60821	CGTTTGATTAAAGTCGATTATATGTT	CCCACAAGGTGCAATCAAGT
PT60823	TGAGCCACAGTGCTTTATGC	TCCTCGAGAAGGTCAATGCT
PT60863	GGGATTGGGAAATGATCAAG	ACTACAAATTCACATCGCCC
PT60868	AACTCACGTTCCCTTTGCC	CAATCACCAATGAATGGAACC
PT60876	CATTCTCCTTAGGACTGGTTGC	TGGAGATGGCCAGGTCTATT
PT60882	CACCAACCCTCCCTCAATAA	TTGCAATGTGCATGTCATATACTC
PT60924	TGGGTGGGAAATTCAATATAGC	TGGCGTTTAAATTACGGAGG
PT60990	TCAACCCATAAAGCTGCTCC	AAAGAGACAAAGCAGGCACAA
PT61002	CCATATGAATTTACCGTCACCTT	TCAAAGTTTAGACAACTTCAGGCA
PT61040	TGTCTAGAGCTACACGTAGCAAGTT	CGAGTTGCATCCTTCGATCT
PT61043	GGATCAATACCCGGACTGTG	TTCGCATCTCAAGTGTCCAA
PT61058	AAGAAGACCAAACCAAATCGAC	CACCAACTAAGAGTGCAAACCA
PT61064	TTCACAAACTTCCATGCAGC	AACGATGAGGACCTGGCTTT
PT61098	ATGTCCAACGCTTTCTAGCC	TTTCCGCGTTATTAGATCATTT
PT61188	ATTTGGAAGTGAAGGCGTTG	TTCCTACTCACGTCATCTGAAA
PT61193	AATTTACACTTCACTAACCGAGATTC	CCTGACGATTGCTAAGAGCAT
PT61197	AATCTTTGGCTCCGTTCTCA	TGCATATGTTGTGATTTATCCTTTC
PT61201	CTGAGTTCCCAAAGGCCTAA	GGACGGCTGGAAATCTTTAAC
PT61218	TGGGCAAGTTACACATTTCG	TGCAGTTTCACCCATTACCA
PT61222	TCTGATTGTCTTCTTCTTTAATGGG	TTGTTTCCAGAATCCATTTGC
PT61239	CGACCTTGGTCTAGGCAGAT	CAATCCGAATGGCAGAATTT
PT61277	CGGAGGAAACAATGCAAGAT	TTGGTTGGTGGAATGGATTT
PT61299	CGGATGGCTACACAAATGAA	AATAATTATAGCGCTTAGCCAAAT
PT61396	AGGGAGGGAAAGGAAAGACA	AACATTGGTCGAAGAGCCAC
PT61397	GGGAAGGAAAGGGAGAGAGC	AACCCATTTAACAAGTGCGG
PT61401	TCCCATAAATCTTCACATCTTCAC	GCTCTCGTTTCCATCCTTCA
PT61433	TTAGGTTGTGACCTAATGCAAA	TTGTTCTTACAAATAACAGCGACA
PT61453	TCTTTGTGAAGATACAACGGCT	TGCCTGATGCCCTAAGTTCT
PT61494	GAATGACTTATTTGGCATTACGG	TGCTTTGTCAACTGCAGAGTTT
PT61496	GATTCAGCCCAAACATGGAC	GCTGCTCATGCACACTCTGT
PT61585	TTTCAATATGATTCGGCGGT	GGGATGGTGCTAACCTGCTA
PT61586	CAAGCAGTCGAGCGCTATAA	CGCTGCAACTTCAGTAACCA
PT61632	AGGCAATGTGCCTAGGGATT	GGCTACAAGAAGGAGGGCTT
PT61644	GCACTAGCCTCTCCTCTTCC	TTGGTATTACTGGGAAATGTGAAA
PT61647	CACACAAGAGGATAGCTAAAGAAGC	ATGAAGGCCAAATTGTTGGA
PT61650	TGGACGGAGTGTGTAGCAAT	TGTTATCACATGGCCAAAGTT
PT61656	AAGTCACACGGAGCTCGAAT	GCAAACCAGTTTGGCCTATG
TM10028	AAGCTCCCTACTTTCGTCAGC	AGAAGGCAATTCACGTCCAC
TM10179	ACAAGCTCTCGCAGGTATGT	TGGGAATGTCTACTGCACCA
TM10181	GGATCCCTAGGATGGCTCA	GCCATTATTAACGTGCCACA
TM10183	AAATGGCCCTCCCTCACTAT	ACAGAACTGAATGGGCGTTG
TM10323	GCTAGCTGATTGGGTTTGGT	TGGGCCTTGGAAATATAGGA
TM10359	GGGCGTGATCGGACTTTAT	CCCTGGCAAAAAGGAATGT
TM10380	CCTCTTAAACCCAACCGACA	GAGTTCTAGCCACGCCTCAC
TM10387	GGGGGAGCTAAGAAAGATTGA	AACGGACATAAGTGGGCTTG
TM10412	GGCGTGTAACCCAACCTAAA	TTCCACTGTTATGCCCGATT
TM10466	GCTTTGAGGGAACGAACAGT	CCAGTAAGGCACCAGATGCT
TM10502	GAGGAGGAGAAAGGCGATAAA	TCTTCGCTGGTCCTCGATAC
TM10525	AAAACCCTCCTGTGTGCCTA	GGATGCAACCCATAAATTCG
TM10532	GGGCCGTGATAGTCTCAAAC	GTCAGGGCCCTCCTGATTAT
TM10535	TAAGGGGGTCCTTTCCTGAT	CTTTCGTCCGGCTAGACAAG
TM10554	TGCTAATTCCCAGGAGAACG	CTTAAGAGCCCCGGACCTAC
TM10573	GGTGCGACAAAAATACACCA	GCCATGCAAATTTTTCTTCA
TM10574	TGGTCAATACCAAGCGACAG	ATGACGGATTCCCCTCCTAT
TM10577	TTTATTTTTGGGCTGTTGCTG	AAAGCTTTTGCATGCCATTT
TM10578	GCTGTTGCTGTGTTGGTTTC	GCTTTTGCATGCCATTTACA
TM10618	ACCATGAAAAATCCCACGAA	CCCTTGAAGATGTCAGTTTGG
TM10636	GGATGCACCCTACAACTTGA	GTGAACTCGATGCTCCCTCT
TM10650	AGCAGTTTGCACAAGAGCAG	ATGGGGAGAAGATGAAGCAA
TM10657	CCCCATTCTTTCACTTTCCA	TAGCTATCCCGAACGTGCTT
TM10664	CGATATGCATACATTATAGACGACA	CAGGTGATCCCCTCAAAAAT
TM10672	TCCTTCATCCGAAAGGTAGC	CAGCACCAACCACTTAACACA
TM10714	CGAGGCCATTTTCTCTCAAT	GGAACAGCCTTTTAGAGCTTGA
TM10728	TCTTGGCCAAATAAAGATGTCA	CGCTGCCGCTGAGTTATTAG
TM10829	GCCTACGGAGGCTTCTGTTT	GACATGCAGCTTCGACAAAT
TM10834	TCCAAATGACTTCGCACAAG	CGCAGATTCGACACAGGATA
TM10861	GCTGACAAGTGATGATTCTACCA	CACATCACCTTTCTCATTTCCA
TM10862	TGCGGAAGCAACAAATAGAC	GATCTGGGATTGTTCCCTTG
TM10881	TGCTTCCGATTTCACTTTACC	CGCAATCCGATTCACATATC
TM11044	CCTACCCACATTTTGGTATCC	GCTGCTGGGATTAGGTTCAA
TM11077	CCTCCAAGGCAAAAACTTGA	CTCGAAACCCAGACTGGAAA
TM11079	TTGCTAGGTTAAAGGTATGGTCA	TCGTGATGCATGATGTCAAA
TM11382	GTTTCATAGCAACGCCAACA	CAGGGTGCCCTATTTAGTCG
TM11383	AACCGCCGTTAGCAGCTTAT	GTGGGACAGTCTTTGCGATT
TM11425	GGATCCTCACCAAGCGATAA	TGTTCTGTGGATGGGGTTGT
TM11575	TTGCGGTCTTATTCCTCCTG	CGTTGACCACTTCCTCATCA
TM11594	GACACGCTTCATCATCCTCA	ACCCTTCACGTGGTCTGTTC
TM11614	AACCCAAACTAGTGCCTTCG	TGGTACATTTTGCCATTTACCT
TM11615	GTGGCTAAGGCAGGTCACTT	CGCAACGGATTGTGTGTACT
TM12044	AAAACCCCAAAGAAAGAGAACC	GAATCGTTGCTTCTGGTGTG
TM12659	TGAAACGGATGGAGTAATTATCAG	TCACCAAATTTTCTCCCTCAA
TM12897	TTCCAAAACTAGCAAAGCACA	TTTGAACTCGATTTACCGATGA
TM13493	CAACGCGGTAGCACAAAAT	GAGAAGAATCCGGGGAAAAG
TM13658	TGAATATGGACAAAAACGCAAG	GCATATGCATAAACAGTGGTGT
TM13677	CAAGTAGCTAAAAGCCATTTCCA	GAGCCCACAGGATAACAGGA
TM14213	TCCCGATTCAAATTTGTGAG	AACACAGCCCACCCTTTTTA
TM14255	ACTGTCCTCCCCCTGGTTAG	AGGGGGTGGTTCATTGATTT
TM15452	TATTCCCCAGCCTCTTCCTT	CAACTGCCTCTTGTCCTTGA
TM15523	TCATGTTTTCGCAAACTGCTA	CCTGACTTGCTTGTCTTTTCG
TM15531	AACCTGTTTGGTTGGTGGAA	GCCACCAAATAAAATCCCTAGA
TM15535	GGGATTTGACTTTATTCACTTGG	GTGGGGAAGAAAGAGGCATT
TM15555	GCCCAGTCTGCTCTGATACC	GGTCCCTAAGGCAATTTGCTA
TM15556	GGAAAGTGTGATTTGCTACCG	CGCATTTTTGTTTGTGACGA
TM15606	AATGGTTGAGGAACCCTCACT	ATCAGTTTCTGAGGGCCATT
TM15619	CACCCTATCGACCTTCTGGA	GCGCTGCTAAACTGTCACAC
TM15629	TCGCAGCCAATTTTTATTGA	CGTCTAACTTTTTGGGGTGAA
TM15631	CCAATTGGAGTATGTGCGAAA	CTTGAGATACCGGCGACAAT
TM15642	CTGACGGAATCAAGGGAAAA	CGAGTTTGGCTTCCGTTTAG
TM15646	AAAAATACGGCCCACATTGA	ATTCCACAACCTCCACGAAC
TM15652	ATTACTGGCTGTCGCGTGAT	AAGTTTGATCCCGAGCCTTT
TM15689	GTATGACAATCCCCGAAGGA	TCTCCATAGAGGTAAAAATGCTTG
TM15702	AGCTTCCCTCGATACCATCA	CAAACTCTGAGGCCAGGAAA
TM15703	CCTCACCCCCAATAAAATGA	GGCTTCCATGATTCAAAAGC
TM15705	GGCTTTAAGGCAGGCAGATA	AGACCCCGATGTATCAACCA
TM15733	GGCAAACAAGGGCTTTAAAAT	CCCCCAATTTCTTCTTTCAA
TM15780	GTAGCCCGTCAAAGATGCTC	TCGGGTTTAGGCCTTTACAA
TM15850	TCGAAGAACAATTAAGGCAGGT	GGCCTATGATCCATGATGCT
TM15862	GGAGAGTACCATGCGTGAGG	GAGTCGCCCAAGTTTGTGTT
TM16193	TGGAACTCCCTCTCCTACGAT	TGCAAATTGGCCTTAACAAA
TM16370	TAGCTAAAAGCCATGCGACA	GATTGGTCTTCAATGGTGGAA
TM16398	TGTCACAAAGAGGTGGCTGT	ATGTGACCTTTTTGGGTGGA
TM16438	GGGCGTAAGACCCATGATTT	CCAAAATTTATGGCTTGCTACT
TM16474	GCAAGCAAAGGAGGATTTTG	CCTTCCTCTGAAGCAGATCG
TM16513	GCATACAAGTCCGGGGATAA	GACGCATCTACCTGTGTTCG
TM16514	AGCCGGTAGAGGGAATCAAT	AGGTTGTTGGATGAGGACGA
TM16531	CACCGTGTCCAGTCAAATGT	TCTCCAAGGCACATCTTTCA
TM16572	GCTTTGGGCATTGCTATTGT	GGTACCGAGTGTCCATCCAC
TM16919	GAGGGGAATTTTTGGGAAAG	TTCATCCACCGTCATCTACCT
TM16923	AAGTGGCGAAGATTTTACCAAA	CATGATTGTTAGTGGCGGAAG
TM17538	TGCATGCAAGATCTGAGAGAA	TCTTCACCCCTTCTTGTTGG
TM17575	CGCCTGATTTACCCTGAATG	CCGGCATATGTTCAAAGTTGT
TM17742	AGATTTAAACCTCCCCCTCA	GCCCATTTACCAATTTGACC
TM17782	GAGGGACAGAGATCGAGACG	CCCCTAAAACCTGACCCACT
TM17965	CAATAACGCAAGCTCTCAGC	TCGTACACCTTGGCATGATT
TM17969	TCATTGAGTAGCCGAATGCT	ACCACGCACGCAATTTAATA
TM18162	CGAGAAGCACGAAGAACCTT	GCGACAAATTCTCTTGTTTTCC
TM18248	TGAAAGGCTCTCATCCCATT	GTTCCAACCAAACCCATTCA
TM18275	AACCCACAACCATCCATAACA	GTTGCGGAAAGGGTCATAGA
TM18508	GGCATGGCTAACCATCATAAA	CTTTAGATGGAGGGGGAAGG
TM18656	CATTCCGTATCTCGCCAAGT	GCCGTGAATGCTTCTTCTTC
TM18659	GAAGATTTTTGGGTGTGACCA	TTCGAGACTTTGTTTCCCCTA
TM18847	GTACCCAGCCTAACCTCGAA	TAGGTGCTGGCCAGAGATTT
TM18888	GGTGAGGTGTATTTGTGGAGGT	CCCCAAATAAATTCTCGTAGTTG
TM18997	GGGATGATTGAAGGGGAAAG	GGGGGAGTGGCTCTTATGAT
TM19047	AGATGGGGAAAAATGGGACT	CCCCTCTTACCCCAAACTCT
TM19273	TCCATTCATCCCAAGTTATGTG	TGTCAGCAGTGGCTCTCCTA
TM19416	CCCTTTTGCCATTTTTCACT	GGCAAATTAAAGCCGAAACA
TM19848	ATGATGCACTTCGCCCTAAC	TAGTCCGGGAGCTTGTTGAC
TM20059	TATTGGGCTACTTGCCTCCA	CAATTTCGACGCCAAGTTTT
TM20061	AGAAGTCTTCCTTCGCGTTT	TTCTCACACCACAACCTTGC
TM20062	GCCCTTCAGTACATCCCATT	AACCCTAAAACGCGGAAGAT
TM20068	TCCTTTTTCATCCGATTTGG	CACCCCCTACCTTAGGCATT
TM20074	TCCTCAACCCTCTCTCTCTCTC	GGTATGGTTCAACGGTGGTC
TM20085	CAAAATCAGAGACAGGCGATT	TTGCCTTTGAATGGTAAAACG
TM20132	AAGGCATGGTCCTTTCTTGA	TCATGCACAATGGAAGATCG
TM20229	CCCCTAACCCTTCCCTAAGA	GCGCAAAAATTTACTGCGTAT
TM20230	CATGCAAACACAAGTCATGC	CCCCAACAAATAAGGGCTTT
TM20237	GCTCCGTTTGCTTTACCAAG	GCTGACGCATGTTCAAAGTC
TM20241	GCCGCTTTCTAGAGATCCAA	CAACTTTGTACGCCGAGGTT
TM20243	CAATCGTTTTAACATCGACAAC	CTTGGGTCCAAGAAAGCAAA
TM20261	CACACAAATCATCCCCTTCC	GGGAAAAGGGATAAAATCCAA
TM20271	TTGCCCCTTTCGAATAGTTCT	AACGACCCCTAACAGTGCAT
TM20276	GAATCCGGCACAGATGAAGT	GAAACTTTTGGCGAAACTATGA
TM20282	CTCCCACCCCGTTATTACCT	AGTGCCAACCTCGAAATCTG
TM20364	AGGCATTTTGTGACAACTACCC	CTTGTGGTGGATTCCTGGAG
TM20406	TCGTAAACTGCGGTCGGTAT	CGGAGCGTTACAGTGTGTGT
TM20427	ATGCACAAATTCCATCGACA	AAAGCTCAATTGGCCTGAAA
TM20429	TGTGGAGTAGTCGCGTTCAC	CGAAGGCCAAATCTTCTCAA
TM20473	AATATCCAATGCAACGCACA	TTGCCTCCGCTTGATTCTAT
TM20477	CGCGCTATTATTAACGTGCAA	CAGCTCGGGACTATCACTGG
TM20483	TTTGAGTTGTTGCGGTTTCA	TGCACAACCGGTCTCACATA
TM20493	GGCTATGTACCATTTTTCTCTTTCA	GACAAGTCAGGTCGTTACGC
TM20498	AAGCAGAGGCATACCCAAAA	TGGGCAGTCAGACATCAAGA
TM20708	AATAGCCGCCCACCTAAACT	TGTTGAAGAATTTGAACGCTCT
TM20849	TGCCACCTTTAAGACCTTCC	TGCAGGCTCTGACTTAGGAAA
TM20913	TTCCCCTCTTCATCAACACC	GCTTTGGCGGGAAATTTAGT
TM20945	AGGAATCTTTAGCCGTATTAGAGA	GAAAATGATCCCTTGCCTGA
TM20965	TGGTCAATGGTGTTGGGTTA	TCAGAGATGACCACGCAACT
TM20991	GGAGGCTGATGAAGATGTTG	CGTTGATGGCCCTTACAAAT
TM20997	CGAATGTTGAGGTCCAGAGC	TTCACCAGCGAGTGCTACTT
TM21013	TTGGGCTCAAACAAATTATGC	ACTTGCACCCATTCACCTTC
TM21076	CATCCCTTCCATCCTCCATA	TTCCAAAAGAGATGGTTGTCG
TM21082	AAAGTCCGGGTCGTGATAGA	GCCCAAGAACACCAAACATT
TM21226	TGCTTGTTTGGCTAGTATTCAAC	CATTCCCTTCATAATCGCAAA
TM21365	TTTTTACCCCCGTCACATAAA	TGGCTTGACAACTCTTTGTAGG
TM21655	TCCCGCAACTTGACAATGTA	ATCCAAATGAAACCCTTTCG
TM22070	TTTCACGAAAGCCAGCAAAT	AAGGCAAATGGGACTATGGA
TM22076	CGCAGACATAGCAACCAAGA	AAGGCGATGATGGTCACTAGA
TM22083	AAGAAGTAGCACGGGAAAAGAA	GGAGGAAGGGTGCTAACTGA
TM22093	GGGGGTTTTGGACAGAAAAT	CGAACGCATACCCAAACTTC
TM22097	TACCGCCGATGACTCTTCTC	CCCCAAATCCTACAACACCA
TM22128	TGATTGTCTCGGTGTTTGGA	AGGCCCCCTCAGTTCGTA
TM22138	TTCTCCAGAAAGCAAAAACCA	TTTCCCCTTATGATCGAGTGA
TM22144	CACTCATCTCCCCCACTCTC	TCCGTCTTTGTGTGTGTGTG
TM22145	TCCCCCACTCTCTTAGGTCA	AGCAAAAGGTTTGAAAGGTCA
TM22149	CCAAAGCTAATAGGTGCCCTAGA	TGCATTTAGCAGCTTTCGTTT
TM22150	GGTGTTCCTTAACCAATAGCTTC	CATTTTGGGTCATTACAACTCC
TM22156	AAATGATAGCCGCTCTCGAA	TTTGCAGAAAGTAAGGGCAAA
TM22157	TGAGGATCCTTGGCTAAACG	GCTCCCAAAGTTCCAACAAA
TM22165	ATCCCTTCTACCCCGTTCTT	TGTAAAGGATTACCATCAGAGGA
TM22166	GGCTAAGCCAAAACATCTGC	TCCTTGCTCTCCTTGTTTCAA
TM22171	TGCTCTCTCTCCACAAAATGG	CCAAAAGCATGAATTCGGTTA
TM22173	TGGCTTGATCACAACACTGC	GAGTTTGCATGCACCAAAAG
TM22174	CGTACCCCCACAAACAACTT	GAGAAAGGTGGGGAAGAGAGA
TM22177	GTGATTTTCTCGCACACCTG	CCTAAAGAATGCTTTGGATCAGA
TM22180	GCACGCATTCTCTCTCATCA	CTGCCATGCATAAGAGTCCA
TM22183	TTTGTTAGAAGGAAAAGGATGG	GGGCAAATATCACTTTTAGCAA
TM22242	ACTACCATTAAGGCGCGAAA	GCCATGGCCAAATCTATTCA
TM22268	CAAAAGACGGTGGGAATGAT	TTTCTTTCCAACGAAACAGC
TM22284	TAATCGCCATTGTTGACAGC	TGTAGATCAACGGCCCAAAT
TM22313	CTTCAACACCCTCTCCCAAA	TTGCTCCCAAAAATAATAGTCG
TM22334	ACGTCTTTGGCTGCTGTCTT	TCGTAAATGACCGTGAGGGTA
TM22392	TCGTCGATCAGTTTTGTGGA	AGGCGATTTTCAGGTTGAGA
TM22393	AGCAGTGGAGGGAAATTCTG	TGGATTAGGTCTCTGGGAATG
TM22396	GAGGTCCGTTCGTTACTTCTTT	AACATAGGCTCAAAACCACACTT
TM22419	AGCTGGCCTATCAGCTTCAA	AAGCGCATTATACGTTCCTG
TM22438	AACATGTATTGCGGTGTCAA	TCGGCTTTAGGAGAAAGGAA
TM22469	TGATTCCATCCTTTCTTGTGTG	CAACGGTGAGGCATTCATAA
TM22471	ATCGATTGATTTTCGGACCA	TGTGTGCATGTCCAACACAT
TM22472	TGCCAATATTCTCGAGTCACA	GCAATATGGTGCCGTCTTTT
TM22492	CCAAGACCCTGATCAAATGG	GAAACCAAGCAAGTGAAGAGAGA
TM22563	GGTGGCGTAGATTGTTTTATACG	AGATAGAGGCGGGGAGAGAG
TM22568	AGCTTTTCCCCCTCTCTTCA	CTGCAGCCAAATGATAAAATGA
TM22579	AAATGCGGGCATCAGAGTAG	CCAGATTCGACAACTGTGAAAG
TM22635	AAGCTAAAAGGGCAAATTCC	ACTTCCCCCGGAAAATCAC
TM22637	CAACACGCTCACTGCTCATT	GCTCAAGGGGCAATCAAGTA
TM22642	CCGATAGTTTCTCCGTTTCAG	CCTTCCTTCCGTATGATTCTG
TM22644	GGCCATTCAAATGTGACATAA	AAAGGTATGGACCATGTACCG
TM22647	TTTTGTGGAGGTCGAAAACC	TGGCTAAGGGGAGGAGAAAT
TM22649	TGACACAACTGGGAAAAGCA	TCGAAACTAGTTCGTGCAAAA
TM22651	TGTGCGTGAATCGGTAAAAA	TGGATTGGGAATGAACCCTA
TM22654	GCGTAGAAAAGGTCGGTTGA	TTCGATCTGACGAAACGAGA
TM22655	CGCATGGTGTCAAACACTTT	TCATCCAGTTTACCCTGCAA
TM22656	TTCAACATTTCATGGCCAAC	CGGTTCGGTAGGTTCAACTG
TM22660	CCCACTAAGTTCTCAACCTTCC	CTCTGAACCAGTTGCCGAAC
TM22670	TTAGCGGCAAAAGATGATCC	GCACACACAGCCACACCTAC
TM22676	TGGTGTATCGGACTCTTACTGG	CTGTATTATATGTATGCATGTCCTGCT
TM22688	GTGAGGCGACATGCACACTA	GTGCATATATGTAAATGGTGTTCG
TM22690	AACTCCTCAACCGGAGTGTG	GGTCTGTTCGCCTTGAAAAT
TM22697	GAGGAGCGCAACACAATACC	CCCTTCTTCATGGATCTCATTT
TM22700	TTGCATTGACTGGACAAGTTT	AGCGCTTAAAATGCAATTCG
TM22762	CACAACCACTGCTTTGCCTA	TTTTGTGGCTGCTGATTCTG
TM22768	GAGGCTTGTCTCTTTGTGTAGTCA	GCGCATCGTAAAACCAAAAT
TM22798	CTTTTCCAAAGCAATGCTCA	GCCTTCAACTTCGAAGCAAC
TM22811	GAACAGCTCCGGAGATCCTAT	TCCTGGTACGATATGCCAAA
TM22829	ACAAGGCTGCTTTGGTGTTT	CTGGAATTCACCAACCCACT
TM22830	TGAAAGTGAAGGGGAGAGGA	TTCTAGCACTCGAGCCAGGT
TM22844	ACTCCGGTGACACCACTCTC	GACCATTTTTCCAAGCCTGA
TM22851	TGGAGGAACAGGTCAGAAATG	TCACTCCAACTCCCATCTCC
TM22865	TGGCTGTCTTTTGTTCTTCTGA	ACGTGCTTACCCCACTCATC
TM22929	CTGCAAAAGGAAAGGGACAG	TGGCATCCTTTACTTGGACA
TM22931	CACCGAAGCCCCAACTTAT	GGTTGTGTGATTGGGAAGAAA
TM22961	GTGCAAAATTGGCCAGAACT	GGAGCTTCTTTCTCCCTTGC
TM22963	ATTGCCGACAAAAACAAACC	CCACAAGAATTCACCAAAAAGC
TM22977	GATGGACATCCGTCCTGTTC	TGCAAGCACATTATGAAATGG
TM23047	GTCCAGGCATTTGTCCAGTT	GGGCAAAACCCTAACACTTTT
TM23048	CCCGAGACCTCACTTGTGTT	ATAAGGCGCATGGAGGAGAT
TM23076	TGCTTGCCAGTCAGAATCAA	AAGGCGAAAAGGCAGAAAAG
TM23077	GGTTGGCCTAGGTCTGACAA	AATGAAGCAAAAGGACCAACA
TM23081	CGGAGGGAGCACAATTCATA	GCTGCTAATGGGTTTTCCAC
TM23157	TGAATTGATTAGGGGTGTTGG	CTTCCGCCTGACAAAACAAT
TM23225	CCCCAGTAGATTGGGATTGA	TGCAACTTTGAGTTGTCGTTG
TM23227	GGACACCCCACAAGAGAAAA	GGCCAACAACAAGAACAGAAG
TM23265	GACCAAACTAAAAAGTTCAAGAGTG	GCAACATCGTTCATCCAACA
TM23269	TTGATCAAGATGGGATGCAC	CACGGAGGAGGACATACACA
TM23327	GAACACGCCGATGATGTTTA	TGGTCTGGTCTTTCACACGA
TM23342	TTCAAAGATTCCCGGAGATG	AAGTCGTTTGGTTGAAGAAAGA
TM23349	AGAGCCAAGCTCGTCAAAAA	ATCAAGAGCCCGGTTAGGAT
TM23380	TAGTGTGGGTTTTCGCAACA	CGCTGAAACACGTTCCACTA
TM23404	GAAGCCCATCGCTATTTTCA	GGAAGAAAGAAGAACAGAAAGGTG
TM23413	GCCGTGCAGAAACTGGATAC	GGCGAGGTTGGTCATACATT
TM23430	AGCATGCACAGAAAGCACAC	CAAATTTGGATCCGCCTCT
TM23433	CTCTGGCACCAACACCTTTT	TGCAGGTTCCTTAGGCAAAT
TM23446	GAGACCATGGCTCACTGTCA	CGTAGAGCCGCTACACATCA
TM23493	CTCAATCCCCATCATTTTGC	CGCTTCAATCCCAAACAACT
TM23595	TGTTTTCCGGAGAGAGGAAG	AGCTTGCAAAGATTTCGTCA
TM23680	CCCCTGAAACCAAATGAGAA	CGGTGAAAGTACATGTTTTGTTG
TM23748	AGCTCCAAAATCGTGGCTTA	GCTTTTGCTTTACACCGACCT
TM23760	TCATCCCGAGAACGTCTCTTA	TTTTGTGCTATTACGACTTTACCG
TM23950	GTCATTTCGGGTGCCATAGT	CGGTACGATACAGTCAAACCAA
TM23958	GGGCTTCGGAAGGATAAAAA	TGAAGTTTACGAGCTACCCACA
TM23983	GGAAACATGGTTGCTGGAGT	TTAAATCTGTTGCGGCAATG
TM24077	GGAGGGGGTTTTGGTAGTGT	TGGAGTTCGCTTCACAAGG
TM24091	CTGGCCGAAGTCGTCTCTAC	CCCTCTCTTCTCTCCCCTTC
TM24197	TGTTGGCTTGTTGCATCATT	GAGCTCGAAATTCAGCCAAA
TM24327	TTTGAATCATGGTGTATCACTCG	TCAAACAGGGGAAGATCAGC
TM24331	GAGTCCTGTCATCCCCAAAA	GACCGGATCAAAGAATGGAC
TM24365	GAGCCCGAAATTGGTCAGTA	CTTCGTTGAAATGGCAGGAT
TM24369	CCAAGACCGGACTCATAAGG	GCTATTCAAATTTCGCCAATG
TM24406	GCATGCCAATGCAGTACAAT	TTGTCCGTGCCAGATATTGA
TM24520	CCCCTTTTAGAAGAAGCCGTA	CATACTCCCTCAACCCCTTC
TM24525	TTTGCCGGTGGAGAGATTAC	TGTGAAGGTCGTTGACGAAG
TM24529	AACGGTATAGTAACGTCACATGAA	AACGCTCTTTCGTCTGAAAA
TM24531	ATTTGAGGGCGGATATAGCA	ACCCGGGATATTTGGTAAGC
TM24590	GTCCCTCAAGCCCAAACATA	TCTTGTGCAACATGAAAGGAA
TM24593	CGCACTTTGATTGAACACGA	CATTTTGACACTCGCACACC
TM24604	ACATCCTTTTCCGGTGAACT	GCCCACCCTGTCACTTAAAC
TM24605	TGCCTCGGTGTTTCTGTAAA	TCCTCCTCCGGAGTACACAC
TM24619	TTGGGTCATGGTCGAATTTT	AATCGACCTGTTTCCCCATT
TM24626	GCAATTGAATAGGCATAACTCCA	GGACCCAAATATTCCGGTAAG
TM24649	GCGAACCGACTCTAAGCATC	ACCATCATGCAATGTGGTTG
TM24652	GCATACCAGCCTAAAACCACA	TCCTTTTACCGAGGAACTGC
TM24663	ACCGAGTGAATATCGGTTGG	AAGGCATGGGAAGCAATATG
TM24698	TGAACCTCTCCGGAAAATCA	GTGTGGGTGTGTGCTACGAC
TM24721	CCGATGAAGCAAACCATCTT	ATTTGGCCCTCTGGCTTATT
TM24722	GGGTATGGAGGTGGAAAAGG	TATCGTCCCAAAACTCTTGC
TM24746	TTTGCGCACAATAGAGAGAA	AATGGCGGCATAGGTAAATG
TM24753	GACCAAAACGGTCGAAAATG	GCTAGACGGAGGGAGGAGAG
TM24769	TGCAAACCTTCTTGGGATTT	AGGGAAGAGATGGGATTGCT
TM24774	GCGTTTGTGTCAATTTGGAA	TCGTTTTTCACTTTGCTTCG
TM24805	GATGTGCTCACCAGGCAATA	CAATAAGGCAATCAAGGGTCA
TM24814	GCCCTCAAATTCCATAGCAA	TGTGCACTGATGGGATTACC
TM24833	CGTTTGGTCAAGTTTTGATTTG	GAGCTCCAAAAGGAATACCG
TM24852	GACGTCAACGCGAATAAGGT	CATGGCTGGGTACGATTCTT
TM24916	GCGGTTTCATCTCCTTTTCA	GGTGGTCATCAAATGAGTTTACA
TM24923	TCCAGGGCCAGGACATAATA	CGAAAACTCTGCCTTTGCAT
TM24928	TCCTTTGAAACCCCAGAAAA	AAGGGACCTCACATTCACTCA
TM24987	TTGATGTTAATGGCCATCTCTT	ACCCCTTGCTCAGGAATGTA
TM25032	AATTCGCCAAGTCCAAAATG	GGCAGGATGATTATGCAGTG
TM25035	ACTAGTGGGGAAGGTTCGTG	TCAAATCTGTCTTCACAAAAGG
TM25039	GGGAGAAGTTTGTCCCACAG	GCCTCTCAACCCAAACTGAA
TM25041	GCAAGGCAATTTTGAGGAGA	CGATCAAGATTCGAGTCCAAG
TM25043	TACCCCAAGGATGAGGATGA	AAAATGCCGAAGGGAAAAAG
TM25051	CATGTCACAGGCATGCTTAAT	TTGTAGCAGATTGTTTGGGTTT
TM25052	GAAGCAAGTTGGGGTCAAAA	GCCCTATGCTCTTCATCTCG
TM25054	TCCGGATAATCTTGAGCAGAA	TCGGGAATGGTTTCCTTAAA
TM25181	CGCATGTCCCATCAAAGTTA	CTAAGCACCGTTGTGACCAA
TM25187	GGGGCAAATTTAACGGACTT	TAATCCGAATTTGCGTTGGA
TM25215	GGTTGTACGCCTCGTCACTT	CGTAAACGGAGCACACACAC
TM25341	TTTGGTGGGTGCAGTTTGTA	CCCCTATGACGACAACAACA
TM25414	TAAAAGGGGCTCCGAGTTCT	CCTTGGTTAGAGGCAGTTCG
TM25427	TGCATTCAAAGAAACCGTAGC	ATCGCATCTTCCGTCATTTT
TM25430	ATCGAACTAAGCGGGTTTGA	GGCCTCCCATTTCGTATTTT
TM25440	TCGAGTCAGGCTAAATGGAGA	TCTGCATATCCAGGGTAGGG
TM25480	CATTGGAACAGTCCTTGTTGAA	GAAGCCTGATATGTCGCTCA
TM25609	ATACGGTGGGGAATGTTGAA	GAAACGGAAGAATTATGTTACGG
TM26594	CCACGTCCACATTCACAAAA	CGTGGATTTACCTTTGCTCA
TM26595	CTGGCCATGGAAGGATTG	GAAAGAAGGAAGAAGCTTGCTAA
TM26653	TGCATCTTATTTCAACAGGATAGG	AAAAAGAGGAGAGCCTCACAAA
TM26688	AATCCACATTCCACGGTCAC	CCAAAGTCAAGGGTTCGATT
TM26896	GGGGTACTCGCCGTTTAGTT	CCTAACCGACCTTCTGCCTA
TM26905	TGCAGGGAGTTAGCAAGTCA	TTCGGAGAAAAGGCTTATCAA
TM26908	TGTCAGGAAGTCTAAGGAGGTTG	AATGAAGAAGAGCCCGTGAA
TM26932	GACAATTGCGGCATGTTAAA	GGTTTTGTGTATGCGTGTGC
TM26969	AGCCAAAGGCAAACTCAAGA	ATGTGCAGAAAAGCCAAACC
TM27036	ACGCGCTAGATAACGAGACA	CGACCGATCATAGCTCAGTG
TM27039	CACCACAATCAGTACCCGTAA	TGATGGTTTGTCAGAAATGGA
TM27067	CAAGAGCGGTCGGAAATTAG	CCCAGGATTTGAAATTGGAG
TM27070	CCGCGGCAGAACTATTTACA	CACACTACCGTCTCCAAACCT
TM27076	GCACACATGCACTTTCCTATTT	CTCCGGCTTAGAAAAGTTGG
TM27079	AAGGAATCTCAAGGCGAGGT	TGCTCCCGAACAACAACATA
TM27080	TGAGGCCAGGTATGAACTGA	CGGAGGCGTACACTGCTATAA
TM27082	AACCCCTGAAGTGCCACTAA	GGAAGGGCAGTGACTTTTGA
TM27128	CATCAAGCCTCTCATTGCAT	AGGGGGTCCCTATGTTCTTG
TM27133	GGGATGCAAAGCCTAAATGT	TGGGACCCATTTTACTGTGTA
TM27136	TCATGACACTTTTCTTCTGTGTTC	CGAAGGAAGCAAAATTGGAG
TM27141	CCGGAGATATTTTTCAATTACCG	GGATTCAACTGAACCCAGAGA
TM27142	TCAGGTGGAGGTAGTGCGTA	CCTGTGTTCCTGATTCCCATA
TM27146	CCAACAGCCATGAATAACCA	ATTCGAAGCCATGCTCACTT
TM27210	CCTGGCACGTAAACTGATGA	TTCCAACATTCGAGGAAGAA
TM27214	TGAAGCAGAAAATGATGCAGA	TTGCTATTTCCGGTGGATTC
TM27245	TGACTATAGCGCGGCTGGTA	CGTGCAAGCTCTTCATTCAA
TM27246	GACATGAAGCGTCCACAAAA	GGTCGGGTACGTTCTTATCG
TM27248	GGGTGCACTTGCATTGTATG	GCGCAAATATTTCTATTCCAAC
TM27249	ATACGTTGTGAAGCGGGTCT	TGCAAGTGCACGTCATCTTTA
TM27254	TGCATGCCAGCTATGGATTA	CGGCCTAAAGGGGTTATTTT
TM27256	GGGCTAGCAAGACCGTCATA	GGGGACGCTACACTTCAGAT
TM27270	AACGCCTAAACGGGAGCTAT	TCCTCTTCCTCAGCATTTTCA
TM27282	GTTCGGCAAAACTGCAAAAT	AGAACATTTCTCCTTGGATGTC
TM27284	TGAAGAGCCCGGAAATAAGA	TGTTGGGCCAGACTATTATGC
TM27318	GTATGCCGCAACGGTATTTT	GCAACACCCAGAGAGATAACG
TM27355	GGTTCTACACGATGGCGAAT	TTGAGGTGTTGGAACTCGAT
TM27411	TCGTTCCTGGGTTCGAGTAT	CGCGACTAAATTCTCCATTTG
TM27415	GGATGTGACAATCCATGCAA	CGCCGTAGGTTTAACGTTGT
TM27442	CAAGGTGATGCATATAAACCGTTA	GGTGAAGACAAATGAGGAAACA
TM27459	GTAAGGCAACCCCAGCAAT	CAAAACGTACTCTTATCCGATGG
TM27489	TGTCACAATTTTATCCGCACA	CACACAAATGGGCTAATTCTCA
TM27501	TTGAGAGCCTTTAAGGTGGAA	TGCACCATGAGAACCAAAAA
TM27509	ATGCATTGTGGACTGAGCTG	CAGACACACCCTTTGAATCAC
TM27526	TTTTGGATTTCTCCCCCTCT	CCAATTAAATCCCTTCATCCA
TM27528	TTCCATTCTTGGACTGTTTCG	TGAGGTGTTGTAGGGTGCAG
TM27537	GAAGTGGCGAGCTAAACGAG	CGAATCTTTGAGTTCGACAGAA
TM27560	GGGCAGATTCGTTGTTTACTTT	ACCAACCGACGAACACTCTT
TM27619	TGGTACGACCACACATCCAT	AACCAAGACATTTCCATCACG
TM27735	GGAAGCCGAGGGTATATTGG	CTCCTTCCCACCAACAACAT
TM27773	CTCGGGCTCTGGTTTTGTTA	TCCGAAATAGGGCAAAGAGA
TM27778	TCTGGTGCCCCAAAGTCTTA	CCCCGGTAAGGAAAAACAAT
TM27811	TGAGATTGAAACTCGACGAAGA	TCCACTCTGAAATTCCAATCAA
TM27822	CACTTGGAGCAGAACCCTTC	GAGCCAGACATTGTGGTCCT
TM27852	GATCCTGCGCAAGCTCTAAT	CGAGCCTTAGAGCCGTATTG
TM27859	CGGCCAAGGAGAAAAAGAG	TCCGGAAGGCTTTTGTACTG
TM27875	GCATCAATGGCCCTGTTTAT	TGGAGCAATATGGGGAGTTC
TM27892	CGAGGCGATGGATATTTGTT	GCTCAAGCTGAGTTGGAGGA
TM27900	CAAATCACCTCAAACTTCACCA	GAAGAAGATGAATGTTGGGCTA
TM27903	GCACCTCAAGTGCCAAAAAT	ATCCCGTTCTTCCGTTTCTT
TM27905	CTCGAGAACCTCCTTGATCG	CAGAGGCTGAAGGGAGAGAA
TM27914	CGCTCCCAGCATTTTTATGT	AAGTTAGGGGTGGGATTTGC
TM27928	AGTGTTCCTGAATCCCAAGA	TTCAAGCTTCTCCTGCTTTTG
TM27937	AGACACTCGTCGAGGACCTAA	CAAGAAGGTGTGCTGACTGC
TM28041	AACATACGCCCTTGGTTAGG	TGCAAAGGATAAGATGCGAAA
TM28092	CGACAACATGAGCCTTCACT	CTTATTTGCAGCCACCCCTA
TM28441	TCGCATTCAATTTTTCCTCA	GATCCCTTGGTGTGATCTCC
TM28920	TTTGCTCGCCCTCTCTTAAC	GCGTCATAATAGCTCGACATTG
TM29005	TTGGAAAGGTTGTCCACTCA	GATCAAGATTGCCCTATTTCC
TM29091	TCCATTGTGGTGCAATTTCT	TGCTCATCAGATCCACCAAA
TM29093	CAGCCCACGAATTTTCTTTT	GACGACCTGGACACACACAC
TM29115	CTTCACGAGGTAGGGATGGA	CGCGGCCATATTCACATTTA
TM29127	TGTGCCTATGAAATGTTTGGA	ACCAACGAAAGATGGCTACC
TM29132	CCAATTATGCAACATGAGAGGA	CACAGGCATACACAATTTACCAA
TM29134	CAGGGAGGTGTCCTGTGTCT	ACGCCTATGTCCTCCTCCAT
TM29137	ATTCGCACAAGCGGAATAAC	TTGATTTACTGGGCGTTCAA
TM29138	ACTTACCCCACCCCTGATTC	TGCATCGGATTGCTGTACTT
TM29250	GAACCGATGCACAAACAAAA	ATGGAGCCTTCGACAATGAG
TM29286	TTCTTACGAAGGGTGGGTGT	CCCCCATCTCATTAAAGCAA
TM29291	ACCGTAAGGAGGTGAGCAAA	AAGAAGCCGGGGTATCTGTT
TM29305	CCCCGTTGCTATTGCTATTT	AATTTCGCCATGATGCTGTA
TM29306	CCAGGATAAATGTCTGCACGTA	CGGACTCTCAAGGAGCTGAG
TM29318	CCCCTCTGTCACCATACCTG	ACCGCAAGTCCAAGCTCTAA
TM29338	GATTTCGGCCAATGGTACAG	GCAGGGATATAAGGAAGGGAAT
TM29354	CAGTTGAGGATTGGCGAAAT	AATTCGAGCTCCTGCACGTA
TM29359	GGCGTAGTTGTTGGGTTGTT	GCACTCACCAGTCCAGCTTT
TM29376	ATGTTTTGGGAGCTGAATGC	TGGGGAATCATTTCAATAGGA
TM29377	CGTGCACACACAGACACTCA	TCTCGGACTAAGTTTGCTGGA
TM29380	ACGCTCTATGTGCCTGACAA	GGAGGGCTTGACTATGACCA
TM29391	GGTCGGTCGGCATAAACTAA	CGGCTGTGAGCCAAAAATAA
TM29393	TGATTGGGATGGCGTATGTA	AATGTTGCCGAAGGAATCAC
TM29451	CGATGGAGGTACATCGTGTG	AGAGCCATCTCGCTCAAAAA
TM29470	ATCCGTACCCGGTCGACTAT	CGTTCCTTACCAGTGGAATTTT
TM29494	GGGAATGGGAAAAAGGAGAT	CAACAAAATACTATACGCCGTCTC
TM29502	GCGCCTCACGTGTATCTTCT	CTCTGCATCCTGCATCTCCT
TM29550	CAAAAAGGAACCCACACAACT	CGGGTCTTAGAATCCACAGG
TM29555	TTCCCCAAGAGCAGTGGTAG	AGGCTTTAATCCCCCAAGAT
TM29559	GGGTTTTGTGACTTCTTCACAC	TTCCGTATGATCCACCGTCT
TM29560	GGGTTGCATGAGGGTTCTCT	ATCCACCGTCTTCCTTTTCC
TM29617	TGAGGTGATCGAGAATAAAACA	CATCACGACGGGGTAGATTT
TM29671	TCCTTCCTTTAGAAAGGGGATT	GACAGAGAGTGACGGAGAGACA
TM29731	GACGAGATAGTGGCGAGAGTG	TTGCAGATTTGGTGGATGAA
TM29827	AAACCACATCATTTGGGATGA	AGGCCGCCTAATTTTGAGAT
TM29896	AAATTCCATGGCCACTACCA	CTTTCGTCACCTGCATTTCA
TM29967	GCCGAATTTCCTCCATTTTT	ACAGCCCAACGGAAGTTAGA
TM29969	TGAAGTTGTCCTTCAATTCCAA	ACCATCACCGATACACACCA
TM29970	CGGTTCTTGCTTGAACGAG	TTTAGGGGCTTGGTGAGATG
TM30057	GGCGCGTTGAAATGAACTAT	CCGTCCAAACAAGTTGTAAGC
TM30073	ATACTTGCGTGTGCACTTGG	TCTTCTTCCTCCTCCTTCTGC
TM30076	GTTTGGTGGAATGGAGTTGC	AAAATGGCAGCTTACCGAAA
TM30090	CAGTTCGTTGAGGTAGTTAGCA	CAGCACTGCCTCAGGATTTA
TM30107	TTCTTCTTCTCCTCCTACTTCTCC	TCAAACCCGAAACATGTCAA
TM30108	GACCCGAAATTCAAGCAGAC	AGCGTCCCTGTTGTGTTTTT
TM30145	TGCCCTAGTTTCCATCTTGC	CAAATCAGGAATCCTAACCCAAT
TM30146	CGCGCGCTCTACCTTATTTA	TCAAATGGCACGGAAACATA
TM30231	TCTTCCTCAGCAGTCCAAGG	ACATGCATTTCATGCCCTTT
TM30484	TCATGGAGAGCTCGGTCATA	TGTTTCCAGATAGTGTCCCAAA
TM30686	GTCCCCCTCGATTCTATCCT	GCATATTTGTTTCCGATATGCT
TM31229	CGGTTTAGGCCCAAATCATA	CCTTTCCCTCCTATTCAAAACA
TM31258	ACTGGCTAATCCCACTCGAA	GCTAACAATTGGAGTATGGTTGAA
TM31646	TCGTCAGTTTCTCTTTTCAGCA	GCAACCCCAAAAATCTTGAA
TM32514	GGGTCGTGATGGTTGTTGAT	TGGATTGGCGACGGTATTAT
TM32589	AACGTGGTTCAAAGGAATGC	TTATTGGCCTCCCCTCTTTT
TM32709	AGCTCTCATTCCCCCAAAAT	AACTTGCAAGCACAACAACG
TM32741	TGCTGGAGAAAGTGTGAACCT	CGGATACCGGGTAGAAAACA
TM32760	CCAAGTTTTGGAAGTTTTGCTT	ACACCGTGTTTTTGTCACGA
TM32762	GGGTTGCACACAGTAGCAAA	CAGCACAAACAAATGCCAAA
TM32879	TTGAGAGCTCAAACACGAAATC	CCCAATATTTTCACCCACCTT
TM32904	TTGACTCGGCACGAATTAGA	AAACGATGGTTGTTAAGCCACT
TM32993	GATTTCGTATCCGCGATGTT	ACCAATGCTCCTAACAATTCA
TM32994	TGAGGAAGGTGTTGACGTGT	TGCAACTGGAGTAGGGGAAT
TM33060	ATCGTACCCACGAGGCATAA	ATCGGATTCCCCCTCTCTT
TM33105	CGGATCCGCTTACTCAAAAC	GCTGGTTTGCCCAAAATAAT
TM33127	GCTTGCAAATTGACCAGCTT	GATGAGCATCAGACCCATGT
TM33229	GGGCGTTTCGTATCATTCAT	GCAGAAACTGGTGGTCATTG
TM33241	TAAGGGTCCAAAAACGATGC	ACTCGGACAACCAAATCCAG
TM33242	AGAAGCTTGGCCAAAGAGAC	TTACCGAAAGCTGCCTAACG
TM33246	CCACAACATTGTGTTCCATCA	CGTAACATCGCTCCTACCAAA
TM33253	AGCAAGAAAACCAACGCAAC	TTGGGAGGAATGAAAACTGC
TM33274	GCTTGTTGAGCTTGATACGG	GTCACCCCAATCCACATGAT
TM33292	TGTTGCGCATGTTAATTTTG	CGATTTTGAAGCGAGTTTGG
TM33434	TCTTCCTTCCCTTCGAAACA	TACGGGATTCAATGGGTCAT
TM33480	AGCTCCAAAATCCAAAACACA	TGGACACTTTCAAAAGCAGGT
TM33489	TCTTTTTGGATTGGATGTTGC	TGCCATGTCTTTCTTCTTCTTC
TM33545	ACCATGTGGCAAGCTGTGTA	ACCATGCCAAAATAATGCAG
TM33661	GCAAACAAAGTAGGAGGCCTAT	GCACGAAGTGTGTTCCTGTG
TM33710	CCAAAACAGACGAACAAGCTC	CTCAATTTCGAGGGGTTTTG
TM33869	ATCAACGCGTTTTGCCTATT	TGAGCAGAGTTGAAGTGGAA
TM34400	TGCAACGCGTGTACCTTAAA	GCAATACCAATGGGCAAAAC
TM34422	CCATGCAAAAAGATGGGTTT	CCAAAATGCAAAAATGACCA
TM34425	TTGATGGATCAAAAGGCACA	ATTTACATTGGTGGCGCTTA
TM34653	TTGATTGCCTGCAATGAGAG	GCGTACAACATGAAAAGTTTCTACA
TM35013	CGAAATGATTCCTTTTTGGGTA	CCACCTCTCCTTTGAGATCCT
TM35375	GGATTGGTGCTGGTAGTTGG	TTGCAAATCCCAGTTAGACACT
TM35521	GGCTTAACAAAGCGATAAAGAA	TTTGTAAAATGAGCGCATAGG
TM36048	TGAATGAGGGCCCTAGAATG	ATATATGCGGATGGGGTTGA
TM36130	CTGCTGGAAAAGCCAGTTTC	AAACGAGACAAGGGGCACTA
TM36132	GCCGTTAACATGGTCGCTAT	GATTTGCAGTGATCGTTTGC
TM36133	CTCCTGCAAACATGCATAGC	ATTGATGGAGGCGGAGTTAG
TM36166	ATGTTAGCCACCATCAACCA	GAGATGTGCCAACTCATTTCC
TM36173	ACCAGCACTTCCCAACACAT	CCATCTGTCTGCTTCTTTGGA
TM36274	GAGGCGTAAACCCCATAGGT	TCATCCTTTTGGTTCTTCCA
TM36275	CCGGATTTTGCCAATACAAT	CTCTGGAGCAATGGACCCTA
TM36295	TGTGCTGAAAACATCAACCTG	CAATACTGCAGCAACCCTGA
TM36311	TCTTTCCAGTTCCCACCAAG	TTTCCCTTTCCCACTTTCCT
TM36331	ACGACGAAAAATGGCGTTTA	CCATTCTGCAAAAAGGATCA
TM36333	ACCTCCAATTGGCTTTCCTT	GGGCATAATTGACCTCAACC
TM36385	TCAGGTGCAACACCAAGAAA	TCTGTTCGTAGGAAAAAGTTGG
TM36676	TCACATTCACGTCACAAAAGC	TTCCGCCAGAAAGTAAGAACA
TM36768	AAGAGGGATTTGTCGGGAAG	GTGGCATCACTAGGGAATCG
TM36788	TGCAAAGGAAGAAGAAGAAACC	CGGAACACCTTATTTGATCACC
TM36816	CGTTTAGGACACAAAATCATCG	ACTCCAGCGACGACCACTAC
TM36817	CAAATCCTCCTCCTCCTTCTC	CACCCCATGGCTAGAACCTA
TM36990	GCTGCGCGTAAATTTTTAACT	ACCGTACCATACCGACCAAC
TM37167	TGGGAAAGAGAAAAGCAACA	TTTTGCCCCAGTTTCTATGC
TM37168	TGGCAAATGAAACAAATCCTC	GGTAAAAGATCCTTTCCTTCATCA
TM37169	GATGATATGATGAAGGAAAGGATCT	TTGTGGACGGAAGAAGATTTG
TM37182	TCCGGGGTAAGGGTAAAATC	CAACGACCTGGACCAAAAA
TM37494	TTTCTCTTGCCCCATTGATT	TCAAACAGCCCCATGAATTT
TM37506	TGAATCTCCATCCCTGCTCT	CGAAGGAAGAGAATTGGGAAA
TM37531	AGCCTCCGGTAGCACAACTA	AGACTGAGGCATGTTCAAGGA
TM37540	CCCTTGTCCCATGAGCAATA	GTTGGGCTGGAGAAGTTTTG
TM37542	CGGTAGCCCTTCATAAGAAAA	GCGGATTATATCTTAGGTGGTG
TM37553	CGTGCCCAAAACCTTAAAAA	GGGAGATGGGAAATGGAGAT
TM37555	GAAGGAAGCATAACCGAGGA	AGCCTCTAGGGCTCGAAAAA
TM37567	TTCTTGCCAAAATACCCGTAA	CCCTAAAACGACAAGAAAAGTCA
TM37569	TGAACTTAAGTCTTGTGCATTGG	TTGCTCCTTGATACATCATCCTT
TM37590	GAGCGTGTCTATAGGCGTGA	TGCATCTCATGGGGTTCTTT
TM37606	TTGCCTCTGGTTGAACAGTCT	CCTACGGGGCAAAATACAAA
TM37607	TGGTCGGGTAACAAACACAA	AGTTGGCATCGTCCAAAAAG
TM37608	CGAGCTTTGGGAGATTGAAA	GGGCCGTTTTATAGTGCTTC
TM37611	TTCGCGAGGTGTGTTTGATA	TGTGCACTAGTAGAGCCAGAGG
TM37665	TGTGGCAACATTGTGATTCC	GAGGTCAGCATGACCGTTCT
TM37666	TGGAGGAAAAGAACAAGATGG	TGTGATTTCCAAAACGGTGT
TM37675	GCCAAATAAACTCACCAAAAACC	TTTCATTTTGCTCCCTATTGC
TM37687	CCAAAGAATGCAAACAATGGA	CGGTTTGGTTGGAAACTTGA
TM37694	CACATGTCATCGCATGGTTA	TGCCACATGGCATAGTTTGT
TM37695	TGACTCGTCTTGTAGCTAGTTTGG	GCGATCAAAACTGGTGGAGT
TM37706	TCATGATCTCGTGGTTACGTG	CCTGTGTCGGTCGAAAATCT
TM37725	GGGGGCCAATTAACATTTTC	TGCCCATGCACTTCATTTTA
TM37754	TCAAGTTTCCAAAGGCGAAG	CAACGTAGCCAAGTCCACAA
TM37762	TCACGTAGTCTGTGGCGAAG	TCCCTCCCAACAGTAGGATG
TM37783	CCTAACACATCCCCAACTAGGA	ATAGGCGCAGATGCTTCAGT
TM37812	CAACACTTCCCAACAAGAACAA	GCATAGGCACCCCTGTTAAT
TM37816	CTTTTGAACTGACCCGTTGC	GGATGATTCTGGGTGAGACAA
TM37819	GCCATCCATCAATTGCTTAAC	ATAGCCGGCCCATAAAGTG
TM37838	TGCACGAATATTGACCTACCC	TGGCGAAAAGGTAGAGGTGA
TM37845	TGGATGGAAATCATGGAGAA	TAACACGACGAGGGGAAAAC
TM37854	GGAGAGTCTCGCATCTTTGG	CGCTATTTGAGTTTCGCTGTC
TM37882	AACCTGCCTTTGGAAATTGT	GCATCTCGCGACAAGTGAT
TM37888	TTTTCACTTGTTGCCCCTTT	TGGAATGCTGCTCTACCTCA
TM37897	TCACCACTTGAAGGTGAGCA	GCCGGTAGAAGTGACCGTTA
TM37931	GGGGGAAACGGACTACAATA	AGCTCATCGAGCTGACAACA
TM37936	CCCAAGAAAATGAGGTAGAGAAGA	AGTTAGTAGCGCTGCCGTTC
TM38039	CCGGTTCCAGTTGTTAAGGA	CCGATGGCAAACTCTCTCTC
TM38040	GCAAAGTTTCCAATCCTTCG	GTTGCGTATCGGGAAGTACG
TM38063	ATCCAGGCATTGAGGCATAC	CATCATTAACCGCAGGAAGC
TM38126	CGCGTTAGAGTTGTTCATGTT	CAATCCAAGCGTTATTCTTCG
TM38177	GTCATTCCTCACCCACCCTA	GCAAGCCCAGTTGTTCTTATG
TM38180	TTGCATGAACCAAACGAAGA	AGCGAGGTTGAAATTTGGTT
TM38237	TTGATAACATGGCGGCTTAG	TCCCATTGAAATTCCTTGTTC
TM38245	TCAAAGAACACAGGGAGCTG	GCAACTTTGCTCGATGTGAA
TM38246	TGCAAGATACACAACAGCACA	CTTAAGCGGAGGGTCTACCG
TM38254	TGAAGCTTTTCACAGCCAAA	CATCCCGATCTCACCATTTT
TM38283	GGAGATCGATCGGTTTTCTTT	CCTGCAGAAGATGGATTGGA
TM38349	GCCACATCCTGAAGATGACA	TCAACCATCCCCAGAATCAT
TM38350	ACATGTTGCCACATCCTGAA	GGTGGAAAAAGGGGTGAAAT
TM38485	CTGAAAGCTTTTGGCATGGT	AACAGGTAAAGGATTGGCACA
TM38488	CTCAATCGACTCACGCCATA	GGCAGGTAGACAGGCAACTC
TM38530	TGAAGCAGCTAGACACCCTTT	CACCTTTCCTTTGGGACCAT
TM38549	TGCCACTTGGCATCATAAAA	TCAAATTTGGGAGTAGTTCTTCCT
TM38575	ATCCATGTGTCACCGTCTCA	AAAACAAAATGGCGAAAAGG
TM38681	GCATGATGTACACACCGATACA	AGCCATTTTGGAAGAACGAG
TM38685	CCTTTCAAAGTGGCCAACAG	TCAATACAATGCAAGTGTATACGAG
TM38731	TTCAACCGTCCCATACCAAC	TATTTGGGGAAAAGGGGAAA
TM38741	TGTGCTTAGCATATCACATACAAAC	GCATCGAATCCCCTATTTTG
TM38778	GCGATAAAGGTGTGCAAATG	GTCGGGTTGGTCTAGTTTCG
TM39019	GCGGTAGGTTTCGTGGTTTA	AGGGCGTATCAAAAGCAGGT
TM39244	CCACCCCCGATTACCATATT	CGAGCTTCTTCGTTTTGGAC
TM39335	GTTTTGACCGGCTCAATCTC	TACCACATTTGAGCATTTCG
TM39343	CGGCCTGCACAAATCTTAAT	CCGGCAACATAATATCAAAAGG
TM39344	TACGTTGGTCCGTAGCACAA	ATGCCCCTCAAATTGGTTCT
TM39350	ATTGAAGACGGACGGACTGA	TCCCCGTCACCTTAACGTAT
TM39712	AGTGGCCATTACGACGTCTC	AGGGGAATTGCTTCTTCAGAC
TM39809	GGTGCCAATATCACCAACCT	CTCGGGATGCACGAATAAAG
TM39860	CCAATATGAAAACTTTGCGATG	TGATTCCAAAATGGCAGTGA
TM39871	GAACACCGAAGTATGCCACA	GCCTTGAGTTGAAGGTCGAT
TM39878	TCGCCGCATATTCATAATCA	TTGGCATATTGCATTTGAGA
TM39891	CGTACGTGGTTTTTCCTGTTT	ATGGCCATGAAGTGAAGTTT
TM40452	TGGGTTACAATACGCCCAAT	CCCTCTCCCTATGGGGTTT
TM40614	CATCCTCAAAAGTGGGTGGA	ACCAACAATGGCTTCACCTC
TM40646	TTTTCATTGACCTAATCCAGCA	CAACTATCCATGGCGTGTTTA
TM40647	CAAGGAAAATGGCGTAAAGC	TGCTATGACATGGACGTTTG
TM40648	TTTTGGGTTGTTGGGTGTTT	CCAACATTCCACTTTCATGCT
TM40653	TGAATCGTGGAAATCAAGCA	TGCTCCTCATGTTTTGTTGG
TM40658	TACGCAATAAATGGGGATGG	GATCCTGATGGAGCTCTCACTT
TM40667	TTTCCCGAAAGGAAACCTCT	AAGTGGCTTTTTGGATGTGC
TM40678	CAAGCCTGAGTGGATACGTG	GCCCGTCGCTAAAACCTAAT
TM40680	CCACTCTCTCTCTTCCCCTTT	TGGTGACCAATCCCTAATTTT
TM40683	CAACAAATTCGGACCTCGAT	GAATTACAGTACCACCCCCAGT
TM40692	GAGAGGAACAGAGAAATTTAGAGTGAA	ATCTGCGGCTCCAAACTTTA
TM40695	TTAACACCCTGTTGCACTCG	CCTTTGTATTGAAGATGCGGTA
TM40697	CCAAACAAGTTGGGGATGAC	TTCTCTCCTGGACGGATGAC
TM40699	CGATTTTGGGCTCTGATACC	CCTAATTGTATACCCCACCCAAT
TM40881	GGTTCAGTAGGTGGCGTCTT	CCCTTTGGCTGGTGGTATAA
TM41019	CCAAACCGAAAACAAATCAA	TGAGACATACACTGCAAGCAAA
TM41031	GCATGAAATTGCGTACAAGG	CGAGTCCTGCTCAGGAGAAT
TM41034	CCTTTAGTCAAACGATCAACCA	TTCCTGTGACAACAGTGCAA
TM41053	GAGGATCGCACCACATACCT	GCAGCTCACCGTAAATTCCT
TM41072	AGTCGCCATTGTTTTTCTGC	TCGCGTTAATGGAGAAGGAG
TM41080	TCTAGTTGGGAGGCACTGCT	GTGCCTTGCCTAGGTGTGAT
TM41083	TTTGGACCCAACAAGCTCTC	TGTTGGCCAGGAAAACTACTG
TM41088	GGTTTTTCGTGAAGATGTTTTG	CGTGTTCGTGCCTTTTTACC
TM41090	GTGCGGTCTCACAAATTGAA	GGATTGGTTATAAGTGGTGATCAAA
TM41172	CTGCACGTGAGAGGCTTGTA	TGCGTGTAAATTGACCAAAA
TM41226	ATATGGCTCACCCAGTCTCG	CGTCAAAATCGAGCACGTAG
TM41241	GCTCCTAGCTCCTCCTCCTC	AAACCCCATTTGGCCTAGTT
TM41243	GATAACGAAGGCTTGCTTGC	GGATTTGTATCACCGACCTCA
TM41244	TGAGGTCGGTGATACAAATCC	CGGAAATTCGAGCATTATTCA
TM41247	GTACCGACGTGAAATCATGC	GGGTGGGACTCTCGATTTTA
TM41262	TTGGATTTGCTCGGTATTTTG	TGTAACTGCCGAGCCTACCT
TM41277	GCTTCTGTACAGCACCACCA	TTGGGCTCAACCATCTTACC
TM41278	TGTGATTCATTCACCGTTGG	CACTCGGAGCAACAATAGCA
TM41281	GATGAGGAGGTTGGTGAAACA	CAATTTTGGGTACCAAAGCAA
TM41412	TGCGTCTAAGGGAGGAAGAA	GTCCTGGGTGAAGCAGAATC
TM41469	ATAGAGACGGGCATTCTTTTT	TTGCTCCCCTATTTGATGCT
TM41479	AATTCTAACCATTGGGGCATT	TTCCTTCACATTTTCATTGGTG
TM41480	GGGTCGTCGTCGTTATTGTT	CCTCCTTAAGAGTGCCCTTAGTC
TM41576	AAGCTAGCATTGCTTTGAATCAC	GCAGGTTAAGGGGTTCACTG
TM41675	GGAGGGGAGATGATAAAGAAAAA	TGTGGGGTGTGACTTTGAGT
TM41687	GAGGTAACGTTGGGTCGAAA	AATTTTTGTTCTCGCCACTGA
TM41712	CAAAAAGGAGCTCCAACACC	TTTTTGGGGACAAGTGGAGT
TM41713	TTAGAGTCTCGCCGATTGGT	CTCTAACAGGGGGCTCAGGT
TM41716	GCACCCCTGGTTTGTATGTT	TTGGATTTGGGAGAGGGAAT
TM41730	CAGAACGTGGTAGGCTCCTC	CGAAACAATCCGAAAATCTGA
TM41973	TCGATTTCCTTTCCTTTCTTGA	GCATTTCACGACCTCCAAGT
TM41983	CTTGTTTGCCACAGAAACCA	CCCATATTAGGGATTTTCACG
TM41985	CATGACAAAAATTCACCACCA	GGGATTTTAGCTGAGGCATTT
TM41986	TTGCAGATCCCATTGCATTA	GCTAACTGTACGCCGGAATC
TM41988	ATCAGTGAAGCACCCACGAT	CGGAAAATTCATGTGGCTTA
TM42109	CAGACACAAGTCTGCAGAGGA	CTGCCACTGAATGATTGGTT
TM42114	TGCTAGGCATATGGAGCATTT	TGAAGCAATATCCCCATGAA
TM42120	TTCTCTCGTTCAACCATTTCC	GCGCTCATTTTTGCCTACTC
TM42121	CGCTTTCTGTGAAGACACCA	AACTTTGGAGTGCCAAATCAA
TM42126	GCCAAATTATCACCCCATGT	TCTAAAAGGAGGGGGTTGGT
TM42128	CGGTCGACCCAATAACTTACA	CTCTCAAACCCCCTGTTTCA
TM42131	TTATCAGAACCGCATGCAAA	CGGAGCTCTCGATTATCCAA
TM42132	TGGCCACTAATTATTCATAGCA	GATCCGGTCATGTTCATCCT
TM42139	GAAGGGTCAATTTTGGTGTGA	CAGGGGTGCAATGTAGACAA
TM42141	GCGGCACATTTCCATTTATC	CACAAATGGTGTGACGGAAG
TM42142	GATGGCGTGGACATCTCTAAA	GCCGGATCGTTACAGATTGA
TM42145	CGATATGTGAGACATTGCTCCT	TTGGTTATCCGACACAGCTTC
TM42146	CCATCTACATTTGCATGACTTGA	CTGATTCCTACACCAGGGAAA
TM42150	CCAAATCTAGGATTGCTTCCTT	CGGAGTCACCGATCAGAGTT
TM42157	GTTAAACCTTAGTTGAATAGCAGCA	CAAGATGAAGCTTGCCATGA
TM42172	CTCGCCATACCACTCCATCT	TCCAGCCTAAACTTTGGGATTA
TM42173	CCAATTGGCTTCATAGTTGGA	GCTCGGGTCGTTACAGAAAT
TM42181	TCCTTCCCTAGATCCCACTG	GCATGCGAGTCTTTGAGCTT
TM42183	CTTGTTTCAAGGGTGACCAAA	TCCGTCCAAGAATCTGATGA
TM42193	GTGTGTGTGTGTGGGTGCAG	TCAGTTGCTCCCTGTTGCTA
TM42213	CAGCTAAGCCCCACCTACAA	CACCAAAATCGTAAGCTCAACA
TM42217	CAACTGCCGGAATTTTCTGT	AAGGATCTCCCTCCTTTGTCA
TM42222	CGCGCACCTGGTAAGTTT	GACACACCAGGTGGTTAGGG
TM42230	GGGCAAGGATAAGGCATATT	TCGAGCCGAGCAAAACTATT
TM42235	CAATTCTAGCCGTCTGTTGTTTC	GCAGACATCATCGAACTCCA
TM42240	CACGTATTGTGATTGGGTAATTG	CGGTTGATAGCGCCTCATA
TM42241	GGTCTTGGTGAGCTCGATTT	TACCAGGCAGCCTCATTACC
TM42247	TGGTCCGCTTTTCAACTTTC	GCCACAAAATGTTTCAATGG
TM42251	GGTCCATATATTGCCAAATGC	TGCTTAATGCGTAGGCTGTG
TM42259	CGGAACAACCTTCCCTTGAT	AAGGTTCCCGAAGCTTTGTC
TM42269	TGAGAGGCTTCATGCATTGT	GGCTTCACTTGGATTCGTGT
TM42276	CGACCTACTTCGGTCAGAAAA	CCATTGCATCAGCATGAGTC
TM42278	GGGAAATAGTCGTATCGTGAGC	TGCAAGACTCCATGCAACTC
TM42280	TGAGCGTTGTCTTAGAGGAACA	GGACATTCTGAAAGATTTTGGTTC
TM42281	GAAACAAAGGGGTCTGCTTG	CCTCCGTACGGTTTTCTCAA
TM42288	CGCGAATGGCAGTCACTAT	ATGCGTCCTTCAAATTCCAT
TM42298	CCAGCCAGCTTTCTGTTCA	CATTCTCCAGCATGCAACAA
TM42309	ACCGCCACAAAAAGAAACAA	GGAAAATATGGAGGGAGACCA
TM42311	TGGGGTTCAGGAGATCAAAA	TTCGGAGAAGTTAGGGTTGTG
TM42312	GGATAGCATGCCCCTCATAA	TGTCATGATTCTGCGTCCTG
TM42363	TACTCCCACGTCATTGACCA	CTCCCTTGGGCTAATTCTGA
TM42540	GGGAGCACATGAGAAATGGT	GGAAAGGAACGAAATGCAAA
TM42592	TCACCACAATCTTCCCCTTC	TTGGGACTACTTCTGGCATTTT
TM42612	ACATCACCATGCCTTCTTCC	CCATCTACCTTGGCCAAAAA
TM42617	GGCACTTCAGCCACAAGTTT	TTCTTGAAAGTCCGAATCTGC
TM42631	CGTGCCTCCTTGATCAATTT	CGTCAACCGTTGGATTCTC
TM42633	GGGGTGCCCCTATGATAAAA	AAAGGAGAAGGGTTGGCACT
TM42637	CCCGAGACCACTAAACTTCG	GGTGATCTTCCTGACCCTGA
TM42649	TGTGGAGCTCCTTTCTTTGC	TGCAAATTGCCCTGATACAA
TM42658	TCCTCTTTGCCTCCAAACAC	GGTGGACCCAAAAAGAGAAA
TM42659	GCCCCGTCTGTTCCTTTAAT	TTATACCAGTCGCGCTCCTT
TM42672	GGCACTGATTGAGTTGAAGGA	CAAGTCATCAACGCACGGTA
TM42678	GCAATTCAACAGCAATGGAG	TGCCCTGCTATCCTTTCCTA
TM42683	AAGCGCCACAATACTTCACC	GGCGAGTCATCACATAAGCA
TM42684	GGACAAAGTTTTTGGCCTGA	GCTTGCATGGCAAGTAGTGT
TM42722	CAACTTGCATTTGCCCTTTT	TGATGCTAGCCTTACCTATTCCA
TM42724	TCCGAATTGGGAAGGACTAA	TGGCAGCAATGGTTTGTCTA
TM42729	TCAGACAAAAGCGAACATCG	CGCTTCAGAAACGCAATGTA
TM42843	GGGGGCGGATCTATGTATTA	AAAATGGGTTCAAATAGGAGGA
TM42849	CAGCTGGGATGAGCTTTGTT	CATTCCTCACAACAGGGAAAA
TM42855	AGCCAGCGTGCTATTGATTT	GAGGGCGGAGAAATGAAACT
TM42864	AAACACACCGAGCCATTTTT	CCACCATCTCTAGCGTCTCC
TM42871	ATTGCAATTCCCACCAACAT	GCGGGGACATCTGATAAAAA
TM42965	TGCCCTTTTTATTGGATGCT	TCCGGGGAAATCCAATTAGT
TM42971	CAACTACCAAAAACATCCCAAA	AACTCTTGGGTGGTGGACAG
TM42972	CCTCGTCTTGCATTTGCTTA	CGATGGATTTGAGCAAGGTT
TM42992	CTGCAATAGAGGTGCGATGA	TCCTCATTTCATCGGGTATG
TM43028	AAAAAGGCATGGGAAAAAGC	CCCAAGGGAACATGGTTAAA
TM43052	GAAAGGTCCCTCGCACATTA	ATGGTGGTTCTTTTGGGTCA
TM43060	GGACTGAAGGGGGATCATTA	GCTCGATCAAACCCATCATT
TM43247	CATGCATAGGAATGCCAGAA	CGTAGGGTCTGCTATGTGGAA
TM43262	TAAAGCTGAGAGGGCAGGAA	CCATCCCCTAGGTTGTCTCA
TM43278	TGCAACCCCTGTTGTATGAA	GGAATAGCGTGACGGAAAAG
TM43492	TACTTTTAGCCGCTCCCAGA	TTTCATGAGGATCAAATCCAAC
TM43839	TGACGGCATTGAGTTATTCG	GCCTCCATGACCACCTTCTA
TM43849	GGAAACCTCAACACATGAATGA	ACGATTTGCAAGCTCCATCT
TM43937	ATGCCGACTGGTACCAAAAA	TGGACTCGCGAATTCAGTAT
TM43940	TGAAATCCTTCAAACACAAACG	GTCCGGCTAAAACAGGATCA
TM43943	CACGGTACTGGTGCAGGTTA	AAGATGCGCGAGTCAAAAAT
TM44180	GTTGATCGAATTGTGAAAACCA	TTTTTCCCCCAAACTCTCTTT
TM44603	CCATCTTGGTTCAACGACCT	TCTGTCAACCGACTTTCTGG
TM44952	TGGCGTATCAAAAGGGATGT	ATGTGAGGAGAATGGGGAAA
TM44961	TGTTGAGTTGACCCTCAAAGG	GGACGAAAGTAACGCTCGAT
TM44963	CGGCGTACCAAAAGAAATTG	CTGGACACGAAGCTCAAGGT
TM44973	CCTAAACTGCTTGAACGTGGA	TGTCCACTTTGTTTTCTCCAAA
TM44981	TTGGTTGTGCTTTATGCTAGACTC	GTTGTTGGCCGCAATAGTTT
TM45023	GCGCCATCAAGACCATTTAT	ATGTTCATTCGTGTCGCAAG
TM45027	GCCGGAACAGAGAAAGGAAT	GGCTTCTGGTAGCTTTGTGC
TM45029	GCTTTGCTGAAGAGAGCTTGA	TTCCCACACCATGATTTTGA
TM45030	TCCACAGAAGCATTTTCACA	AATCAAAGTGCGGCAACAGT
TM45034	ACGGAAAAACAAAACGGCTA	CCTCGCGAGATCACGATAC
TM45038	GGTGCATCCCATGGTAATTT	AATCGCCTTTGTTGGACATT
TM45385	ACATGAACGTTTAGCCTTCG	TGTTGGAATCAAAAAGTGAGGA
TM45417	TTGCAAGCATTTTGAAGTGG	GAAGGGTTTTCTGCAGATGATAA
TM45434	AAATTCAAAACGCGTCTGCT	TTGTATTGCGCATGGAACTT
TM46088	CCAAATGCCCAAATCGATAC	GCAAGACTGGCTCCTTCTCT
TM46106	AGTTACCCACCTCGAATCCA	GCCTAACTGAAAACTGCCAGA
TM46189	TCGCTAAAGGGGTTCAAAAA	GGGGTGGATTTAGGTGTGTG
TM46304	AAGACAAGCACCGACAAAGG	GAATTATGCGGTGCACATTG
TM46422	CAATGCCTTCTGCAACTTCA	AACCCTACCAAACACGATGC
TM46530	GCAAAAAGTTGCTCGTGAGG	TTATGGGTTGCAAAATGGAA
TM46552	TCGTTTCAGCCGTATCACAG	GGCAAAATAGGACAAGAACTCAA
TM46645	AAGAAACGACGACGACGAAG	ATTTGGCCTGAAATGCATGA
TM47279	CTAATGGGACCAACCGAAAA	TGCAACCTATGGGGTTCACT
TM47302	CGCGGACCTAAGATTTGAGA	CTGCCAACATGTTCAGACCT
TM47363	GGGAAGCATGATACCTTGTGA	CAAGGTGTAATATCGACGCAAT
TM47386	CGCATTTTGTGGTCCTTCTT	CAAATAGCCAGCCGGATTTA
TM47400	GTGGCCTCAAAGAAAGGTCA	ATGAGCGGCTATTTGGGTAA
TM47427	AATGTTGCGAGAGGCAGAAT	CGCCTCAACCAACAAACTTA
TM47447	GGAAACGTTCACGAAAAGGA	CCCACAAATTTTCCATCACC
TM47453	AGCGACAGCAGCTGAAATG	CCCCTCTCTTTCTCCATGTG
TM47470	TAGGAATTGGGGATGAAGCA	GCATGCATGTATAATGGATAGCAA
TM47474	TCAGCATAACGCCCAATACA	TGGGGGATTCATCTGTTGAT
TM47500	TGGACAACAAGCTATCTGCAA	GAATTGGGCCCGCTATATTT
TM47501	GTGGAAAAAGGCACGGAATA	TATGGATTGGGTCCGATTTG
TM47559	TGACTATTCCCCGGAGCTAA	GGCCAGTCATGCTGTTCTTT
TM47564	GCAAATGCCCCGATAGATAG	GGAGAACTACAGTACCCCAGCA
TM47569	CAAGCCTAATTGAGCAAAGC	GGGAGCTCATTTGTGAAAGC
TM47704	TCCTACCAAACGATCTTGTAGTGT	TGAATCCTTATAAGCCCACAGG
TM47713	CCCCAGAGATGTCATTTTTCA	AGGTGAGTCAGATGGGATGG
TM47747	TTGAGTGAGAGTGGGGGATG	TTCGTTGTTTCGTCGTCAAG
TM47761	CCGAGAGGACATTCCATTTG	TTTTCTGCCATTCCACGTACT
TM47946	ACACACACCCGACCTTTAGC	TGTAACATGGTCGGTGAGGA
TM48299	TGAACAACCACTGCACCCTA	TCCAAAGGGAAGTTGAGGTC
TM48321	TTGAATTGGAACCCTAAACCA	TAATATCACCACCGCCCTTC
TM48339	TGCAACAACAAACTCCCAAA	TTAGTTTGATGTGCCGGTGA
TM48361	CCCCTCGTCTGGATTTGTAA	CTATCCCCACCGGCATACTA
TM48367	TTACTTTGCAGGGGTCGTTT	CATTGACATCCCCAGTGAGA
TM48370	CCAAGGGGTGTCACAGAAAA	CCAAAGGCCAAATGAGAGTC
TM48374	GGGGAAATAGATCAGGTTGC	GATTCATCGGGTGAAGGCTA
TM48456	GCCGGGTCATTTGAAGTAAG	GAAACCATGCCCTAGGACTTATC
TM48463	TCGGAAGTCGGCTTAACAAT	CGCAGAAACTCAAAACCACTC
TM48552	GGGCTGTATGCCTCATCATT	GCAAATACGGGGCAAAGTAA
TM48553	TGAAGTGTTCCCCAGATTCA	TTGCTTGTGCCACTGCTAAC
TM48554	ATCCATTTCGTGTGGTTTCC	CAAATCACCCTCCCTCATGT
TM48556	TCCCTTCCCAAAGAGTTCAA	TCTTGCTGACACAAACTCCAA
TM48583	ATGTAATCACCCCCATCCAA	GACCTCTGTCAGGGCACCTA
TM48601	ATTAGCAACGCCATTTTTGC	GCAGCAGCTGAAGATTTGAA
TM48729	GTATCCTCTGGGGACGTGAA	GATATGAGTTCCCCGCCATA
TM48842	GGAAATACCAAACCAGTCCAA	TTTTCCTGTTGCCATCATCA
TM48854	GGAATGCAGAGATCGACGAA	TCAATGGGTTTAACTGCTTCAA
TM48872	ATTTGGGGAGATGGGATGTT	AAAACCCCTCCCAAAACACT
TM49359	TCCTAGCTGTGCTTGGATCTT	GGATAGCCAAAAGGGGATTG
TM49382	GCCTCTGAATTGCCTGAACT	CCTCGACCAATATGGGACAT
TM49442	TTGGTCATTTGGAGCTAGGTG	ACCAGCCGGGTTTTTACATA
TM49449	TATGCCACAAACCCAAACCT	GCCAGGATACAATTGAGGAAA
TM49450	TATTTTCCGCAGACCTGACC	TTTCCATCACCATTCATCCA
TM49547	GCGAGACGCTATGTCATTTG	ATGGCCTTGTCGGTCTTATG
TM49768	CTAAGCTTTGGGAGGGGATT	TCCATTGCGTTATTTTGTGG
TM49972	CGGCTGATGGTATGCATCTT	TACATTGCAGCCGTGAACAT
TM50158	ATGGAAATAGCCTGCCTGAT	TCTTTCCGGGGACAGTGTAA
TM50180	GTCTTGAGGTACGGGGCATA	TTGCATGCTAGTCATCCCTTT
TM50185	TTGATCCGCTTTCTACTCCAA	CGGTTTCCTCTGTACGGAAC
TM50196	GGACTCTTAAGTCCAGAGCAAGTC	TCCGTCATACCAATAAAAACCA
TM50212	TGCTACCATGTTGGATGTGTG	TTGGTCCGATGGTTTTGATT
TM50214	CGCAGCTGAAAACATTCAAA	TCTCCTGAGAGGCTGAGACC
TM50217	TAAGGAGGGACGAACATTGC	CCCTCTTCAAAGTCGCAGAT
TM50221	TCGGGTACTAGAAGGGACGA	GTTCTTACAAATAACAGCGACATGA
TM50238	GTCCCGGGAAACTTTTTCTT	CGTTATCTAGCCGGGGATCT
TM50239	AGGACCTGATTCCTCGGTTT	TTTGCAGTACGCTCAGCATC
TM50260	GGCAAGACTCACCTTGCATT	TCCCCTTTATTATCTCCAATCA
TM50268	GTGGGCGTATGCAAGAATTT	ACTTTGCTTGAAGCGGTGTC
TM50289	CAATGGAAACCGTACCAAAAA	TACCTTCCTCAAACCCCACA
TM50303	TGCACCTAGTGTTTTGCATCA	TCAGTCGTTTTCGTTTTCCA
TM50311	GCCTCCATTTTCCTCAATCA	TAGTCAGTCGCGGAGTCAGA
TM50356	TGGTGGAACCAGAAATTTGA	TGATTGCCAGCCTTTTGAA
TM50371	GATGAGGTACATGCGCAAAA	GGTGGAGGAAAAATCTGTCG
TM50584	GCTGCAAATATATCGAAAACGA	CGGTACGTAGCATTAGTTTGAA
TM50780	TGGGTCCGCCACTAGTAAAA	ACCCCGCTTAGAACTGCTTT
TM51071	ATCACTAGGGCTTGGTGACG	GGTGGTGGAATTGCAGTTTT

## Sheet: 2 markers
Supplementary Table 2 Summary of three types of markers for QTL mapping analysis in 24 linkage groups
Linkage group	Number				Length	Average Length (cM)	Max gap
	Bin Marker	SNP	Indel	SSR	(cM)		(cM)
LG1	91	78	4	9	121.79	1.338	3.51
LG2	115	99	4	12	156.67	1.362	3.14
LG3	93	85	5	3	129.23	1.39	8.55
LG4	88	81	1	6	111.64	1.269	4.07
LG5	76	69	3	4	112.76	1.484	3.7
LG6	113	97	7	9	175.78	1.556	18.72
LG7	103	92	5	6	169.84	1.649	22.2
LG8	82	72	1	9	138.38	1.688	23.79
LG9	83	66	6	11	120.9	1.457	5.55
LG10	80	68	3	9	119.67	1.496	8.95
LG11	63	50	2	11	104.14	1.653	6.87
LG12	98	87	2	9	161.12	1.644	19.57
LG13	79	72	4	3	142.77	1.807	27.58
LG14	113	102	4	7	167.2	1.48	4.44
LG15	91	89	1	1	136.6	1.501	6.12
LG16	133	122	3	8	198.21	1.49	3.33
LG17	103	95	3	5	165.94	1.611	6.67
LG18	68	67	1	0	111.85	1.645	4.62
LG19	101	95	4	2	155.94	1.544	4.07
LG20	85	72	4	9	136.98	1.612	6.11
LG21	60	57	0	3	100.06	1.668	5.18
LG22	98	89	3	6	163.35	1.667	4.81
LG23	84	77	5	2	153.6	1.829	5.55
LG24	39	37	1	1	74.94	1.922	10.28
Total	2139	1918	76	145	3329.36	1.557	27.58

## Sheet: 3 QTLs
Supplementary Table 3 QTLs detected for six traits in RIL population
Trait	QTL	Linkage group	M-	M+	Position (cM)	Support interval (cM)
nPH	qnPH2	LG2	SNP_0000801_315871	SNP_0066469_566	24.2	23.6-25.2
	qnPH4	LG4	SNP_0007190_2028	SNP_0140466_1599	56.6	56.3-57.6
	qnPH6-1	LG6	SNP_0670676_379	SNP_0000241_439670	7.2	5.9-8.7
	qnPH6-2	LG6	PT50965	SNP_0386058_322	14.3	13.8-15.4
	qnPH6-3	LG6	SNP_0286642_849	SNP_0093952_616	17.6	16.6-17.7
	qnPH6-4	LG6	SNP_0309690_216	SNP_0310889_281	51.7	51.1-52.2
	qnPH6-5	LG6	TM23680	SNP_0000403_34752	166.3	164.7-166.8
	qnPH8	LG8	PT30412	SNP_0039066_2781	4.8	4.0-5.8
	qnPH11	LG11	SNP_0714319_379	SNP_0054012_1160	2.7	0.5-3.8
	qnPH16-1	LG16	SNP_0002222_306173	SNP_0003738_151869	69.8	67.8-76.1
	qnPH16-2	LG16	SNP_0170949_1159	SNP_0168445_715	75.1	67.8-76.1
	qnPH17	LG17	SNP_0005511_103778	SNP_0011456_11326	32.1	31.0-33.8
	qnPH24	LG24	SNP_0079336_1284	SNP_0005704_1444	46.6	46.3-48.1
nLN	qnLN2	LG2	SNP_0008798_12770	PT52570	116.8	115.7-119.5
	qnLN4-1	LG4	SNP_0326187_575	SNP_0137932_236	20.7	19.9-24.0
	qnLN4-2	LG4	SNP_0028874_904	SNP_0031356_188	28.3	26.2-28.4
	qnLN4-3	LG4	SNP_0116131_456	SNP_0012225_18476	74.9	70.6-77.6
	qnLN6-1	LG6	PT50965	SNP_0386058_322	14.3	13.8-14.9
	qnLN6-2	LG6	SNP_0112470_523	SNP_0042518_619	18.8	18.2-19.8
	qnLN6-3	LG6	SNP_0000664_457184	SNP_0000117_506521	155.8	155.1-156.8
	qnLN6-4	LG6	SNP_0000429_113435	SNP_0001513_22645	163.6	163.0-167.1
	qnLN6-5	LG6	SNP_0000428_988866	SNP_0000275_152778	169.8	168.2-170.6
	qnLN12	LG12	PT54184	SNP_0003693_272984	107.4	106.1-109.0
	qnLN15-1	LG15	SNP_0082738_1206	SNP_0276945_1125	100.6	99.3-102.6
	qnLN15-2	LG15	SNP_0007729_119320	SNP_0005375_117336	105.2	103.7-106.2
	qnLN17	LG17	PT51013	SNP_0028456_1780	103	102.4-103.5
	qnLN18-1	LG18	SNP_0003219_2150	SNP_0254930_432	17.5	15.1-18.0
	qnLN18-2	LG18	SNP_0789902_356	Indel_0000781_353183	24.6	23.0-24.7
SG	qSG6-1	LG6	PT50965	SNP_0386058_322	14.3	13.3-14.9
	qSG6-2	LG6	SNP_0000664_457184	SNP_0000117_506521	155.8	154.6-156.8
	qSG12-1	LG12	SNP_0000621_367678	SNP_0000638_504806	113	111.4-114.1
	qSG12-2	LG12	SNP_0037198_2246	SNP_0000482_435304	134	131.6-135.0
	qSG12-3	LG12	SNP_0011042_46018	SNP_0001552_494076	140.4	138.4-142.1
	qSG16-1	LG16	SNP_0005468_104041	SNP_0000586_470275	8	6.9-11.3
	qSG16-2	LG16	SNP_0000733_704728	SNP_0094797_318	12.9	12.1-15.6
	qSG16-3	LG16	SNP_0230812_565	SNP_0000431_102602	28.2	25.8-29.2
	qSG16-4	LG16	SNP_0010215_6541	SNP_0001002_556494	30.4	29.3-33.0
	qSG19	LG19	SNP_0054462_550	SNP_0369648_780	114.6	113.0-115.1
	qSG24	LG24	SNP_0005704_1444	SNP_0109891_1320	48.2	47.6-49.2
IL	qIL4	LG4	SNP_0019897_4729	SNP_0201693_891	50.7	49.7-51.7
	qIL6-1	LG6	PT50965	SNP_0386058_322	13.8	10.9-17.1
	qIL6-2	LG6	SNP_0173147_516	TM41716	30.4	29.1-31.7
	qIL6-3	LG6	TM23680	SNP_0000403_34752	166.8	165.8-167.1
	qIL8	LG8	SNP_0157882_165	SNP_0000426_813146	105.4	104.8-106.4
	qIL10-1	LG10	SNP_0491073_467	SNP_0013168_2682	86.1	85.0-87.1
	qIL10-2	LG10	SNP_0210661_996	SNP_0154978_288	96.4	95.3-97.4
	qIL16	LG16	SNP_0010215_6541	SNP_0001002_556494	30.4	29.3-32.0
	qIL24	LG24	SNP_0010381_2221	SNP_0006078_4080	44.2	43.0-45.2
LL	qLL2	LG2	SNP_0264889_695	SNP_0197325_982	145.2	142.6-147.2
	qLL4-1	LG4	SNP_0518159_276	SNP_0003431_14585	69	67.4-70.6
	qLL4-2	LG4	SNP_0001310_519614	SNP_0002668_237960	99.5	96.9-101.5
	qLL6-1	LG6	SNP_0386058_322	SNP_0570422_523	14.4	13.3-15.4
	qLL6-2	LG6	SNP_0000296_289859	SNP_0000428_988866	168.7	168.2-170.3
	qLL7	LG7	SNP_0003436_1901	SNP_0001146_238477	63.6	51.7-64.9
	qLL9-1	LG9	SNP_0420790_642	SNP_0122379_911	44.3	40.1-46.5
	qLL9-2	LG9	SNP_0062237_306	SNP_0000219_709183	119.6	118.3-120.6
	qLL12	LG12	SNP_0001977_431658	SNP_0010862_6406	69.4	64.9-74.4
	qLL13	LG13	SNP_0269413_773	SNP_0171371_1397	141.7	139.9-142.7
	qLL24	LG24	SNP_0005704_1444	SNP_0109891_1320	48.2	47.1-50.3
LW	qLW2	LG2	SNP_0004013_64254	SNP_0167553_683	140.4	138.8-141.5
	qLW4	LG4	SNP_0019897_4729	SNP_0201693_891	51.2	50.7-51.7
	qLW6-1	LG6	SNP_0670676_379	SNP_0000241_439670	7.2	6.4-9.7
	qLW6-2	LG6	TM23680	SNP_0000403_34752	166.3	165.8-166.8
	qLW7	LG7	SNP_0040850_945	TM27284	129.2	128.1-130.7
	qLW8-1	LG8	PT30412	SNP_0039066_2781	4.8	4.5-5.3
	qLW8-2	LG8	SNP_0000164_1164849	SNP_0360277_417	20.3	18.6-21.6
	qLW10	LG10	SNP_0137195_1422	SNP_0064953_379	2.5	0.0-5.0
	qLW22-1	LG22	SNP_0024716_457	SNP_0017179_8271	59.2	59.1-60.2
	qLW22-2	LG22	TM42230	SNP_0007796_98021	66.1	60.3-69.1
	qLW24	LG24	SNP_0005704_1444	SNP_0109891_1320	48.2	47.1-50.3
Notes: 1) QTL was named in the form of "q","Trait","LG","-Rank", for example, qnPH6-1 denotes a QTL of PH which is the first QTL on the LG6 ; 2) M-, M+: flanking markers, of which markers whose name begin with TM and PT denote SSR. 3) Traits abbreviations: nPH for natural plant height; nLN for natural leaf number; SG for stem girth; IL for inter-node length, LL for length of the largest waist lea…

## Sheet: 4 QQ qq
Supplementary Table 4 Superior lines predicted by full genetic model for six traits
Trait	QTL	GSL(+)	SL(+)1	SL(+)2	SL(+)3	SL(+)4	SL(+)5	SL(+)6	SL(+)7
nPH	qnPH2	qq	qq	qq	qq	qq	qq	qq	qq
	qnPH4	qq	qq	qq	qq	qq	qq	qq	qq
	qnPH6-2	qq	QQ	qq	qq	QQ	QQ	qq	qq
	qnPH6-5	qq	qq	qq	qq	qq	qq	qq	qq
	qnPH11	qq	qq	qq	qq	qq	qq	qq	qq
	qnPH17	QQ	QQ	QQ	QQ	QQ	QQ	QQ	QQ
	qnPH24	QQ	QQ	QQ	QQ	QQ	QQ	QQ	QQ
	qnPH6-1	QQ	QQ	QQ	QQ	QQ	QQ	QQ	QQ
	qnPH8	QQ	QQ	QQ	QQ	QQ	QQ	QQ	QQ
	qnPH6-3	QQ	QQ	QQ	QQ	QQ	QQ	qq	QQ
	qnPH6-4	QQ	QQ	QQ	QQ	QQ	QQ	QQ	QQ
	qnPH16-1	qq	qq	qq	qq	qq	qq	qq	qq
	qnPH16-2	QQ	QQ	QQ	QQ	QQ	QQ	QQ	QQ
nLN	qnLN4-3	qq	qq	qq	qq	qq	qq	qq	qq
	qnLN6-1	qq	qq	qq	qq	qq	qq	qq	qq
	qnLN6-3	qq	qq	qq	qq	qq	qq	qq	qq
	qnLN17	QQ	QQ	QQ	QQ	QQ	QQ	QQ	QQ
	qnLN2	qq	qq	qq	qq	qq	QQ	qq	qq
	qnLN4-2	QQ	QQ	QQ	QQ	QQ	QQ	QQ	QQ
	qnLN4-1	qq	qq	qq	qq	qq	qq	qq	qq
	qnLN12	QQ	QQ	QQ	QQ	QQ	QQ	QQ	QQ
	qnLN6-2	QQ	QQ	QQ	QQ	QQ	QQ	QQ	QQ
	qnLN6-4	QQ	QQ	QQ	QQ	QQ	QQ	QQ	QQ
	qnLN6-5	QQ	QQ	QQ	QQ	QQ	QQ	QQ	QQ
	qnLN15-1	QQ	QQ	QQ	QQ	QQ	QQ	QQ	QQ
	qnLN18-2	QQ	QQ	QQ	QQ	QQ	QQ	QQ	QQ
	qnLN15-2	QQ	QQ	QQ	QQ	QQ	QQ	QQ	qq
	qnLN18-1	QQ	QQ	QQ	QQ	QQ	QQ	QQ	QQ
SG	qSG6-1	qq	qq	qq	qq	qq	qq	qq	qq
	qSG6-2	qq	qq	qq	qq	qq	qq	qq	qq
	qSG12-1	qq	qq	qq	qq	qq	qq	qq	qq
	qSG24	QQ	QQ	QQ	QQ	QQ	QQ	QQ	QQ
	qSG12-2	qq	qq	qq	qq	qq	qq	qq	qq
	qSG16-3	QQ	QQ	QQ	QQ	QQ	QQ	QQ	QQ
	qSG12-3	QQ/qq	qq	QQ/qq	QQ/qq	QQ/qq	QQ/qq	QQ/qq	QQ/qq
	qSG16-4	QQ/qq	QQ	QQ/qq	QQ/qq	QQ/qq	QQ/qq	QQ/qq	QQ/qq
	qSG16-1	QQ	QQ	qq	QQ	QQ	qq	QQ	QQ
	qSG19	QQ	QQ	qq	QQ	QQ	qq	QQ	QQ
	qSG16-2	QQ/qq	QQ/qq	QQ	QQ/qq	QQ/qq	QQ	QQ/qq	QQ/qq
IL	qIL4	qq	qq	qq	qq	qq	qq	qq	qq
	qIL6-1	QQ	QQ	QQ	QQ	QQ	QQ	QQ	qq
	qIL6-3	qq	qq	qq	qq	qq	qq	qq	qq
	qIL10-1	QQ	QQ	QQ	QQ	QQ	QQ	QQ	QQ
	qIL24	QQ	QQ	QQ	QQ	QQ	QQ	QQ	QQ
	qIL6-2	QQ	qq	QQ	QQ	QQ	QQ	QQ	QQ
	qIL10-2	QQ	QQ	QQ	QQ	QQ	QQ	QQ	QQ
	qIL8	qq	qq	qq	qq	qq	qq	qq	QQ
	qIL16	QQ	QQ	QQ	QQ	QQ	QQ	QQ	QQ
LL	qLL4-2	QQ	QQ	QQ	QQ	QQ	QQ	QQ	QQ
	qLL6-1	qq	qq	qq	qq	QQ	qq	QQ	qq
	qLL6-2	QQ	QQ	QQ	QQ	QQ	QQ	QQ	QQ
	qLL7	QQ	QQ	QQ	QQ	QQ	QQ	QQ	QQ
	qLL12	qq	qq	qq	qq	qq	qq	qq	qq
	qLL13	qq	qq	qq	qq	qq	qq	qq	qq
	qLL24	QQ	QQ	QQ	QQ	QQ	QQ	QQ	QQ
	qLL2	QQ/qq	QQ/qq	QQ/qq	qq	QQ/qq	QQ/qq	QQ/qq	QQ/qq
	qLL9-2	QQ/qq	QQ/qq	QQ/qq	QQ	QQ/qq	QQ/qq	QQ/qq	QQ/qq
	qLL4-1	qq	qq	qq	qq	qq	qq	qq	qq
	qLL9-1	QQ	QQ	QQ	QQ	QQ	QQ	QQ	QQ
LW	qLW4	qq	qq	qq	qq	qq	qq	qq	qq
	qLW6-1	QQ	QQ	qq	QQ	QQ	qq	QQ	QQ
	qLW6-2	qq	qq	qq	qq	qq	qq	qq	qq
	qLW8-1	QQ/qq	qq	QQ/qq	QQ	QQ	QQ/qq	qq	QQ/qq
	qLW10	QQ	QQ	QQ	QQ	QQ	QQ	QQ	QQ
	qLW24	QQ	QQ	QQ	QQ	QQ	QQ	QQ	QQ
	qLW2	qq	qq	qq	qq	qq	qq	qq	qq
	qLW22-1	qq	qq	qq	qq	qq	qq	qq	qq
	qLW22-2	QQ	QQ	QQ	QQ	QQ	QQ	QQ	QQ
	qLW7	QQ/qq	QQ/qq	QQ/qq	QQ	QQ/qq	QQ/qq	QQ/qq	QQ/qq
	qLW8-2	QQ/qq	QQ/qq	QQ/qq	QQ	QQ/qq	QQ/qq	QQ/qq	QQ/qq
Notes: 1) GSL= general superior line for seven environments, SL (+)1= superior line for E1 (2018 Shilin), SL (+)2= superior line for E2 (2018 Yanhe), SL (+)3= superior line for E3 (2019 Shilin), SL (+)4= superior line for E4 (2019 Yanhe); SL (+)5= superior line for E5 (2020 Shilin); SL (+)6= superior line for E6 (2020 Yanhe); SL (+)7= superior line for E7 (2021 Shilin); 2) P1=QQ, P2=qq.

## Sheet: 5 QTL Group
Supplementary Table 5 Adjacent QTLs of different traits
QTL	Trait	Linkage group	M-	M+	Position (cM)	Support interval (cM)
qIL4	IL	LG4	SNP_0019897_4729	SNP_0201693_891	50.7	49.7-51.7
qLW4	LW	LG4	SNP_0019897_4729	SNP_0201693_891	51.2	50.7-51.7
qLW6-1	LW	LG6	SNP_0670676_379	SNP_0000241_439670	7.2	6.4-9.7
qnPH6-1	nPH	LG6	SNP_0670676_379	SNP_0000241_439670	7.2	5.9-8.7
qIL6-1	IL	LG6	PT50965	SNP_0386058_322	13.8	10.9-17.1
qnLN6-1	nLN	LG6	PT50965	SNP_0386058_322	14.3	13.8-14.9
qnPH6-2	nPH	LG6	PT50965	SNP_0386058_322	14.3	13.8-15.4
qSG6-1	SG	LG6	PT50965	SNP_0386058_322	14.3	13.3-14.9
qLL6-1	LL	LG6	SNP_0386058_322	SNP_0570422_523	14.4	13.3-15.4
qnPH6-3	nPH	LG6	SNP_0286642_849	SNP_0093952_616	17.6	16.6-17.7
qnLN6-2	nLN	LG6	SNP_0112470_523	SNP_0042518_619	18.8	18.2-19.8
qnLN6-3	nLN	LG6	SNP_0000664_457184	SNP_0000117_506521	155.8	155.1-156.8
qSG6-2	SG	LG6	SNP_0000664_457184	SNP_0000117_506521	155.8	154.6-156.8
qnLN6-4	nLN	LG6	SNP_0000429_113435	SNP_0001513_22645	163.6	163.0-167.1
qLW6-2	LW	LG6	TM23680	SNP_0000403_34752	166.3	165.8-166.8
qnPH6-5	nPH	LG6	TM23680	SNP_0000403_34752	166.3	164.7-166.8
qIL6-3	IL	LG6	TM23680	SNP_0000403_34752	166.8	165.8-167.1
qLL6-2	LL	LG6	SNP_0000296_289859	SNP_0000428_988866	168.7	168.2-170.3
qnLN6-5	nLN	LG6	SNP_0000428_988866	SNP_0000275_152778	169.8	168.2-170.6
qLW8-1	LW	LG8	PT30412	SNP_0039066_2781	4.8	4.5-5.3
qnPH8	nPH	LG8	PT30412	SNP_0039066_2781	4.8	4.0-5.8
qIL16	IL	LG16	SNP_0010215_6541	SNP_0001002_556494	30.4	29.3-32.0
qSG16-4	SG	LG16	SNP_0010215_6541	SNP_0001002_556494	30.4	29.3-33.0
qIL24	IL	LG24	SNP_0010381_2221	SNP_0006078_4080	44.2	43.0-45.2
qnPH24	nPH	LG24	SNP_0079336_1284	SNP_0005704_1444	46.6	46.3-48.1
qLL24	LL	LG24	SNP_0005704_1444	SNP_0109891_1320	48.2	47.1-50.3
qLW24	LW	LG24	SNP_0005704_1444	SNP_0109891_1320	48.2	47.1-50.3
qSG24	SG	LG24	SNP_0005704_1444	SNP_0109891_1320	48.2	47.6-49.2
Notes: 1) M-, M+: flanking markers, of which markers whose name begin with TM and PT denote SSR. 2）Two QTLs were defined adjacent if they:shared at least one overlapped flanking marker(s).

## Sheet: 6 G GE E
Supplementary Table 6 Total phenotypic variance explained by all QTLs for six traits based on QTL analysis model
Trait	PVE (%)
	G		E	GE		e
	A	AA		AE	AAE
nPH	23.27	1	31.65	5.04	0.17	38.87
nLN	42.05	2.57	11.42	1.56	1.66	40.74
SG	15.14	0.76	38.67	2.87	0.48	42.08
IL	8.54	0.9	47.82	1.68	1.35	39.71
LL	5.91	0.48	42.37	4.43	1.04	45.77
LW	11.6	0.49	36.72	4.19	1.56	45.44
Notes: 1) Variance components abbreviations: A for additive effects , AA for additive-by-additive epistasis effects, G for genetic main effects; E for environmental effects; AE additive-by-environment interaction effects, AAE for epistasis-by-environment interaction effects, GE for gene-by-environment intercation effects; e for residual effects; 2) PVE stands for "phenotypic variance explained", …

## Sheet: 7 genotype value
Supplementary Table 7 Prediction of the total genotypic values of six traits in tobacco
Trait	Entry	G	G+GE1	G+GE2	G+GE3	G+GE4	G+GE5	G+GE6	G+GE7
nPH	P1	-20.4412	-13.2447	-33.4693	-28.2571	-14.4715	-13.9207	-23.4701	-15.5255
	P2	34.2562	13.2447	33.4693	28.2571	14.4715	13.9207	23.4701	15.5255
	Superior Line (+)	44.3546	42.4433	57.3826	52.1704	50.3274	41.7673	43.6301	39.4388
nLN	P1	-3.2901	-3.2901	-3.2901	-5.0228	-2.9395	-2.8806	-4.2091	-2.9045
	P2	-3.5533	-3.5533	-3.5533	-4.1552	-3.2027	-3.5533	-3.5533	-2.365
	Superior Line (+)	6.8022	6.8022	6.8022	8.5349	6.4516	6.7537	6.8441	5.6474
SG	P1	-0.655	-0.7547	-1.0906	-0.655	-0.3682	-1.1589	-0.4002	-0.655
	P2	0.5807	0.5807	1.0163	0.5807	0.294	1.0846	0.3259	0.5807
	Superior Line (+)	1.2289	1.3286	1.6645	1.2289	1.3809	1.7328	0.9741	1.2289
IL	P1	-0.076	0.0837	-0.076	-0.2402	-0.0991	-0.0023	-0.076	-0.1255
	P2	0.117	-0.1379	0.117	0.117	0.1401	0.117	0.117	0.2835
	Superior Line (+)	0.7852	0.6077	0.7852	0.9493	0.948	0.8589	0.7852	0.7951
LL	P1	0.0113	0.0113	-2.365	-1.4593	2.6125	-2.3959	2.6236	-0.799
	P2	-4.0121	-4.0121	-1.6359	-7.3891	-3.7554	-1.6049	-6.6244	-4.8224
	Superior Line (+)	6.5509	6.5509	8.9272	9.9279	8.2418	8.9582	8.2529	5.7406
LW	P1	-0.8503	-1.305	-1.6517	1.6817	0.6673	-1.6345	-1.6594	-0.4126
	P2	3.3582	1.0708	1.4175	-0.9563	-1.2442	1.4003	1.4252	0.1783
	Superior Line (+)	5.4382	5.8929	5.2949	7.9701	8.5343	5.2778	6.2473	5.0005
Notes: 1) G denotes general genetic effects of P1(K326), P2 (Y3) and predicted general superior lines; G+GE denotes total genetic effects of P1, P2 as well as the predicted superior lines in a specific environment (E1-E7); 2) Superior line (+) denotes predicted line with maximum positive genetic value by combing homozygous genotypes (QQ,qq) for all significant QTLs.

## Sheet: 8 Candidate Genes
Supplementary Table 8 List of candidate genes for major QTLs
qLN6-1、qSG6-1 (Nt16:8165328 bp..8979225 bp)
geneID	Location (bp)	Description
Nt16g00274.1	Nt16:8165805..8178068	Protease Do-like 10, mitochondrial
Nt16g00275.1	Nt16:8180984..8187740	Probable methylenetetrahydrofolate reductase
Nt16g00277.1	Nt16:8203079..8212993	GDT1-like protein 3
Nt16g00278.1	Nt16:8260125..8275821	Zinc finger CCCH domain-containing protein ZFN-like
Nt16g00281.1	Nt16:8418811..8425909	Endoglucanase 12
Nt16g00284.1	Nt16:8653982..8663163	Type II inositol polyphosphate 5-phosphatase 15
Nt16g00285.1	Nt16:8667939..8673091	Protein ARV 1
Nt16g00287.1	Nt16:8675623..8686385	Acetolactate synthase small subunit 1, chloroplastic
Nt16g00288.1	Nt16:8692652..8700932	Acetolactate synthase small subunit 2, chloroplastic
Nt16g00289.1	Nt16:8719174..8738943	Mitochondrial proton/calcium exchanger protein
Nt16g00290.1	Nt16:8742016..8744466	Pentatricopeptide repeat-containing protein At4g01570
Nt16g00292.1	Nt16:8754848..8755156	Mitochondrial 37S ribosomal protein S27
Nt16g00293.1	Nt16:8770019..8786305	Sister chromatid cohesion 1 protein 4
Nt16g00294.1	Nt16:8788968..8794698	U11/U12 small nuclear ribonucleoprotein 25 kDa protein
Nt16g00295.1	Nt16:8807172..8819436	Beta-glucosidase 42
Nt16g00296.1	Nt16:8820962..8823930	30S ribosomal protein S5
Nt16g00298.1	Nt16:8831039..8854706	Protein transport protein Sec24-like At4g32640
Nt16g00299.1	Nt16:8868363..8877458	HIV Tat-specific factor 1 homolog
Nt16g00301.1	Nt16:8880960..8892254	Stearoyl-[acyl-carrier-protein] 9-desaturase, chloroplastic
qnPH6-5、qLW6-2、qIL6-3 (Nt16:24110108 bp..39896452 bp)
geneID	Location (bp)	Description
Nt16g00740.1	Nt16:24198904..24203298	Protein SENSITIVITY TO RED LIGHT REDUCED 1
Nt16g00741.1	Nt16:24213879..24216624	Protein SENSITIVITY TO RED LIGHT REDUCED 1
Nt16g00742.1	Nt16:24220323..24222090	Protein SENSITIVITY TO RED LIGHT REDUCED 1
Nt16g00745.1	Nt16:24297425..24308672	RNA-binding protein 39
Nt16g00746.1	Nt16:24391916..24394063	Leucine-rich repeat extensin-like protein 2
Nt16g00748.1	Nt16:24411353..24414197	7-deoxyloganetic acid gluc yltransferase
Nt16g00749.1	Nt16:24442700..24445384	Receptor-like protein EIX1
Nt16g00750.1	Nt16:24448479..24448847	Putative receptor-like protein kinase At3g47110
Nt16g00751.1	Nt16:24471942..24485054	Probable LRR receptor-like serine/threonine-protein kinase At3g47570
Nt16g00752.1	Nt16:24485953..24490001	Probable LRR receptor-like serine/threonine-protein kinase At3g47570
Nt16g00753.1	Nt16:24516547..24525714	Protein LIKE COV 2
Nt16g00754.1	Nt16:24567176..24572571	Ribonucle ide-diph phate reductase large subunit
Nt16g00756.1	Nt16:24634925..24637042	Ethylene-responsive transcription factor ABR1
Nt16g00757.1	Nt16:24642605..24660741	26S proteasome non-ATPase regulatory subunit 12 homolog A
Nt16g00759.1	Nt16:24689350..24693659	Protein S-acyltransferase 8
Nt16g00760.1	Nt16:24849931..24857091	Ubiquitin carboxyl-terminal hydrolase 27
Nt16g00761.1	Nt16:24962003..24965362	TSL-kinase interacting protein 1
Nt16g00762.1	Nt16:24993071..24995968	Probable serine/threonine-protein kinase At1g54610
Nt16g00764.1	Nt16:25007695..25021854	Cr sover junction endonuclease EME1B
Nt16g00765.1	Nt16:25102672..25105239	UDP-rhamn e/UDP-galact e transporter 5
Nt16g00767.1	Nt16:25181879..25185520	Systemin receptor SR160
Nt16g00769.1	Nt16:25257798..25261656	Probable WRKY transcription factor 13
Nt16g00773.1	Nt16:25455384..25461874	S-aden ylmethionine carrier 1, chloroplastic/mitochondrial
Nt16g00774.1	Nt16:25463158..25466247	Glucan endo-1,3-beta-gluc idase 8
Nt16g00775.1	Nt16:25521146..25530682	tRNA(His) guanylyltransferase 1
Nt16g00776.1	Nt16:25531337..25534896	Violaxanthin de-epoxidase, chloroplastic
Nt16g00777.1	Nt16:25577548..25583645	Viridiflorene synthase
Nt16g00778.1	Nt16:25628133..25628842	Vetispiradiene synthase 1
Nt16g00781.1	Nt16:25721874..25731713	Purple acid ph phatase 23
Nt16g00783.1	Nt16:25782669..25786945	protein SLOW GREEN 1, chloroplastic
Nt16g00784.1	Nt16:25872994..25893668	RNA cytidine acetyltransferase 1
Nt16g00785.1	Nt16:25895260..25898222	Ras-related protein Rab7
Nt16g00787.1	Nt16:25952960..25983019	Probable WRKY transcription factor 50
Nt16g00789.1	Nt16:25996619..26000079	Small GTPase LIP1
Nt16g00790.1	Nt16:26005196..26036811	Small GTPase LIP1
Nt16g00791.1	Nt16:26066184..26066564	Uncharacterized protein At5g64816
Nt16g00793.1	Nt16:26123325..26124626	Alkane hydroxylase MAH1
Nt16g00794.1	Nt16:26262601..26264127	Alkane hydroxylase MAH1
Nt16g00795.1	Nt16:26268122..26271444	Probable 20S rRNA accumulation protein 4
Nt16g00796.1	Nt16:26281885..26286966	ABC transporter F family member 5
Nt16g00797.1	Nt16:26355538..26366455	Developmentally-regulated G-protein 3
Nt16g00801.1	Nt16:26460224..26464285	Protein YELLOW LEAF 1, choloroplastic
Nt16g00802.1	Nt16:26483434..26489399	Shikimate kinase, chloroplastic
Nt16g00803.1	Nt16:26514554..26515627	F-box/kelch-repeat protein SKIP6
Nt16g00804.1	Nt16:26617909..26619706	Cytochrome P450 78A7
Nt16g00806.1	Nt16:26740012..26740602	Cytochrome P450 78A7
Nt16g00807.1	Nt16:26752314..26761612	Cytochrome P450 78A11
Nt16g00809.1	Nt16:26844213..26846010	Cytochrome P450 78A7
Nt16g00810.1	Nt16:26849421..26849783	Cytochrome P450 78A4
Nt16g00811.1	Nt16:27098759..27108583	Pentatricopeptide repeat-containing protein At4g13650
Nt16g00812.1	Nt16:27114594..27115325	Protein MIZU-KUSSEI 1
Nt16g00814.1	Nt16:27300364..27301329	2-hydroxyisoflavanone dehydratase
Nt16g00815.1	Nt16:27514279..27523628	E3 ubiquitin-protein ligase RKP
Nt16g00819.1	Nt16:27600094..27600705	Nuclear transcription factor Y subunit B-3
Nt16g00820.1	Nt16:27622570..27628008	Protein CPR-5
Nt16g00821.1	Nt16:27631267..27638691	Protein HEAT INTOLERANT 4
Nt16g00822.1	Nt16:27684904..27695949	Protein ACTIVITY OF BC1 COMPLEX KINASE 8, chloroplastic
Nt16g00823.1	Nt16:27802716..27811323	Probable inactive receptor kinase At5g10020
Nt16g00824.1	Nt16:27927091..27947556	Cytochrome P450 71AU50
Nt16g00825.1	Nt16:27960315..27976357	Cytochrome P450 71AU50
Nt16g00826.1	Nt16:27978656..27980201	Serine/threonine-protein ph phatase 7 long form homolog
Nt16g00828.1	Nt16:28148555..28150164	Cytochrome P450 71AU50
Nt16g00832.1	Nt16:28377740..28378348	Cytochrome P450 71AU50
Nt16g00833.1	Nt16:28378396..28379307	Cytochrome P450 71AU50
Nt16g00837.1	Nt16:28925769..28950967	Cytochrome P450 71AU50
Nt16g00838.1	Nt16:29036201..29037976	Cytochrome P450 71AU50
Nt16g00839.1	Nt16:29149503..29157508	Cytochrome P450 71AU50
Nt16g00840.1	Nt16:29180430..29181527	Pentatricopeptide repeat-containing protein PPR5 homolog, chloroplastic
Nt16g00841.1	Nt16:29214739..29217096	Pentatricopeptide repeat-containing protein At2g22070
Nt16g00845.1	Nt16:29331804..29332226	Putative ribonuclease H protein At1g65750
Nt16g00849.1	Nt16:29489452..29494105	TGACG-sequence-specific DNA-binding protein TGA-1A
Nt16g00850.1	Nt16:29495996..29518413	Alanine--glyoxylate aminotransferase 2 homolog 1, mitochondrial
Nt16g00851.1	Nt16:29535029..29536033	Protein pleiotropic regulatory locus 1
Nt16g00852.1	Nt16:29537221..29539965	Putative late blight resistance protein homolog R1B-12
Nt16g00853.1	Nt16:29584716..29585210	Brassin teroid-responsive RING protein 1
Nt16g00854.1	Nt16:29788321..29791544	Apoptotic chromatin condensation inducer in the nucleus
Nt16g00855.1	Nt16:29835969..29846339	Regulation of nuclear pre-mRNA domain-containing protein 1B
Nt16g00856.1	Nt16:29849491..29856126	Short-chain dehydrogenase RED1
Nt16g00859.1	Nt16:29997148..30011354	Protein CELLUL E SYNTHASE INTERACTIVE 1
Nt16g00860.1	Nt16:30049818..30056824	Aspartic proteinase-like protein 1
Nt16g00861.1	Nt16:30102811..30103406	Heavy metal-associated isoprenylated plant protein 23
Nt16g00862.1	Nt16:30125617..30128718	Phot ynthetic NDH subunit of lumenal location 4, chloroplastic
Nt16g00863.1	Nt16:30352417..30354651	L-ascorbate oxidase
Nt16g00864.1	Nt16:30380089..30406947	General transcription factor IIH subunit 2
Nt16g00868.1	Nt16:30510796..30512013	Protein NEN4
Nt16g00869.1	Nt16:30513160..30525990	Sulfate transporter 2.1
Nt16g00870.1	Nt16:30625793..30626299	Chaperone protein dnaJ 20, chloroplastic
Nt16g00871.1	Nt16:30716127..30719196	In itol-3-ph phate synthase
Nt16g00872.1	Nt16:30720799..30721098	Putative late blight resistance protein homolog R1A-3
Nt16g00873.1	Nt16:30722633..30730784	FCS-Like Zinc finger 5
Nt16g00877.1	Nt16:30930488..30933947	Protein S EKI 2
Nt16g00879.1	Nt16:31037640..31039339	Pollen-specific protein C13
Nt16g00880.1	Nt16:31041616..31054303	Type I in itol polyph phate 5-ph phatase 5
Nt16g00881.1	Nt16:31054763..31056304	Putative ETHYLENE INSENSITIVE 3-like 4 protein
Nt16g00884.1	Nt16:31191056..31197498	Protein ROLLING AND ERECT LEAF 2
Nt16g00885.1	Nt16:31198596..31203813	Acyl-coenzyme A oxidase 2, peroxisomal
Nt16g00887.1	Nt16:31357946..31359031	Ethylene-responsive transcription factor RAP2-4
Nt16g00897.1	Nt16:31642278..31644587	Probable trehal e-ph phate ph phatase J
Nt16g00901.1	Nt16:31876630..31877976	Tropinone reductase homolog
Nt16g00902.1	Nt16:32064044..32064847	NDR1/HIN1-like protein 13
Nt16g00903.1	Nt16:32131136..32131952	PLAT domain-containing protein 1
Nt16g00905.1	Nt16:32193818..32194315	PLAT domain-containing protein 1
Nt16g00906.1	Nt16:32229007..32231593	Inactive TPR repeat-containing thioredoxin TTL3
Nt16g00907.1	Nt16:32235521..32238928	Protein SCO1 homolog 2, mitochondrial
Nt16g00908.1	Nt16:32273308..32276038	Succinate dehydrogenase [ubiquinone] iron-sulfur subunit 3, mitochondrial
Nt16g00913.1	Nt16:32556961..32566200	Tetratricopeptide repeat protein 1
Nt16g00914.1	Nt16:32613000..32630186	ABC transporter D family member 1
Nt16g00920.1	Nt16:32719874..32723468	DNA oxidative demethylase ALKBH2
Nt16g00921.1	Nt16:32724415..32727281	Annexin D2
Nt16g00922.1	Nt16:32738288..32744022	Oxidation resistance protein 1
Nt16g00923.1	Nt16:32802601..32817899	Asparagine synthetase [glutamine-hydrolyzing] 3
Nt16g00926.1	Nt16:32926444..32930560	BTB/POZ domain-containing protein DOT3
Nt16g00930.1	Nt16:33127222..33132779	Probable mitochondrial adenine nucleotide transporter BTL3
Nt16g00931.1	Nt16:33170085..33183265	Calmodulin-binding transcription activator 3
Nt16g00932.1	Nt16:33237213..33248400	Cyclin-dependent kinase C-1
Nt16g00933.1	Nt16:33249450..33258914	Ubiquitin carboxyl-terminal hydrolase 3
Nt16g00935.1	Nt16:33469556..33470870	Transcription factor MYB92
Nt16g00938.1	Nt16:33699127..33700260	Protein SENSITIVE TO PROTON RHIZOTOXICITY 1
Nt16g00939.1	Nt16:33751328..33751852	Putative gamma-glutamylcyclotransferase At3g02910
Nt16g00940.1	Nt16:33825710..33827751	Tyr ine-protein ph phatase DSP3
Nt16g00943.1	Nt16:34053898..34054218	Protein METHYLENE BLUE SENSITIVITY 1
Nt16g00944.1	Nt16:34127939..34135574	WRKY transcription factor SUSIBA2
Nt16g00945.1	Nt16:34205627..34210642	Pentatricopeptide repeat-containing protein At4g18975, chloroplastic
Nt16g00946.1	Nt16:34338956..34353626	Basic leucine zipper and W2 domain-containing protein 2
Nt16g00948.1	Nt16:34495911..34496189	Putative small ubiquitin-related modifier 8
Nt16g00951.1	Nt16:34522897..34534117	Riboflavin bi ynthesis protein PYRR, chloroplastic
Nt16g00952.1	Nt16:34665710..34669353	Probable protein ph phatase 2C 33
Nt16g00959.1	Nt16:34753895..34763328	Aspartic proteinase 36
Nt16g00965.1	Nt16:34894070..34897373	Auxin efflux carrier component 5
Nt16g00968.1	Nt16:35217135..35224559	CBS domain-containing protein CBSX6
Nt16g00970.1	Nt16:35329092..35331368	Receptor-like protein CLAVATA2
Nt16g00971.1	Nt16:35332525..35348034	Protein TRIGALACT YLDIACYLGLYCEROL 3, chloroplastic
Nt16g00972.1	Nt16:35407103..35408756	Premnaspirodiene oxygenase
Nt16g00974.1	Nt16:35535964..35537257	Uncharacterized tRNA/rRNA methyltransferase YsgA
Nt16g00977.1	Nt16:35661325..35671551	Rhamnogalacturonate lyase
Nt16g00978.1	Nt16:35718891..35724091	F-box/FBD/LRR-repeat protein At1g13570
Nt16g00979.1	Nt16:35754409..35755635	PHD finger protein MALE MEIOCYTE DEATH 1
Nt16g00980.1	Nt16:35802256..35806964	Putative pentatricopeptide repeat-containing protein At1g09680
Nt16g00982.1	Nt16:35972376..35974521	Pentatricopeptide repeat-containing protein At5g01110
Nt16g00984.1	Nt16:36290095..36292248	Pentatricopeptide repeat-containing protein At5g01110
Nt16g00986.1	Nt16:36339053..36340770	Zinc finger CCHC domain-containing protein 10
Nt16g00988.1	Nt16:36392725..36402104	Cytochrome P450 CYP736A12
Nt16g00998.1	Nt16:36652505..36653579	CASP-like protein 4D1
Nt16g00999.1	Nt16:36876598..36877644	Probable UDP-arabinopyran e mutase 5
Nt16g01000.1	Nt16:36927091..36964721	Protein LUTEIN DEFICIENT 5, chloroplastic
Nt16g01001.1	Nt16:36967942..36984478	Sterol 3-beta-gluc yltransferase UGT80A2
Nt16g01005.1	Nt16:37138771..37139635	Serine/threonine-protein ph phatase 7 long form homolog
Nt16g01006.1	Nt16:37157275..37173676	Protein CHROMATIN REMODELING 4
Nt16g01007.1	Nt16:37177041..37180130	Probable serine/threonine-protein kinase PBL26
Nt16g01009.1	Nt16:37257188..37260154	F-box protein At2g02240
Nt16g01012.1	Nt16:37339857..37350540	Cysteine-rich receptor-like protein kinase 42
Nt16g01013.1	Nt16:37352137..37354483	Probable serine/threonine-protein kinase PBL28
Nt16g01014.1	Nt16:37448744..37451968	Violaxanthin de-epoxidase, chloroplastic
Nt16g01021.1	Nt16:37566418..37575404	Trigger factor
Nt16g01022.1	Nt16:37685652..37697144	Histone deacetylase 14
Nt16g01024.1	Nt16:37798376..37801175	U-box domain-containing protein 9
Nt16g01027.1	Nt16:37920051..37924333	U11/U12 small nuclear ribonucleoprotein 48 kDa protein
Nt16g01031.1	Nt16:38005782..38006366	Dehydration-responsive element-binding protein 2G
Nt16g01034.1	Nt16:38238766..38241892	Protein MAIN-LIKE 1
Nt16g01035.1	Nt16:38249615..38252469	GDSL esterase/lipase LTL1
Nt16g01039.1	Nt16:38595747..38599263	Cycloartenol Synthase
Nt16g01043.1	Nt16:38820298..38821557	GDSL esterase/lipase At4g28780
Nt16g01044.1	Nt16:38831835..38835577	Probable nucleolar protein 5-1
Nt16g01050.1	Nt16:38956767..38980408	Pentatricopeptide repeat-containing protein At2g17140
Nt16g01051.1	Nt16:39026175..39062235	Protein ILITYHIA
Nt16g01057.1	Nt16:39133658..39138103	Ex ome complex component CSL4
Nt16g01058.1	Nt16:39166098..39169695	Microfibrillar-associated protein 1
Nt16g01063.1	Nt16:39345771..39348570	Ammonium transporter 1 member 2
Nt16g01066.1	Nt16:39407100..39408425	Protein CANDIDATE G-PROTEIN COUPLED RECEPTOR 7
Nt16g01067.1	Nt16:39457964..39468508	Vacuolar protein sorting-associated protein 26A
Nt16g01069.1	Nt16:39624763..39625023	Ribul e bisph phate carboxylase large chain (Fragment)
Nt16g01070.1	Nt16:39762648..39762899	Hydroquinone gluc yltransferase
Nt16g01071.1	Nt16:39763885..39773888	Bifunctional TH2 protein, mitochondrial
