# Supplementary material for: Construction of a high-density genetic map and dissection of genetic architecture of six agronomic traits in tobacco (Nicotiana tabacum L.)
Source: Front Plant Sci. 2023 Feb 15;14:1126529. doi: 10.3389/fpls.2023.1126529 (PMC9975568; doi:10.3389/fpls.2023.1126529)
Supplement: Supplementary file 3 [file DataSheet_2.xlsx]

## Sheet: Sheet1
Env	Variety	nPH	nLN	SG	IL	LL	LW
2018_SL	Y1.1	164.33	23.33	9	4.75	54.6	29.22
2018_SL	Y10.1	189	28.67	9.32	4.5	66.92	30.67
2018_SL	Y100.1	217.33	34	12.07	3.78	73.33	31.75
2018_SL	Y101.1	240	31.83	11.33	4.25	76.33	36
2018_SL	Y103.1	181.67	21.33	10.32	4.83	78.67	37.83
2018_SL	Y106.1	200	29	10.75	4.17	74.5	41.5
2018_SL	Y107.1	183	26.33	10.17	4.33	63	36
2018_SL	Y110.1	183.33	20.33	8.33	3.95	70.83	35.33
2018_SL	Y111.1	166.67	20	8.63	3.92	72.5	31.52
2018_SL	Y112.1	173.33	24	10.08	4.33	64.67	31
2018_SL	Y113.1	180.67	26	9.17	4.17	68.83	38.08
2018_SL	Y115.1	242.83	33.33	11.17	4.67	70	36.83
2018_SL	Y118.1	182.67	29	9.98	4.17	77.33	34.17
2018_SL	Y119.1	195	27	10.33	4	68	35.25
2018_SL	Y12.1	159	23	8.4	4.33	73.67	27.33
2018_SL	Y121.1	186.67	28	10.5	4.17	79.08	37.17
2018_SL	Y123.1	222.67	25	9.85	5.92	64.2	35.17
2018_SL	Y124.1	246.83	39.33	10.33	4.15	66.67	29.33
2018_SL	Y125.1	180	25	9.43	5.33	76.53	29.67
2018_SL	Y127.1	239.67	36.83	11	3.93	75.83	32.33
2018_SL	Y128.1	236.67	39	11.75	4.5	76.83	35.42
2018_SL	Y129.1	205	27.33	11.17	6.67	78.33	40.08
2018_SL	Y13.1	195	24.33	9.27	4.83	72.5	37.8
2018_SL	Y132.1	215	28	9.73	6.42	82.5	37.55
2018_SL	Y133.1	201.67	28.67	10.03	6.17	70.43	39.37
2018_SL	Y134.1	.	.	10.18	5.08	83.73	33.57
2018_SL	Y136.1	170	25.67	10.92	4.67	77.33	34.33
2018_SL	Y138.1	185	28.33	9.9	5.75	73.67	38.67
2018_SL	Y14.1	187.33	23.33	8.1	4.33	70	30.85
2018_SL	Y142.1	196.67	25.67	9.93	6.33	72.77	40.9
2018_SL	Y143.1	213.33	27.33	11.08	5	76.9	30.67
2018_SL	Y144.1	186	24.33	9.68	4.92	80.17	34.17
2018_SL	Y145.1	190	25.67	8.55	6.17	75	35.27
2018_SL	Y146.1	176.67	24.33	7.83	5	71.83	34.13
2018_SL	Y147.1	182.67	26.33	9.33	4.58	75	30.37
2018_SL	Y149.1	210	26	9.5	5.67	73.83	35.1
2018_SL	Y150.1	200	26	9.03	5.22	68.33	33.6
2018_SL	Y151.1	206.67	23.67	8.23	5.67	60.83	31.72
2018_SL	Y153.1	200	25	8.5	4.67	66	35.27
2018_SL	Y159.1	206.67	27.67	9.6	5.42	75.2	33.83
2018_SL	Y16.1	201.17	30.5	9.8	5	77.83	33
2018_SL	Y161.1	173.33	25	8.65	5.48	84.67	45.27
2018_SL	Y162.1	216.67	25.67	8.7	4.77	78.57	32.33
2018_SL	Y163.1	216	34.33	11.23	4.17	79	32.17
2018_SL	Y164.1	253.33	29.33	9.87	6.85	72.87	40.42
2018_SL	Y17.1	168	25.67	7.77	4.5	61.8	30.67
2018_SL	Y18.1	196.67	22	8.73	4.83	74.67	32.48
2018_SL	Y19.1	184.33	24.33	8.87	4.67	74.33	34.18
2018_SL	Y194.5	203.33	28	10.77	5.53	82.17	34.57
2018_SL	Y195.1	.	.	9.63	5.62	77	34.83
2018_SL	Y196.1	.	.	9.4	5.33	81.6	34.73
2018_SL	Y197.1	183.33	22.33	9.1	5.5	83.5	37.33
2018_SL	Y198.1	210	23.33	8.63	5	81.17	36.5
2018_SL	Y199.1	200	23.67	8.73	5.17	72.33	34.77
2018_SL	Y2.1	215.67	36	11.07	4.83	73.06	36.44
2018_SL	Y200.1	196.67	24	8.23	5.42	69.67	38.67
2018_SL	Y202.5	199.33	21	8.47	5	76.4	30.63
2018_SL	Y204.1	210	30.33	9.57	5.85	67.5	35.25
2018_SL	Y205.1	185.67	25.33	9.27	4.75	73.67	32.33
2018_SL	Y206.1	216.67	24	8.7	5.58	69.83	37.95
2018_SL	Y207.1	186.67	22.33	9.2	5.2	78.58	33.98
2018_SL	Y208.1	196.67	22.33	7.73	4.68	67	30.43
2018_SL	Y209.5	156.67	20.67	7.2	5.75	65.67	27.13
2018_SL	Y210.1	170	23.67	7.25	5	62.17	23.83
2018_SL	Y211.1	163.33	21.67	7.6	5.17	67.17	29.17
2018_SL	Y212.1	133.33	22.33	7.63	4.67	56.73	27.48
2018_SL	Y213.1	163.33	23	8.03	4.42	66.67	30.5
2018_SL	Y214.1	166.67	21	8.12	4.75	69.7	30.17
2018_SL	Y215.1	170	23	8.47	4.95	70.17	32.33
2018_SL	Y217.1	156.67	21.33	8.3	4.23	65.67	31.83
2018_SL	Y218.1	170	23	7.97	4.67	68.5	31.38
2018_SL	Y219.1	180	24.33	8.67	5.7	60.67	34.83
2018_SL	Y22.1	156.17	21.5	8.47	4.5	75.5	34.87
2018_SL	Y221.1	163.33	23.67	7.63	5.38	64.38	28.38
2018_SL	Y222.1	176.67	22	7.65	4.95	66.37	30.75
2018_SL	Y223.1	180	23.33	8.12	5.5	66.5	33.67
2018_SL	Y224.1	156.67	26.67	8.68	4.63	70	30.83
2018_SL	Y226.1	152.67	26.33	8.4	4.55	64.17	23.83
2018_SL	Y227.1	160	25.67	8.25	5.15	70	29
2018_SL	Y228.1	149.33	23.33	8.75	4.25	68.17	28.45
2018_SL	Y23.1	178.67	23.67	8.77	4.67	69.17	33.73
2018_SL	Y230.1	182	18.67	9.62	4.83	71.92	32.17
2018_SL	Y232.1	156.67	24.33	9.33	3.67	71.33	36.5
2018_SL	Y233.1	186.67	25	8.17	4.83	63.5	30.67
2018_SL	Y234.1	192.33	23.33	8.83	4.67	60	31.83
2018_SL	Y235.1	202.67	22.33	8.33	5.67	60.33	32
2018_SL	Y236.1	201.67	26.67	9.17	5.67	61	34.33
2018_SL	Y237.1	176.67	22.33	9.17	4.83	66.67	31.17
2018_SL	Y238.1	221.33	23.33	8.67	4.33	67	34
2018_SL	Y239.1	183.67	22.33	8.5	4.67	58.83	32.33
2018_SL	Y24.1	237.17	32.67	10.22	4.67	69.58	31
2018_SL	Y240.1	169	23.67	8.5	3.67	70	31.83
2018_SL	Y241.1	193.33	27.33	9.33	4.17	70.33	31.83
2018_SL	Y242.1	212.33	24.67	9.33	4.17	62	38.17
2018_SL	Y244.1	170	22.33	7.67	3.5	60.17	31
2018_SL	Y245.1	186.67	25.33	9.5	3.33	61.33	33
2018_SL	Y246.1	178.67	30.33	9.17	5.67	66.52	33.42
2018_SL	Y247.1	196.67	24	8.17	4.17	66.17	32.5
2018_SL	Y248.1	169.33	21.67	8.5	4	60.33	31.17
2018_SL	Y25.1	168	23.33	9.55	4.33	71.33	32.4
2018_SL	Y250.1	183.33	21	8.33	3.93	66.5	30
2018_SL	Y251.1	211	27.33	8.5	4.03	53	28
2018_SL	Y252.2	204	25.67	8.67	4.67	55.33	33
2018_SL	Y253.1	203.33	25.33	8.67	4	59.33	30.5
2018_SL	Y254.1	170	22	9.67	3.93	66.5	33.67
2018_SL	Y255.1	172.67	29.33	9.67	4.67	69.45	29.08
2018_SL	Y257.1	187	23.33	9	5.83	67.6	29.08
2018_SL	Y26.1	167.33	28	9.5	4.33	66.8	32.32
2018_SL	Y260.1	184.67	26.67	9.17	5.08	64.92	29.83
2018_SL	Y262.1	201.33	23	8.83	5.33	71.28	29.58
2018_SL	Y263.1	177	26	8.83	4.5	60.67	30.67
2018_SL	Y264.1	185.67	24.33	8.5	5.67	66.33	31.75
2018_SL	Y265.1	179.33	34	9.5	5.83	62.58	30.25
2018_SL	Y266.1	209.67	30.67	8.5	5.58	67.17	29.08
2018_SL	Y267.2	162.67	30	10.08	5.08	68.83	29.25
2018_SL	Y268.1	186	26	9.5	5.33	72.2	32.5
2018_SL	Y271.1	186.33	31.33	9.25	4.83	68.23	30.42
2018_SL	Y272.1	187.33	23.33	8.75	5.17	67.65	31.67
2018_SL	Y273.1	188.67	22.67	8.58	5	61.82	30.53
2018_SL	Y274.1	174.33	23.67	8.83	5	65.03	27.9
2018_SL	Y275.1	200.67	24.67	8.33	5.33	60.5	26.92
2018_SL	Y276.1	221.67	22.67	8.83	5.08	63.83	28.48
2018_SL	Y277.1	176	24.67	9.08	5.83	70.67	30.7
2018_SL	Y278.1	.	.	10.08	5.58	63.3	30
2018_SL	Y279.1	161.67	25.33	9.33	5.33	74	31.4
2018_SL	Y281.1	156.67	32	10.25	5.5	65.62	28.27
2018_SL	Y284.1	176	23	8.92	4.75	71.85	29.13
2018_SL	Y285.1	143.67	23.33	7	3.33	48.62	22.08
2018_SL	Y287.1	215	36.5	10.53	3.93	67.5	32.67
2018_SL	Y288.1	184	24	9.5	5.5	70.62	32.4
2018_SL	Y289.1	167.33	35.33	10.25	4.67	68.67	29.67
2018_SL	Y29.1	184.67	23.33	10.42	6.83	76.87	38.17
2018_SL	Y290.1	201.67	32.33	10.17	5.33	65.92	32.83
2018_SL	Y291.1	166	25	9.67	4.83	75.4	35.67
2018_SL	Y292.1	140	23	8.17	4.3	60.2	26.68
2018_SL	Y293.1	132.33	27.67	8.08	4.42	59.7	27.97
2018_SL	Y294.1	126	31.33	9.83	3.25	63.45	25.67
2018_SL	Y296.1	166.67	23.67	8.83	4.83	66.08	28.58
2018_SL	Y299.1	167	30.67	9.5	5	64.87	30.7
2018_SL	Y3.1	194.33	30.67	9.42	4.67	76.42	28.17
2018_SL	Y30.1	181.33	23	9.5	4.67	70.83	27.58
2018_SL	Y300.1	179	34.33	8.52	3.58	64.03	26.82
2018_SL	Y303.1	178	23.67	8.67	4.67	65.23	28.05
2018_SL	Y305.1	142	22.33	7.83	4.67	53.58	27.48
2018_SL	Y306.1	190.33	31.67	8.65	4.33	59	28.1
2018_SL	Y307.1	158.67	22.67	8	4.58	63.65	25.12
2018_SL	Y308.1	187	24	9.08	5.25	65.17	27.47
2018_SL	Y309.1	172.33	25.67	9	3.67	62.38	30.53
2018_SL	Y31.1	160.67	20.5	9.33	5.5	71.87	29.63
2018_SL	Y310.1	176.67	31	9.17	5.33	63.92	27.12
2018_SL	Y311.1	146.33	26.67	9.33	5.17	56.63	30.62
2018_SL	Y313.1	164.33	28.33	8	4.42	63.25	24.45
2018_SL	Y315.1	177.67	33	10.17	5.17	59.68	33.13
2018_SL	Y316.1	147.33	28	8.83	4.22	59.65	31.27
2018_SL	Y317.1	.	.	8.75	4.5	62.9	28.67
2018_SL	Y318.1	221.33	28.67	9.17	5.5	56.92	32.58
2018_SL	Y319.1	179.33	29.33	9.33	5.67	70.83	29.33
2018_SL	Y32.1	165	23	9.1	4.83	71.5	26.57
2018_SL	Y320.1	149.33	24.33	7.67	4.17	58.67	23.58
2018_SL	Y321.1	203.33	28.33	9.67	4.67	58.3	31.37
2018_SL	Y322.1	169.67	32	8.75	4.83	64.95	24.78
2018_SL	Y326.1	149.33	31	9	4.33	60.48	25.08
2018_SL	Y327.1	163	24.33	8.83	5.17	67.98	28.95
2018_SL	Y328.1	155.67	27.33	8.58	4.5	59.85	26.28
2018_SL	Y329.1	168.33	24	8.83	5.33	63.12	26.92
2018_SL	Y33.1	178.33	30.83	9.88	4.5	66.33	29.75
2018_SL	Y330.1	161.33	29.33	9.33	5	65.53	25.37
2018_SL	Y331.1	185.67	24.67	9	5.5	64.4	30.83
2018_SL	Y333.1	180.67	26	8.75	6.17	70.23	31.2
2018_SL	Y335.1	203.33	27	9.17	6	63.92	33.75
2018_SL	Y338.1	180	23.33	8.42	5.17	66.23	28.03
2018_SL	Y34.1	153	26.67	9.38	4.5	65.17	31.38
2018_SL	Y340.1	147	29.33	9	5.17	64.6	24.73
2018_SL	Y341.1	135	24.33	8.5	4.5	56.98	21.6
2018_SL	Y343.1	133.67	26.67	9.17	4.33	65.73	26.33
2018_SL	Y344.1	131.67	29.67	7.92	4	59.18	23.2
2018_SL	Y345.1	198.67	23.67	8.5	5.5	74.17	32.08
2018_SL	Y349.1	175.33	30.67	9.33	4.67	63.42	31.17
2018_SL	Y35.1	156.33	21.33	8.83	6	63.08	28.15
2018_SL	Y355.1	188	22.67	8.67	5.17	72.5	30.87
2018_SL	Y356.1	163	26.33	9.75	5.42	66.25	28.37
2018_SL	Y357.1	168.67	28.67	9.33	6	67.42	34.08
2018_SL	Y359.2	174	23.67	8	5.33	61	26.75
2018_SL	Y36.1	165	22	8.8	4.67	66.33	31.9
2018_SL	Y360.1	164	30.67	9.33	5.33	62.27	27.92
2018_SL	Y361.1	175.33	24.67	8.5	5.5	62.6	22.7
2018_SL	Y363.1	120	22	8.58	5.17	65.12	27.28
2018_SL	Y366.5	153.67	27.33	8.5	4.67	61.17	23.65
2018_SL	Y367.1	146.67	28.33	8.5	4.83	64.75	25.3
2018_SL	Y368.1	147	25.67	8.33	4.83	60.57	26.17
2018_SL	Y37.1	176.67	25	8.82	4.83	58.67	34.25
2018_SL	Y370.1	190.67	24	8.42	5.17	73.37	22.2
2018_SL	Y372.5	212.33	23	8.67	6.17	72.03	27
2018_SL	Y373.2	164.67	30	9	5.67	68.08	29.58
2018_SL	Y374.1	215	33.33	11.5	4.5	63.5	29.08
2018_SL	Y376.1	215.67	26.67	10.58	5.5	73.17	33.47
2018_SL	Y378.1	142.67	29	10	4.67	74.75	29.92
2018_SL	Y38.1	.	.	10.23	4	70.5	32.83
2018_SL	Y380.1	223.33	28	10.6	4.33	67.5	33
2018_SL	Y382.1	201.33	25.33	10.17	5.5	78.08	34.25
2018_SL	Y383.1	250.17	35.17	10.58	5.17	68.83	33.75
2018_SL	Y384.5	198	28.67	9.67	4.5	69.35	34.7
2018_SL	Y386.1	207	25.33	10.5	6.17	81.82	35.08
2018_SL	Y387.1	212.17	34.33	11.7	3.83	75	31.5
2018_SL	Y388.5	130	28.67	10.17	3.67	67.1	29.4
2018_SL	Y389.1	189.33	21.67	8.83	6.17	70.15	30.58
2018_SL	Y39.1	.	.	9.17	3.92	69.63	29.18
2018_SL	Y40.1	.	.	8	4.67	69.83	28.73
2018_SL	Y41.1	148.33	20	7.62	5	72	28
2018_SL	Y42.1	163.33	21.33	8.63	4.5	73.67	29.83
2018_SL	Y44.1	164.67	20.17	9.58	4.92	78.8	33.85
2018_SL	Y46.1	203.83	32.5	10.83	4.67	64.92	35.25
2018_SL	Y48.1	176	21	8.3	5.5	69.33	31.67
2018_SL	Y49.1	149.33	23	9.33	6	68.6	32.33
2018_SL	Y5.1	170.67	24.67	8.58	4.42	60.9	31.58
2018_SL	Y51.1	166.33	28.33	8.57	4.67	68.17	28.75
2018_SL	Y53.1	191.17	29.5	10.45	4.67	62.83	31.5
2018_SL	Y55.1	178	21.33	8.78	4.5	70.67	32
2018_SL	Y56.1	160	23.33	9.33	4.17	71.67	36.45
2018_SL	Y57.1	157.83	22.83	9.42	6	77.53	35.5
2018_SL	Y58.1	211	24.33	9.87	4.83	66.5	38.38
2018_SL	Y59.1	178.33	23.5	11	7.17	77.78	34.25
2018_SL	Y6.1	191.67	22.67	8.88	4.5	69.93	37.1
2018_SL	Y60.1	166.83	22.67	10.42	6.67	70.62	35
2018_SL	Y61.1	185.33	24.5	11.08	6	71.47	39.48
2018_SL	Y63.1	184.83	25	10.42	4.83	82.18	36.08
2018_SL	Y64.1	195.83	31.33	12.22	2.67	92.33	37.78
2018_SL	Y65.1	176.33	25	11.17	5.5	83.17	34
2018_SL	Y66.1	208	23.67	10.08	4.67	73.33	38.48
2018_SL	Y67.2	245.83	40.17	12.13	4.33	72	36.75
2018_SL	Y68.1	177.83	25	10.67	5.5	79.43	37.58
2018_SL	Y7.1	172.33	28.67	8.85	4.5	68.7	34.35
2018_SL	Y70.5	183	24.67	9.88	4.33	73.67	38.42
2018_SL	Y71.1	191.33	25	9.75	4.17	80.75	37.67
2018_SL	Y72.1	218.33	26	9.75	4.67	70.83	41.33
2018_SL	Y73.1	159.67	24.5	10.58	5.5	76.45	36.17
2018_SL	Y74.1	198	24.67	9.67	4	79.5	33.88
2018_SL	Y75.2	189.33	25.33	9.42	4.33	68.5	38.17
2018_SL	Y78.1	171	20.67	8.17	4.67	72.58	28.5
2018_SL	Y8.1	194.33	28	9.57	4.5	74.23	33.12
2018_SL	Y81.1	170.67	28	9.55	4.67	68.08	36.5
2018_SL	Y83.1	164.83	33.33	10.72	3.85	71.83	30.08
2018_SL	Y86.1	233.33	21.67	8.55	6.5	63.58	31.58
2018_SL	Y88.1	168.33	28.67	8.08	4.5	62.5	32.08
2018_SL	Y89.1	175.67	23	8.18	4.5	72.42	33
2018_SL	Y9.1	238	33.67	10.2	4	68.83	31.12
2018_SL	Y91.1	167.5	33.83	10.92	3.17	68.33	28.83
2018_SL	Y92.1	223.33	27.33	11	4.33	82.1	36.25
2018_SL	Y93.1	221.67	25	10.15	4.5	71.33	41.08
2018_SL	Y94.1	196	23.33	10.25	5	69.58	32.33
2018_SL	Y96.1	186.33	22	10.03	4	78.83	35.33
2018_SL	Y97.1	186	22.67	10.5	4.15	71	35.75
2018_SL	Y98.1	.	.	10.08	4.1	73.83	36.75
2018_SL	Y99.1	201.33	29.67	11.97	3.97	74.73	34.02
2019_SL	Y1.1	123.167	23.6667	8.1	4.025	51.125	24.75
2019_SL	Y10.1	138.333	24.3333	8.075	4.3	57.15	25.925
2019_SL	Y100.1	189	33.6667	10.4	4.3575	64.075	25.525
2019_SL	Y101.1	166	30.3333	8.75	4.7125	64.3	30.475
2019_SL	Y103.1	128.633	28.3333	8.05	4.315	59.2	25.225
2019_SL	Y106.1	201.667	28	9	5.2575	63.175	33.675
2019_SL	Y107.1	165	29.3333	8.225	4.95	54.95	31.1
2019_SL	Y110.1	147.3	27	8.425	5.525	64.55	29.2
2019_SL	Y111.1	128	28	8	4.645	62.775	25.35
2019_SL	Y112.1	136.667	28.6667	8.2	4.59	60.075	27.675
2019_SL	Y113.1	173.667	27.3333	8.275	5.1325	60	28.275
2019_SL	Y115.1	203.333	32.6667	9.275	5.0725	54.55	25.15
2019_SL	Y118.1	190.333	34.3333	10	4.035	65.95	23.525
2019_SL	Y119.1	176.667	31.3333	9.55	4.285	60.875	30.4
2019_SL	Y12.1	88	20.3333	6.825	2.975	54.5	20.4
2019_SL	Y121.1	195	29.6667	9.25	4.54	65.25	24.725
2019_SL	Y123.1	181.333	29	8.575	4.8375	62.625	29.7
2019_SL	Y124.1	225.333	38.6667	10.7	4.6375	61.625	27.675
2019_SL	Y125.1	187.333	31.6667	9.025	4.0625	66.7	24.275
2019_SL	Y127.1	217.667	34	8.925	4.3475	66.575	26.8
2019_SL	Y128.1	199.667	37.3333	9.85	4.5025	64.775	30.2
2019_SL	Y129.1	209	31.6667	10.025	4.7575	60.65	33.425
2019_SL	Y13.1	151	29	6.975	4.375	58.3	25.475
2019_SL	Y132.1	131.733	26.6667	8.025	4.15	58.9	25.775
2019_SL	Y133.1	156.333	27.3333	7.125	4.275	52.5	28.3
2019_SL	Y134.1	148.333	29.6667	6.7	3.4625	57.175	24.875
2019_SL	Y136.1	153.667	33.6667	8.65	3.8325	57.625	23
2019_SL	Y138.1	122.167	28	7.95	4.05	53.35	27.475
2019_SL	Y14.1	141.667	25	7.025	5.195	57.7	24.575
2019_SL	Y142.1	135	23.6667	7.675	4.9775	53.425	30.95
2019_SL	Y143.1	135	31.6667	7.325	3.6375	59.15	25.35
2019_SL	Y144.1	123	27.6667	7.575	4.1625	56.275	26.175
2019_SL	Y145.1	132.233	25.6667	7.5375	5.0625	54.3	26.675
2019_SL	Y146.1	123.067	23	6.475	5.395	57.6	23.15
2019_SL	Y147.1	160.333	31.6667	9.85	3.83	64.375	24.575
2019_SL	Y149.1	146	27.3333	8.25	4.8875	57.375	27.525
2019_SL	Y150.1	105.667	26.3333	6.875	4.075	53.55	26.125
2019_SL	Y151.1	118.333	26	6	4.775	42.575	23.9
2019_SL	Y153.1	131	27	6.975	4.7175	44.575	24.35
2019_SL	Y159.1	135	27.3333	8.275	3.9125	49.125	19.925
2019_SL	Y16.1	197.667	34	9.475	5.5075	71.925	30.35
2019_SL	Y161.1	116.333	23	6.05	4.3875	46.35	20.1
2019_SL	Y162.1	120.333	28	6.675	3.68	37.4	16.875
2019_SL	Y163.1	144.333	31.6667	8.5	4.475	51.725	25.05
2019_SL	Y164.1	155	28.6667	8.375	4.8625	51.2	28.275
2019_SL	Y17.1	163.667	26	7.525	4.975	52	24.75
2019_SL	Y18.1	118.333	21.3333	7.7	4.425	58.475	27.325
2019_SL	Y19.1	120.667	25.3333	7.8	4.3	53.9	27.4
2019_SL	Y194.5	171	29.6667	8.55	4.3	65.125	27.25
2019_SL	Y195.1	132	26.6667	7.75	3.8375	55.675	26.475
2019_SL	Y196.1	108.667	21.3333	6.775	3.8625	60.05	22.125
2019_SL	Y197.1	105.667	23.6667	6.475	3.525	54.225	19.075
2019_SL	Y198.1	120	27	6.25	3.85	58.225	20.775
2019_SL	Y199.1	115	26.6667	7	3.8	50.75	19.725
2019_SL	Y2.1	182.333	34.3333	10.275	4.59	61.85	29.05
2019_SL	Y200.1	128.667	24.6667	6.775	4.65	58.275	30.775
2019_SL	Y202.5	116	26.6667	6.875	3.5975	46.15	16.825
2019_SL	Y204.1	119.333	28	7	3.7875	52.8	23.6
2019_SL	Y205.1	197	27.6667	9.125	5.095	55.3	22.625
2019_SL	Y206.1	136.333	27	6.9	4.3875	53.05	23.275
2019_SL	Y207.1	106.667	25.3333	6.025	3.9625	40.075	13.775
2019_SL	Y208.1	106	24.6667	6.55	3.9875	51.825	20.05
2019_SL	Y209.5	107	27	6.325	4.475	42.875	16.375
2019_SL	Y210.1	106	26.3333	7.05	3.975	54.5	22
2019_SL	Y211.1	99	25.3333	6.725	3.65	50.2333	19.4
2019_SL	Y212.1	95.6667	27.3333	6.075	3.425	49.075	25.125
2019_SL	Y213.1	129.667	28.6667	5.925	3.85	55.075	23.65
2019_SL	Y214.1	125.667	22.6667	6.3	4.22	55.45	20.575
2019_SL	Y215.1	90.6667	24	5.7	3.1	41.8	19.375
2019_SL	Y217.1	121.333	24	6.325	4.05	51.95	22.3
2019_SL	Y218.1	104.667	25	6.3	3.475	48.9	20.65
2019_SL	Y219.1	180.333	26.3333	9.525	5.8425	52.025	24.225
2019_SL	Y22.1	113.667	25.3333	6.425	4.325	51.4	24.375
2019_SL	Y221.1	136.333	26.6667	9.55	4.6975	56.075	23.675
2019_SL	Y222.1	104.333	27.3333	5.8	3.65	51.375	23.125
2019_SL	Y223.1	140.333	30.3333	8.525	4.69	60.5	25.6
2019_SL	Y224.1	155.333	31.3333	9.275	5.3025	62.3	24.075
2019_SL	Y226.1	147	37	7.3	4.3425	49.825	15.9
2019_SL	Y227.1	127.667	28.3333	7.05	4.1125	58.675	24.3
2019_SL	Y228.1	99.3333	27.3333	6.825	3	49.475	21.05
2019_SL	Y23.1	129.667	22.3333	7.975	4.2625	55.175	27.6
2019_SL	Y230.1	146.333	31	7.025	3.775	46.75	15.25
2019_SL	Y232.1	175.333	40	10	3.6375	71.225	21.1
2019_SL	Y233.1	107.667	27	7.2	3.36	50.15	19.75
2019_SL	Y234.1	122.333	24.3333	7.325	4.325	50.25	23.75
2019_SL	Y235.1	135	26.6667	7.25	4.61	48.875	21.825
2019_SL	Y236.1	149.333	29	7.65	4.6	50.75	27.125
2019_SL	Y237.1	99.6667	25	6.525	3.725	48.975	19.35
2019_SL	Y238.1	123.333	24.6667	7.05	4.5	52.375	25.125
2019_SL	Y239.1	125.333	24.6667	7.1	4.15	48.375	25.25
2019_SL	Y24.1	202.667	33.6667	9.8	4.695	61.225	27.475
2019_SL	Y240.1	105	27.6667	6.775	3.7	46.625	22.75
2019_SL	Y241.1	116.167	26.3333	7	3.7525	53.325	20.175
2019_SL	Y242.1	123	27.6667	6.975	3.775	49.25	25.25
2019_SL	Y244.1	93.3333	22.6667	6.425	3.9	50.75	21.5
2019_SL	Y245.1	125.667	30	7.2	4.1	49.25	23.5
2019_SL	Y246.1	106.667	27	6.5	4.2	54.25	23
2019_SL	Y247.1	115	27	6.625	4.075	49.75	25.5
2019_SL	Y248.1	100.167	26.3333	6.875	3.945	49.75	21.25
2019_SL	Y25.1	132.667	26.3333	7.075	4.155	64.025	29.25
2019_SL	Y250.1	111.667	23	6.75	4.21	57.4	23.525
2019_SL	Y251.1	136.333	27.3333	6.125	4.41	49.225	20.425
2019_SL	Y252.2	128.667	25	6.875	4.7075	50.5	25.175
2019_SL	Y253.1	144.5	28	7.175	4.8275	57.675	25.8
2019_SL	Y254.1	115.333	25.6667	6.875	3.76	53.1	21.375
2019_SL	Y255.1	173	32	9.55	4.4175	71.3	25.375
2019_SL	Y257.1	123	23.3333	6.55	4.2125	54.425	23.6
2019_SL	Y26.1	175.333	30	9.8	4.77	65.025	30.65
2019_SL	Y260.1	118.667	23.3333	6.775	4.225	58.725	22.575
2019_SL	Y262.1	129.333	24.6667	6.675	4.35	59.4	24.9
2019_SL	Y263.1	121.333	26	6.575	4.0375	53.225	22.575
2019_SL	Y264.1	127.333	27	6.9	4.8925	56.275	24.7
2019_SL	Y265.1	187.667	40	8.925	4.8075	59.4	25.975
2019_SL	Y266.1	126	24.3333	6.725	4.3675	51.6	22.25
2019_SL	Y267.2	145	36.6667	9.275	3.745	59.9	21.6
2019_SL	Y268.1	149.333	31.3333	8.075	3.9925	62.625	24.275
2019_SL	Y269.1	151.667	27	7.175	4.4375	60.875	23.5
2019_SL	Y271.1	140.333	26	8.725	3.95	61.375	34.475
2019_SL	Y272.1	139	27	7.425	3.9125	59	24.275
2019_SL	Y273.1	143.667	27.3333	7.525	4.045	54.025	22.75
2019_SL	Y274.1	119.667	25.6667	7.25	3.86	53.35	20.775
2019_SL	Y275.1	134.667	29.3333	7.225	4.1	56.85	24.25
2019_SL	Y276.1	111.667	26.3333	6.275	3.775	46.2	20.925
2019_SL	Y277.1	93.3333	24.3333	6.575	3.715	49.65	22.675
2019_SL	Y278.1	178.667	38	8.25	4.135	53.425	24.45
2019_SL	Y279.1	188.667	38	9.475	4.1275	54.9	23.825
2019_SL	Y281.1	204.667	41	10.1	4.0825	58.525	22.925
2019_SL	Y284.1	126.167	27.6667	8.1	4.2125	56.15	23.275
2019_SL	Y285.1	107.133	25.6667	6.525	3.7375	44.975	24.05
2019_SL	Y287.1	198.333	38.3333	9.6	4.43	59.8	27.225
2019_SL	Y288.1	127.767	28.3333	7.575	4.375	57.85	24.475
2019_SL	Y289.1	190.667	39	10.625	3.8425	60.95	23.725
2019_SL	Y29.1	139.333	23.3333	7.925	4.575	56.45	24.625
2019_SL	Y290.1	167.333	27.6667	7.4	5.15	53.45	30.325
2019_SL	Y291.1	121.767	27.3333	7.625	4.2125	51.175	23.9
2019_SL	Y292.1	113.6	26.3333	6.975	3.0225	51.7	20.075
2019_SL	Y293.1	153.667	29.6667	7.3	4.2	58.6	23.525
2019_SL	Y294.1	144.667	32.6667	8.125	3.3	57.9	21.9
2019_SL	Y296.1	141.633	27.6667	8.025	4.7375	58	23.475
2019_SL	Y299.1	177	32.3333	7.7	4.45	59.975	27.975
2019_SL	Y3.1	176.333	32.6667	9.075	3.9125	54.6	28.125
2019_SL	Y30.1	114	26	7.125	3.53	55.725	22.975
2019_SL	Y300.1	140.5	26.3333	8.225	4.4125	59.2	23.725
2019_SL	Y303.1	170.6	27.6667	8.5	5.5875	66.5	27.875
2019_SL	Y305.1	133.5	24	8.2	5.5125	58.5	28.125
2019_SL	Y306.1	235.667	40.6667	9.875	5.34	57.275	25.725
2019_SL	Y307.1	123.167	26	6.725	4.0875	53.075	21.475
2019_SL	Y308.1	114.333	22.6667	5.475	4.105	50.7	16.875
2019_SL	Y309.1	143.667	28.6667	6.775	4.45	53.6	25.275
2019_SL	Y31.1	116.167	19.3333	6.875	3.8875	53.35	23.3
2019_SL	Y310.1	136.333	36	9.85	3.5125	55.625	23.175
2019_SL	Y311.1	142	31.3333	9.3	4.0625	58.65	24.35
2019_SL	Y313.1	126.667	27.6667	6.925	4.5	60.475	23.75
2019_SL	Y315.1	214.667	38	10.35	5.025	59.45	27.325
2019_SL	Y316.1	191	33	11.075	4.6575	69.075	28.825
2019_SL	Y317.1	151.167	29.3333	8.375	4.175	61.3	24.15
2019_SL	Y318.1	182	28	8.225	6.1075	60.75	29.75
2019_SL	Y319.1	179.333	29	7.825	5.17	68.975	25.995
2019_SL	Y32.1	117.333	25	8.25	3.835	55.775	21.05
2019_SL	Y320.1	137.567	29.3333	7.825	4.375	59.3	24.875
2019_SL	Y321.1	175.333	31.3333	7.85	5.43	57.5525	25.85
2019_SL	Y322.1	132.667	29.6667	7.35	3.385	56.5	23.675
2019_SL	Y326.1	149.667	36.6667	8.9	3.475	60	20.85
2019_SL	Y327.1	138.9	28.6667	8.625	4.675	64.225	26.825
2019_SL	Y328.1	109.4	27.6667	8.05	4.3275	59.6	22.475
2019_SL	Y329.1	127.3	28.6667	8.1	4.5625	65.05	28.525
2019_SL	Y33.1	171.333	32.3333	9.825	4.4625	59.95	28.95
2019_SL	Y330.1	136.7	30.6667	8.325	3.5	60.4	22.6
2019_SL	Y331.1	146.6	28.3333	8.8	4.5875	58.55	25.175
2019_SL	Y333.1	152	30.6667	8.85	4.7875	57.35	27.05
2019_SL	Y335.1	121.667	25.6667	7.425	4.875	51.75	24.025
2019_SL	Y338.1	125.533	24.6667	8.35	4.95	59.5	27.25
2019_SL	Y339.1	156.667	33.6667	8.125	3.995	61.675	26.19
2019_SL	Y34.1	160.667	31.6667	9.625	3.9825	63.175	26.3
2019_SL	Y340.1	154	30.6667	7.075	3.705	54.65	20
2019_SL	Y341.1	136.667	29.6667	7.675	4.0525	56.375	19.75
2019_SL	Y343.1	147.667	30.6667	8.825	3.5725	64.2	23.375
2019_SL	Y344.1	155	35.6667	9.925	3.48	64.475	21.325
2019_SL	Y345.1	148	25.6667	8.175	4.6975	59.6	24.825
2019_SL	Y346.1	168.333	30.6667	7.875	4.9375	55.475	25.55
2019_SL	Y349.1	204.667	36.3333	10.5	4.7	66.4	22.225
2019_SL	Y35.1	120.667	27.6667	5.675	3.6625	52.9	21.2
2019_SL	Y355.1	147.667	25.3333	6.45	5.7175	52.95	17.975
2019_SL	Y356.1	171	31.6667	8.775	4.68	55.075	26.475
2019_SL	Y357.1	215.667	35.3333	9.475	5.3175	68.375	29.5
2019_SL	Y358.1	163.667	35.6667	9.575	4.4875	56.025	20.95
2019_SL	Y359.2	142	27	7.95	4.5525	52	22.175
2019_SL	Y36.1	126.667	28.6667	6.9	3.825	53.625	24.775
2019_SL	Y360.1	179.667	33	9.175	4.825	53.575	23.9
2019_SL	Y361.1	133	27.3333	7.75	4.425	54.7	22.4
2019_SL	Y363.1	160.667	31.6667	9.325	4.31	63.1	23.4
2019_SL	Y366.5	162	35.6667	7.95	3.865	60.625	21.5
2019_SL	Y367.1	154	31.6667	8.8	4.0375	60.475	20.35
2019_SL	Y37.1	136	26.6667	6.05	4.7675	45.475	23.85
2019_SL	Y370.1	128.667	27	7.1125	3.79	56.775	18.8
2019_SL	Y372.5	133.333	25.6667	6.55	3.125	49.85	17.925
2019_SL	Y373.2	145	27.6667	9.4	4.2	55.775	21.675
2019_SL	Y374.1	196	36.6667	10.175	4.65	58.725	24.1
2019_SL	Y376.1	138.333	26.3333	9	4.2775	53.05	24.8
2019_SL	Y378.1	133.667	30	8.15	3.6275	57.625	19.35
2019_SL	Y38.1	143.333	25.6667	8.625	3.8375	55.775	25.6
2019_SL	Y380.1	213.333	37	9.875	4.6	56.55	23.875
2019_SL	Y382.1	154.667	28	8.825	4.5175	56.925	25.925
2019_SL	Y383.1	226.667	35	9.525	5.35	60.625	27.125
2019_SL	Y384.5	144	32.6667	9.25	3.875	57.375	21.325
2019_SL	Y386.1	148.667	27.6667	8.3075	4.5425	56.55	24.025
2019_SL	Y387.1	141.333	31	8.5	3.4175	58.875	21.35
2019_SL	Y388.5	130.333	28	9.85	3.925	57.125	21.5
2019_SL	Y389.1	124	25.3333	6.675	4.495	53.15	23
2019_SL	Y39.1	94.5	22.6667	6.575	3	47.25	18.775
2019_SL	Y40.1	104.667	25	6.475	3.075	53.75	21.325
2019_SL	Y41.1	125.133	25.6667	7.65	4.325	60.25	25.85
2019_SL	Y42.1	132.633	27.3333	8.525	4.05	59.1	26.725
2019_SL	Y43.1	159.667	30.6667	8.6	3.63	54.2	23.3
2019_SL	Y44.1	120.1	25	7.55	3.975	56.95	24.475
2019_SL	Y46.1	185.667	29.6667	9.725	4.5175	57.825	29.25
2019_SL	Y48.1	138.933	26.6667	8.2	4.5125	58.475	26.825
2019_SL	Y49.1	93.6667	22.3333	6.45	3.09	52.475	18.15
2019_SL	Y5.1	136	31.6667	6.6	3.0025	56.025	21.425
2019_SL	Y51.1	162	26.6667	8.75	4.05	59.725	22.625
2019_SL	Y53.1	186	33.3333	9.25	4.105	53.525	23.4
2019_SL	Y55.1	145	26.3333	7.9	4.7375	57.1	24.75
2019_SL	Y56.1	139	27.6667	8.35	4.2125	58.3	27.325
2019_SL	Y57.1	130.833	26	7.55	4.275	57.675	26.2
2019_SL	Y58.1	152.833	27	8.75	5.15	56.25	26.4
2019_SL	Y59.1	144.333	28	8.375	4.3625	53.375	26.2
2019_SL	Y6.1	151	27.3333	7.7	4.9625	59.7	28.7
2019_SL	Y60.1	135.833	26	8.025	4.4875	55.85	27.425
2019_SL	Y61.1	159.333	29	8.175	4.6625	58.5	30.125
2019_SL	Y63.1	117.167	29	8.05	3.875	59.2	24.125
2019_SL	Y64.1	199	32.6667	10.9	4.62	77.45	28.675
2019_SL	Y65.1	144.1	31.6667	8.775	4.2125	64.425	27.425
2019_SL	Y66.1	162.167	27.3333	7.65	4.75	55.05	23.425
2019_SL	Y67.2	227.667	38	10.65	4.3025	67.825	27.925
2019_SL	Y68.1	134	28	8.575	4.0875	54	26
2019_SL	Y7.1	178	30	8.275	4.7225	61.4	26.85
2019_SL	Y70.5	122.667	27	7.675	3.8375	56	22.125
2019_SL	Y71.1	131.667	25.3333	7.225	4.3	55.675	24.5
2019_SL	Y72.1	170.333	32	7.725	5.65	59.175	30.4
2019_SL	Y73.1	113.533	27.6667	6.7	4.0375	55.075	23.275
2019_SL	Y74.1	129	28	8.225	3.9625	60.2	26.75
2019_SL	Y75.2	142	26	6.825	5.25	53.35	27.375
2019_SL	Y78.1	115.7	25.6667	7.075	4.275	53.075	22.425
2019_SL	Y8.1	188.333	31.3333	9.625	4.41	70	27
2019_SL	Y81.1	166.333	26.6667	9.425	4.9575	64.675	29.925
2019_SL	Y83.1	178.333	32	9.425	3.8425	61.375	25.45
2019_SL	Y86.1	154.833	25.6667	7.725	5.8375	51.675	22.675
2019_SL	Y88.1	187.667	32.3333	8.7	5.0375	61.625	28.25
2019_SL	Y89.1	134.067	27	7.175	5	57.9	27.35
2019_SL	Y9.1	181.667	32.3333	9.75	3.565	63.7	27.925
2019_SL	Y91.1	160	30	9.325	3.0625	58.7	23.275
2019_SL	Y92.1	145.833	28	8.6425	5.0375	53.875	27.775
2019_SL	Y93.1	172	27.6667	7.7475	5.975	60.55	30.375
2019_SL	Y94.1	131.833	28.3333	8.575	4.3	62.9	26.1
2019_SL	Y96.1	136.233	27	7.75	4.525	59.725	23.025
2019_SL	Y97.1	134.167	28.3333	8.075	4.25	59.45	28.025
2019_SL	Y98.1	128.767	28	8.95	5.025	65.8	28.525
2019_SL	Y99.1	183.333	30.3333	9.725	5.14	63.925	26.775
2020_SL	Y1.1	149.6	20.2	8.23875	3.87875	51.9375	26.8
2020_SL	Y10.1	163.2	26.2	8.15	5.315	62.65	28.6
2020_SL	Y100.1	160.2	32.4	8.7875	5.005	64.4	26.4875
2020_SL	Y101.1	211.2	33.2	8.7875	4.6125	70.3	31.0375
2020_SL	Y103.1	125.6	18	7.5125	4.2875	63.2875	29.75
2020_SL	Y106.1	178	24.4	8.1625	4.7375	63.4625	33.7
2020_SL	Y107.1	186.2	27.2	8.975	5.275	61.95	29.0625
2020_SL	Y110.1	156	26.4	8.1875	4.625	69.45	32.6
2020_SL	Y111.1	143	19.2	7.9875	4.2875	67.4875	30.8875
2020_SL	Y112.1	149.4	28.4	9.4625	4.2125	70.2375	35.4125
2020_SL	Y113.1	173.8	28.8	8.675	5.42625	71.6625	30.5
2020_SL	Y115.1	216.6	37	11.0125	5.15	70.5125	35.225
2020_SL	Y118.1	213.2	37.4	9.9	4.8625	66.8125	26.85
2020_SL	Y119.1	183.4	24.8	9	4.2625	60.8375	31.05
2020_SL	Y12.1	146	22	7.4125	3.5925	57.7	22.925
2020_SL	Y121.1	231.6	33.6	9.4375	5.89625	71.5125	29.3375
2020_SL	Y123.1	177.6	28.2	8.5	4.225	59.225	27.1125
2020_SL	Y124.1	221.8	35.6	9.425	5.6875	60.525	25.775
2020_SL	Y125.1	189.6	36.4	9.9125	5.2925	76.6375	29.4875
2020_SL	Y127.1	219	35.4	9.1	4.275	68.1	25.2
2020_SL	Y128.1	181.2	36.8	9.55	5.315	66.35	30.2375
2020_SL	Y129.1	229	38.2	10.8625	5.6525	69.175	34.0375
2020_SL	Y13.1	162.8	27.8	7.8375	5.30125	60.3625	28.9375
2020_SL	Y132.1	164.2	25.4	9.35	4.825	72.8125	31.3125
2020_SL	Y133.1	149.4	25.8	8.1875	4.35	53.525	28.7375
2020_SL	Y134.1	187.2	31.6	8.7625	4.97	66.375	28.05
2020_SL	Y136.1	165	33	8.2125	4.9125	54.6625	23.0125
2020_SL	Y138.1	142.4	24.4	8.7	4.9325	63.4875	32.15
2020_SL	Y14.1	178.8	21.6	6.825	4.06875	65.8125	29.55
2020_SL	Y142.1	180.2	27.6	9.4375	4.9375	63.7375	36.8
2020_SL	Y143.1	98.3333	21	7.4	3	50.3	15.3
2020_SL	Y144.1	127.6	23.8	7.625	3.5375	49.0625	24.6125
2020_SL	Y144.5	139.5	21	6.05	4.14	50.55	21.75
2020_SL	Y145.1	164.8	27.8	7.9875	5.08625	59.725	26.4875
2020_SL	Y146.1	147.8	22.2	7.9875	5.24	71.575	34.4375
2020_SL	Y147.1	107.8	21.6	8.3625	3.39875	49.7625	16.375
2020_SL	Y149.1	158.8	23.2	9.25	5.70375	73.2875	35.0375
2020_SL	Y150.1	130.4	23.2	8.6125	3.8125	65.4375	29.5375
2020_SL	Y151.1	168.8	23.6	7.5875	4.7375	53.7875	25.85
2020_SL	Y153.1	162.2	27.6	8.4875	5.3725	64.675	36.7125
2020_SL	Y159.1	165.4	27.6	9.25	4.0625	58.975	26.725
2020_SL	Y16.1	177	31.4	8.6375	5.1125	65.875	27.8375
2020_SL	Y161.1	126.8	22.4	6.5625	4.425	52.0375	25.5625
2020_SL	Y162.1	124.2	20.8	6.2625	4	52.6625	22.775
2020_SL	Y163.1	185.4	27.4	8.425	4.725	53.7125	29.075
2020_SL	Y164.1	180.25	30	8.575	5.26	61.9	30.35
2020_SL	Y17.1	188.6	25.4	8.0375	6.0625	59.4875	32.95
2020_SL	Y18.1	148	17	7.1	4.5125	62.05	31.175
2020_SL	Y19.1	155.8	24.6	8.6	4.125	53.5625	28.025
2020_SL	Y194.1	173.2	32.6	8.275	4.175	57.825	23.0625
2020_SL	Y194.5	163.4	32	8.7	4.2875	56.2	22.275
2020_SL	Y195.1	151	27.6	9.1	4.78375	70.3625	33.9375
2020_SL	Y196.1	112.4	23.8	8.35	3.75	61.1875	26.3625
2020_SL	Y197.1	118.8	25.2	9.025	3.51875	65.6875	25.65
2020_SL	Y198.1	124.4	22.2	8.1875	4.30875	72.975	28.8375
2020_SL	Y199.1	159.8	25.8	9.175	4.89875	71.275	29.8
2020_SL	Y2.1	193	33.6	9.4875	4.76125	69.0375	31.5125
2020_SL	Y200.1	187	24.2	9.15	3.66875	66.625	31.575
2020_SL	Y202.1	145.4	24.6	8.55714	3.56143	50.4714	19.4429
2020_SL	Y202.5	147.4	23	8.53333	4.02	59.3833	26.4667
2020_SL	Y204.1	173.8	25.8	10.3125	4.925	71.625	35.825
2020_SL	Y205.1	241.8	35.8	10.55	6.015	72.9875	37.725
2020_SL	Y206.1	203.4	28.4	9.75	4.8375	69.9875	32.5125
2020_SL	Y207.1	162.2	25.8	9.2	4.6375	74.275	32.9125
2020_SL	Y208.1	142	26.2	8.35	4.2875	67.075	32.65
2020_SL	Y208.5	146	22	8.4	4.9	66.4	29.8
2020_SL	Y209.5	170.5	26	7.5	4.79	64.85	24.6
2020_SL	Y210.1	140.4	28.4	8.3	3.44375	62.5125	24.225
2020_SL	Y211.1	160.2	25.8	8.475	4.99	72.5125	31.975
2020_SL	Y212.1	153.6	25.4	9.2625	4.9275	72.625	35.275
2020_SL	Y213.1	194.2	29.2	9.75	4.23	71.6	33.5875
2020_SL	Y214.1	181.8	26.8	8.6625	4.89875	72.7125	31.6375
2020_SL	Y215.1	136.8	24.8	9.025	4.34125	62.15	27.2125
2020_SL	Y217.1	160.4	26.6	8.4625	4.89875	66.875	28.625
2020_SL	Y218.1	147.6	21.8	9.075	4.68125	68.8875	31.4
2020_SL	Y219.1	228.8	28.6	9.1875	6.4075	63.9875	36.775
2020_SL	Y22.1	139.4	18.4	6.5	3.9625	57.025	26.1125
2020_SL	Y221.1	172	26	8.675	5.1725	67.275	32.1375
2020_SL	Y222.1	156.2	26	9.725	4.3125	62.5875	31.0875
2020_SL	Y223.1	195.4	27.2	9.575	4.2875	71.875	32.7125
2020_SL	Y224.1	203.6	28.6	11.525	3.6125	71.475	28.5375
2020_SL	Y226.1	185.4	34.6	10.0375	4.19375	74.9375	33.675
2020_SL	Y227.1	161.8	25.2	9.8125	4.84625	78.3125	34.15
2020_SL	Y228.1	134.8	24	9.6625	4.375	83.0875	35.8875
2020_SL	Y23.1	154	23.8	8.8125	3.89	59.725	28.3375
2020_SL	Y230.1	185.4	28	9.565	4.62375	76.125	31.5125
2020_SL	Y232.1	206.8	28.8	11.375	3.8875	84.525	24.55
2020_SL	Y233.1	161	25.6	10.2	4.45	79.8625	36.8625
2020_SL	Y234.1	178.6	27.2	9.65	4	66.75	31.775
2020_SL	Y235.1	187.2	24.2	10.0875	5.4625	79.8875	39.95
2020_SL	Y236.1	195.8	26.4	9.575	5.40125	74.95	39.8375
2020_SL	Y237.1	138.6	24.8	9.2625	5.15125	75.575	34.825
2020_SL	Y238.1	210.8	29.6	8.95	4.8	75.4	35.2375
2020_SL	Y239.1	188.4	24	10.8625	5.40875	80.0125	42.775
2020_SL	Y24.1	205	33.8	9.5	4.275	66.6875	27.2125
2020_SL	Y240.1	178.2	27.8	10	4.89125	81.8875	41.125
2020_SL	Y241.1	168	24.6	9.8125	4.575	81.4125	35.1875
2020_SL	Y242.1	178.8	24.8	9.6875	6.0925	72.775	38.3875
2020_SL	Y244.1	136.4	24	9.3875	5.15	76.525	33.6625
2020_SL	Y245.1	211	33.8	10.85	4.84	73.9625	33.275
2020_SL	Y246.1	176.8	25.6	9.675	6.10875	84.9875	36.425
2020_SL	Y247.1	189.2	25.2	10.175	6.0475	76.55	36.8875
2020_SL	Y248.1	148.4	24.8	9.0625	5.5625	74.1125	37.3375
2020_SL	Y25.1	154.8	23.6	8.3625	4.45	63.1875	28.75
2020_SL	Y250.1	145.2	25.2	9.6125	4.95	72.8375	33.2
2020_SL	Y251.1	200.6	29.4	9.225	4.475	69.3375	33.6625
2020_SL	Y252.2	240.4	29	10.95	5.8275	78.0625	42.05
2020_SL	Y253.1	182.2	24.2	8.95	6.05625	77.1	36.075
2020_SL	Y254.1	145.8	24.6	10.325	4.92625	81.8	36.275
2020_SL	Y255.1	221	34.4	10.5	4.8275	86.2625	38.8125
2020_SL	Y257.1	150.4	25.2	10.2625	5.7875	74.85	35.0125
2020_SL	Y26.1	163.6	28.2	8.1125	4.3625	62.125	27.15
2020_SL	Y260.1	157.6	22.8	9.4875	5.11	71.3125	31.2125
2020_SL	Y262.1	162	27.8	9.0625	4.5375	71.9625	32.5125
2020_SL	Y263.1	187.4	24.4	10.0875	5.69625	76.9625	35.3625
2020_SL	Y264.1	191.4	27.4	9.9625	5.77625	72.7	35.5375
2020_SL	Y265.1	229.4	27.6	10.3375	4.7125	69.825	34.5625
2020_SL	Y266.1	210.6	23.6	9.325	4.07125	75.6625	35.6875
2020_SL	Y267.2	193.4	25	10.6625	3.9625	73.3125	31.35
2020_SL	Y268.1	170.6	27.4	9.825	4.45625	79.2125	36.075
2020_SL	Y269.1	231.6	27	9.975	4.1125	83.25	34.2375
2020_SL	Y271.1	216	26.6	10.3875	3.78375	80.8	36.5375
2020_SL	Y272.1	162.4	25.2	9.7625	4.56875	82.8875	39.6375
2020_SL	Y273.1	173.4	23.4	10.4375	5.9875	77.675	37.8125
2020_SL	Y274.1	140.8	24.6	9.1625	4.65	76.775	34.8375
2020_SL	Y275.1	205	24.6	9.9625	5.9625	81.7375	38.825
2020_SL	Y276.1	157.4	23.8	9.5125	4.7125	76.15	33.4125
2020_SL	Y277.1	144.8	25.4	9.525	4.49375	81.625	35.5125
2020_SL	Y278.1	247.8	29.2	10.1875	4.725	69.0125	34.5625
2020_SL	Y279.1	267.4	32.6	10.5875	5.0625	77.4625	40
2020_SL	Y281.1	239.8	30	10.7125	4.225	73.4875	29.8125
2020_SL	Y284.1	172.2	26.4	9.4125	5.875	76.3125	33.2375
2020_SL	Y285.1	147.6	25.2	9.675	5.04125	69.6375	33.725
2020_SL	Y287.1	252.2	40.6	11.075	5.3175	78.9	40.075
2020_SL	Y288.1	161	25.8	9.7125	5.6875	74.2	33.325
2020_SL	Y289.1	211.4	30.6	11.025	4.0875	73.675	32.0625
2020_SL	Y29.1	168	24.8	8.1625	4.55	59.15	22.9625
2020_SL	Y290.1	228.2	27.8	9.75	5.74	68.725	40.0125
2020_SL	Y291.1	143.4	26.8	9.725	5.01625	74.3375	33.9375
2020_SL	Y292.1	136.4	26	9.0625	4.75	72.1125	29.3
2020_SL	Y293.1	204.2	28.8	10.1125	4.0875	78.5375	33.8
2020_SL	Y294.1	199.2	27.6	10.2625	3.3875	64.1125	22.5625
2020_SL	Y296.1	158.4	23.2	9.5125	5.65375	83.275	34.5875
2020_SL	Y299.1	220.8	27.8	10.7875	4.35	75.1625	34.875
2020_SL	Y3.1	216.8	33.6	8.95	4.7875	70.2625	26.4125
2020_SL	Y30.1	146.2	25.4	8.675	4.36375	63.5625	26.0875
2020_SL	Y300.1	176.4	23.8	9.925	5.47875	83.2125	38.1375
2020_SL	Y303.1	164	26.6	9.4375	4.65	76.4625	33.475
2020_SL	Y305.1	137.8	23	9.35	4.75	66.5125	37.525
2020_SL	Y306.1	225.4	38	10.25	5.9425	76.1625	38.1625
2020_SL	Y307.1	149.4	26.2	9.125	4.97875	75.2375	32.2
2020_SL	Y308.1	144	25.4	9.125	4.4125	75.4125	33.3375
2020_SL	Y309.1	184.4	26.8	8.7375	5.5575	76.9125	35.0375
2020_SL	Y31.1	135.2	18.4	7.825	3.975	60.85	25.9
2020_SL	Y310.1	171.4	24.6	8.25	3.50875	69.5625	33.8625
2020_SL	Y311.1	184.2	26.2	10.65	4.5375	71.8	29.225
2020_SL	Y313.1	172.6	24.2	7.3375	4.53875	78.65	29.8875
2020_SL	Y313.5	181.6	25.8	7.4125	4.82125	77.6875	31.2
2020_SL	Y315.1	193.4	37	9.4625	5.59	69.2	35.575
2020_SL	Y316.1	207.2	33	9.475	5.525	75.1625	32.525
2020_SL	Y317.1	179.2	27.2	9.1625	5.35875	77.275	33.0875
2020_SL	Y318.1	228	24	8.6125	5.255	64.05	36.05
2020_SL	Y319.1	189	26.2	9.0625	4.9875	74.8375	26.3125
2020_SL	Y32.1	145.6	21.4	8.125	3.4875	61.025	28.5
2020_SL	Y320.1	176.2	24.6	8.175	5.48125	77.8625	29.225
2020_SL	Y321.1	219.2	21.8	8.825	4.96	63.625	32.7625
2020_SL	Y322.1	155.8	23.8	8.675	5.185	81.0625	35.0375
2020_SL	Y326.1	198.8	27.6	9.175	4.475	64.725	23.7875
2020_SL	Y327.1	160.2	20.6	8.025	3.73625	74.9375	32.3375
2020_SL	Y328.1	172.2	25.2	8.9125	5.12625	74.8875	31.125
2020_SL	Y329.1	175	24.4	8.7875	5.02875	79.4	31.6125
2020_SL	Y33.1	173.2	32.8	9.5375	3.4125	56.45	26.8125
2020_SL	Y330.1	169.4	27	10.1625	3.4625	71.875	27.5375
2020_SL	Y331.1	176.4	24	9.2375	5.0275	78.3875	34.35
2020_SL	Y333.1	197.4	27.6	9.325	3.72625	74.8125	36.2
2020_SL	Y335.1	139.4	25.8	8.4625	4.475	76.1	33.625
2020_SL	Y338.1	141	25.8	9.475	4.575	73.575	34.075
2020_SL	Y339.1	207	29.4	10.9875	4	78.9125	31.7625
2020_SL	Y34.1	159	32.4	8.5625	3.475	54.9625	20.9625
2020_SL	Y340.1	220.8	31	10.75	4.0875	80.1375	29.55
2020_SL	Y341.1	189.6	26.2	9.8375	5.09375	77.975	30.525
2020_SL	Y343.1	189.6	26.6	10.55	3.7	76.2875	27.9125
2020_SL	Y344.1	181.2	40.2	9.92857	4.55	69.4143	22.6714
2020_SL	Y345.1	145.6	24.8	9.75	5.1	78.2	34.725
2020_SL	Y346.1	219.4	33	9.125	5.04875	73.425	40.1375
2020_SL	Y349.1	235.2	34	10.025	4.7725	79.4125	36.3875
2020_SL	Y35.1	160.4	20	8.1375	4.0375	59.75	25.9625
2020_SL	Y355.1	177	22	8.8	5.245	81.4875	35.775
2020_SL	Y356.1	228.2	43.4	10.975	5.175	72.6375	32.2
2020_SL	Y357.1	250.6	38.6	10.1375	5.9025	75.0375	33.45
2020_SL	Y358.1	212.2	44.2	11.5875	4.9875	86.6875	30.925
2020_SL	Y359.2	145.8	25.2	8.4	4.14375	74.125	30.1125
2020_SL	Y36.1	170	22.6	8.5375	4.05	64.35	30.9125
2020_SL	Y360.1	224.6	40	11.3125	4.55	73.75	31.475
2020_SL	Y361.1	148.8	25.2	9.725	4.3375	80.4375	32.9625
2020_SL	Y363.1	199.6	29.2	9.4875	3.7225	80.9	35.55
2020_SL	Y366.5	226	40.4	9.2375	5.14125	70.6875	26.7125
2020_SL	Y367.1	183.667	36.6667	8.36667	4.45667	61.1667	22.1
2020_SL	Y37.1	186.6	24.4	7.0875	4.29625	53.7375	30.4875
2020_SL	Y370.1	173.8	26.6	8.925	4.10625	79.5375	32.6
2020_SL	Y372.1	156.2	25.6	8.85	4.985	72.7625	34.3875
2020_SL	Y372.5	207.8	24.4	9.3375	5.22625	77.9375	35.35
2020_SL	Y373.2	190.4	39.6	9.425	4.64625	64.9875	27.9
2020_SL	Y374.1	220.4	44.8	12.225	4.3	75.3625	35.9125
2020_SL	Y376.1	190.6	24.8	10.675	5.8675	79.7625	37.95
2020_SL	Y378.1	167.8	27	8.5	3.4375	72.9	32.1375
2020_SL	Y38.1	179.8	32.4	9.7125	3.55	64.85	28.6375
2020_SL	Y380.1	203	37.2	8.9125	5.83625	60.3625	29.375
2020_SL	Y382.1	170.4	23.4	8.7625	5.67375	68.725	31.725
2020_SL	Y383.1	201.2	32.4	9.525	5.5725	68.4875	28.2125
2020_SL	Y384.5	185.2	33.4	9.98	5.086	74.22	30.66
2020_SL	Y386.1	187.6	22.4	8.825	4.35625	73.275	33.525
2020_SL	Y387.1	187	37	9.625	4.74875	63.2125	28.2375
2020_SL	Y388.5	177.2	36.8	9.875	4.24	75.625	29.5875
2020_SL	Y389.1	145.4	24	7.9875	4.9	68.0375	31.9875
2020_SL	Y39.1	148.4	18.8	9.7125	4.1625	70.025	30.9625
2020_SL	Y40.1	152.6	20.2	7.5125	3.7875	61.4	24.1
2020_SL	Y41.1	165	20.2	7.9375	4.325	66.3625	29.35
2020_SL	Y42.1	179.2	19.8	9	4.06625	62.425	29.15
2020_SL	Y43.1	152.4	19	7.825	4	61.8875	27.1
2020_SL	Y44.1	134.8	26.4	7.8875	4.4	67.3625	28.0875
2020_SL	Y46.1	194.2	32	10.7125	4.15	65.925	32
2020_SL	Y48.1	162.6	18.2	8.55	5.4	66.7625	31.6625
2020_SL	Y49.1	145.8	19.4	8.4875	4.2875	64.3875	27.1375
2020_SL	Y5.1	165.6	30.6	7.875	4.05	60.6	25.175
2020_SL	Y51.1	181.4	33.4	8.775	3.825	57.6375	21.8375
2020_SL	Y53.1	203.4	31.4	9.2125	4.225	60.3	28.3875
2020_SL	Y55.1	135.8	25	10.025	3.4	66.5	26.7125
2020_SL	Y56.1	134.4	26.4	8.6375	3.375	68.3375	29.175
2020_SL	Y57.1	150.2	26.2	9.275	3.8625	71.7125	30.6125
2020_SL	Y58.1	181.4	28.6	9.5875	4.56875	61.575	30.2375
2020_SL	Y59.1	171.6	20.6	9.0625	4.36375	71.3375	33.6
2020_SL	Y6.1	165.4	20.2	7.25	4.18125	57.4	29.8125
2020_SL	Y60.1	156.2	18.2	9.3875	5.025	70.4	35.4625
2020_SL	Y61.1	162.8	20	8.3625	4.525	55.5125	33.3125
2020_SL	Y63.1	138.2	24.4	8.8625	3.65625	74.425	32.55
2020_SL	Y64.1	190.4	32.4	10.6125	3.7125	79.95	34.5
2020_SL	Y65.1	148	26.4	10.3375	3.86875	85.0625	35.65
2020_SL	Y65.5	145.6	27.2	10.1625	4.05	83.5875	34.3375
2020_SL	Y66.1	155.2	25.6	9.4875	4.61875	77.075	34.1125
2020_SL	Y67.2	208	33.6	10.7125	4.3125	69	36.675
2020_SL	Y68.1	138.2	25	8.9125	4.575	67.85	30.95
2020_SL	Y7.1	166.4	31.6	9.0125	3.625	59.875	23.5875
2020_SL	Y70.1	134.4	25.8	8.2875	4.425	66.2125	29.4375
2020_SL	Y70.5	139.4	24.6	8.4375	4.675	72.2625	30.725
2020_SL	Y71.1	149.4	25.8	8.45	5.2875	72.4125	31.45
2020_SL	Y72.1	196.2	26.2	8.0875	5.4875	61.4875	28.525
2020_SL	Y73.1	121.8	25.4	8.725	4.15	62.8125	28.15
2020_SL	Y73.5	133.2	25.6	8.45	4.1875	65.6875	33.25
2020_SL	Y74.1	125.6	26.6	8.7875	4.075	60.9375	31.525
2020_SL	Y74.5	150	27	9.6	4.5125	70.6625	32.0875
2020_SL	Y75.2	185	26	8.725	4.925	66.15	33.4875
2020_SL	Y78.1	124.2	18.2	7.775	4.5	67.1125	29.3375
2020_SL	Y8.1	178.6	33	8.1875	4.1625	60.5875	21.725
2020_SL	Y81.1	193.6	28.6	8.8625	4.975	64.475	31.4875
2020_SL	Y83.1	181.8	32.6	9.275	3.6375	63.9375	24.525
2020_SL	Y86.1	179.6	18.8	9.325	6.9625	56.2875	26.2625
2020_SL	Y88.1	201.4	31.6	7.95	4.5125	60.825	29.75
2020_SL	Y89.1	182.4	22.2	8.0875	5.5125	67.9625	25.9
2020_SL	Y9.1	167	33.2	8.8375	4.2125	58.975	26.3
2020_SL	Y91.1	143.8	34.6	9.525	3.075	57.5875	23.5625
2020_SL	Y92.1	179.6	28	8.9625	4.8125	62.2875	26.325
2020_SL	Y93.1	203.2	23.4	8.2375	6.35	68.3375	31.075
2020_SL	Y94.1	160.2	21.6	8.975	4.7625	65.0125	29.7
2020_SL	Y96.1	174.8	21.6	8.85	5.0575	74.35	31.2875
2020_SL	Y97.1	166.8	25.8	7.65	4.1375	60.625	25.1125
2020_SL	Y98.1	153	19	7.95	4.56375	65.6875	27.6
2020_SL	Y99.1	181.2	33.2	9.6125	5.43875	69.075	29.7375
2018_YH	Y1.1	169	28	10.73	4.617	57.92	31.17
2018_YH	Y10.1	194.33	31.67	11.83	5.15	73	30.58
2018_YH	Y100.1	188.33	27.67	10.17	4.483	64.67	23.83
2018_YH	Y101.1	213.33	31.67	10.5	4.8	70	29.5
2018_YH	Y103.1	173.67	25.67	9.17	5.5	66.83	28.33
2018_YH	Y106.1	250	27	10.67	6.967	69	36.58
2018_YH	Y107.1	248.33	30	11	6.7	70.75	36.25
2018_YH	Y110.1	209.67	27.67	10.5	7	76.25	31.92
2018_YH	Y111.1	199.33	28.67	8.5	3.983	67.33	26.42
2018_YH	Y112.1	183.33	29.67	11.67	4.633	71.08	26.67
2018_YH	Y113.1	235	30	10.17	4.983	73.08	33.58
2018_YH	Y115.1	265.33	33.67	11.33	6.267	66.67	35.83
2018_YH	Y118.1	218.33	33	13	5.767	83.17	32.42
2018_YH	Y119.1	251.33	29.67	10.83	6.183	68	31.33
2018_YH	Y12.1	232	28	9.83	3.7	65.25	24.75
2018_YH	Y121.1	191.67	31.67	8.5	4.283	54	20.08
2018_YH	Y123.1	241	30.33	12.33	5.567	70	34.67
2018_YH	Y124.1	275.33	40.67	13	5.433	71.67	34.25
2018_YH	Y125.1	162.33	28.67	12.17	4.9	72.83	24.67
2018_YH	Y127.1	194.67	32.67	8.67	4.4	58.33	21
2018_YH	Y128.1	239	41	11.5	5.483	72.83	33
2018_YH	Y129.1	220	32	11.67	6	68	31.08
2018_YH	Y13.1	205	25.33	10.5	5.5	71.33	33.92
2018_YH	Y132.1	223.33	29	11	5.333	73.33	32.83
2018_YH	Y133.1	180.67	28	10	5.75	61.17	29.17
2018_YH	Y134.1	117	21.33	7.33	4	40.33	13.83
2018_YH	Y136.1	143	27	8.8	3.8	53.4	22.8
2018_YH	Y138.1	193.33	28	10.5	4.817	64.5	27.67
2018_YH	Y14.1	218.33	28.33	9.83	4.933	74.17	30.58
2018_YH	Y142.1	213.33	27.33	10.83	5.75	69.5	32.67
2018_YH	Y143.1	149.33	26.67	9	3.933	50.33	16.67
2018_YH	Y144.1	158.67	27.33	8.67	4.033	52.67	21
2018_YH	Y145.1	209.33	27.67	10.33	4.75	73	31.08
2018_YH	Y146.1	195.67	27.67	10.33	5.083	79	35.17
2018_YH	Y147.1	150.33	30	9.67	3.883	60.33	22.75
2018_YH	Y149.1	215	25.33	11.33	5.85	78.83	38.08
2018_YH	Y150.1	195	25.33	11.83	5.517	78.17	37
2018_YH	Y151.1	216.67	28.67	10.33	5.833	72	36.42
2018_YH	Y153.1	210	27.67	11.5	5.317	77.33	40.17
2018_YH	Y159.1	193.33	27.67	10.67	4.833	70	31.17
2018_YH	Y16.1	203.33	30.67	10.17	5.25	73.5	32.58
2018_YH	Y161.1	180	24	10.17	5.367	79.5	43.33
2018_YH	Y162.1	164.67	29	7.33	3.967	54.67	19.5
2018_YH	Y163.1	203.33	33.67	13	5.05	77.33	37.58
2018_YH	Y164.1	211.67	27.33	10.67	5.383	71	36.33
2018_YH	Y17.1	225	27.33	10.5	5.783	60.83	31.67
2018_YH	Y18.1	180.33	27	10.83	6.467	78	35.08
2018_YH	Y19.1	193.33	26.67	10	5.767	65.17	29.25
2018_YH	Y194.5	151	25	8.67	4.1	63.67	22.67
2018_YH	Y195.1	190	27	11.33	5.35	81.83	35.33
2018_YH	Y196.1	196.67	26	10.67	5.917	86.5	34.83
2018_YH	Y197.1	186	26.67	9.33	5.7	72.83	31.33
2018_YH	Y198.1	213.33	27	10.33	5.2	80.83	33.5
2018_YH	Y199.1	189.33	27.67	10.17	5.417	84.17	35
2018_YH	Y2.1	208.33	39.33	10.67	5.6	68.33	24.67
2018_YH	Y200.1	192.67	25.33	8	5.183	69.83	33.08
2018_YH	Y202.5	148	21.67	6.67	4.167	67.67	25.33
2018_YH	Y204.1	193.33	26.33	11.33	4.833	81.17	34.33
2018_YH	Y205.1	241.67	35	11.17	5.483	70.83	38.83
2018_YH	Y206.1	234.33	29.33	10.67	5.667	71.33	36
2018_YH	Y207.1	178.67	25.67	9	5.083	71.67	28.58
2018_YH	Y208.1	172.33	25.33	8	4.833	62.83	27
2018_YH	Y210.1	183.33	30	9.5	4.233	70.67	29
2018_YH	Y211.1	185	28	8.33	5.083	70	26.92
2018_YH	Y212.1	176	30	11.17	4.967	73.5	32.25
2018_YH	Y213.1	194	28.33	8.75	4.325	70	33
2018_YH	Y214.1	209.33	27.33	9.33	5.15	74.25	31.33
2018_YH	Y215.1	190.33	29	10.33	5.033	72.67	33.83
2018_YH	Y217.1	195	29	10	5.733	71.83	33.67
2018_YH	Y218.1	172.33	26.33	9.17	5.383	70.33	29.83
2018_YH	Y219.1	226.67	27	11.17	7.017	70.83	45
2018_YH	Y22.1	153	24	9.33	4.25	62.5	25.92
2018_YH	Y221.1	192.67	28	10.17	5.233	70	32.5
2018_YH	Y222.1	201	28	9.83	5.133	68.83	32.42
2018_YH	Y223.1	229.33	29.67	10.67	6.133	73.83	37.75
2018_YH	Y224.1	180	27	10.25	5.025	56.75	24.25
2018_YH	Y226.1	196.67	31	11.17	4.95	69	24.25
2018_YH	Y227.1	167.33	28.33	10.67	5.45	74.67	34.33
2018_YH	Y228.1	87.33	18.67	5	3.867	46	17.33
2018_YH	Y23.1	191	25.33	9.83	5.3	62.17	29.58
2018_YH	Y230.1	190	28	10.33	4.967	73.67	28.17
2018_YH	Y232.1	206.67	31	12.83	4.917	82.5	31.5
2018_YH	Y233.1	201	28	10	5.75	72.17	32.83
2018_YH	Y234.1	202.67	30.33	9.83	6.167	63.33	31.67
2018_YH	Y235.1	197.67	28	10.33	5.7	65.5	31.83
2018_YH	Y236.1	202.67	30.33	9.5	6.2	61.17	34.25
2018_YH	Y237.1	198	30.33	9.67	5.75	74.83	34
2018_YH	Y238.1	242	30.33	9.67	6.15	75.83	35.17
2018_YH	Y239.1	210.67	27.67	9.5	6.067	62	32
2018_YH	Y24.1	223.33	35	10.67	5.4	67	30.5
2018_YH	Y240.1	201.33	27.67	9.67	5.117	74.5	33.08
2018_YH	Y241.1	176.67	27	9.67	5.783	68.33	33.17
2018_YH	Y242.1	229.67	30.67	9.33	6.067	65.67	36
2018_YH	Y244.1	181.67	31	9	5.183	66	29.67
2018_YH	Y245.1	203.33	36.67	11.67	5.4	72	33.08
2018_YH	Y246.1	201.33	34	9.17	5.967	70.17	29.17
2018_YH	Y247.1	181.33	31.67	9.17	5.883	65.83	29.33
2018_YH	Y248.1	184.67	32.67	9.5	5.633	67.83	32.67
2018_YH	Y25.1	186	25.33	10.33	5.417	72.5	32.25
2018_YH	Y250.1	188	28.67	9.67	4.883	69.33	34
2018_YH	Y251.1	241.67	34	9.67	5.383	67	31.58
2018_YH	Y252.2	253	32.33	10.83	5.933	65.17	36.25
2018_YH	Y253.1	218	30	9.67	5.717	69.67	36.33
2018_YH	Y254.1	166.33	28.33	10.17	4.883	69.67	28.33
2018_YH	Y255.1	184	34.33	11.33	5.15	77.67	34.33
2018_YH	Y26.1	199	30	11.17	5.117	69.67	30.83
2018_YH	Y260.1	178.33	28	9.5	5.35	72.5	32.08
2018_YH	Y262.1	195.67	36.67	9.33	5.567	69.67	28.5
2018_YH	Y263.1	206	34.67	10.5	5.517	64.33	28.67
2018_YH	Y264.1	180	30.67	8.83	5.683	61.83	25.5
2018_YH	Y265.1	254.33	40.67	10.67	5.65	65	31.67
2018_YH	Y266.1	197.33	32	9.5	5.2	61	28.5
2018_YH	Y267.2	172.33	31.33	10.5	4.5	62.67	28
2018_YH	Y268.1	230	33.67	10.5	5.083	68.83	28.92
2018_YH	Y269.1	208.33	32.67	10.17	4.867	72.17	28.67
2018_YH	Y271.1	210.33	37	11.33	5.083	72.83	32.17
2018_YH	Y272.1	217.67	28.33	10.17	5.4	82.17	35.5
2018_YH	Y273.1	213.67	29.33	11.17	5.8	82.17	41
2018_YH	Y274.1	216.33	27.33	10.5	4.983	73.83	33.42
2018_YH	Y275.1	220	29	10.33	5.517	70.5	35.67
2018_YH	Y276.1	197.67	30	10.33	4.983	68.33	28.17
2018_YH	Y277.1	167.67	25.67	9.5	5.4	68.67	33
2018_YH	Y278.1	275	38.67	10.83	5.383	65.5	33.92
2018_YH	Y279.1	187.33	31	11	5.517	75.67	37
2018_YH	Y281.1	225.67	38	11	5.483	68	27.5
2018_YH	Y284.1	186.33	32.33	10	5.1	74.83	33.08
2018_YH	Y285.1	208	32.67	9.67	5.517	65	28.25
2018_YH	Y287.1	254.33	40	10.5	6.05	68.5	35.75
2018_YH	Y288.1	220.33	33.67	10.5	5.433	76.33	36.33
2018_YH	Y289.1	206.67	32.67	10.67	5.15	70.33	35.5
2018_YH	Y29.1	180	25.67	9.83	5.033	70	31.17
2018_YH	Y290.1	179	28	10.5	5.767	65.83	39.33
2018_YH	Y291.1	191.67	29.67	10.4	4.38	68.4	33.2
2018_YH	Y292.1	179	28	9.5	4.633	74	31.75
2018_YH	Y293.1	206.67	32.67	11	4.683	78	33.67
2018_YH	Y294.1	178	31.33	11.67	4.817	68.5	25.17
2018_YH	Y296.1	188.33	29	10.33	5.667	77	32.75
2018_YH	Y299.1	208.33	35	10.17	5.283	64.17	26.67
2018_YH	Y3.1	180	28.67	10.67	5.05	71	30.92
2018_YH	Y30.1	162.33	26	11.17	5.083	71.5	28.33
2018_YH	Y300.1	200	36.67	10.5	5.283	68.17	30.33
2018_YH	Y303.1	216	28.67	9.67	5.367	68.5	29.58
2018_YH	Y305.1	190	28.67	9.17	5.367	61.17	32.33
2018_YH	Y306.1	223.33	30.67	10.67	5.233	70.5	37.83
2018_YH	Y307.1	185	28.67	9.33	4.983	68	27.83
2018_YH	Y308.1	213.33	27.33	10.33	5.3	67	27.83
2018_YH	Y309.1	201.67	27	9.67	4.983	68.67	31.08
2018_YH	Y31.1	180.67	24.67	10.17	4.367	78	29.67
2018_YH	Y310.1	181.67	28.67	8	4.775	56.75	17.75
2018_YH	Y311.1	203.33	30.33	13.17	4.733	75.17	39.5
2018_YH	Y313.1	121.5	18.5	8.5	3.95	47.5	18.5
2018_YH	Y315.1	225	35.67	12.67	5.533	72.67	40.67
2018_YH	Y316.1	223.33	32.33	10.17	4.267	60.83	29.17
2018_YH	Y317.1	174.33	28	9.67	4.633	67.83	27.17
2018_YH	Y318.1	225	29	10.5	5.583	70	39.83
2018_YH	Y319.1	176.67	28.33	10.67	5.45	75.33	33.92
2018_YH	Y32.1	189.67	28.33	9.83	4.1	64.17	25.75
2018_YH	Y320.1	179	25.33	9	4.1	65.67	25.42
2018_YH	Y321.1	236.67	30	10.83	4.633	63.83	35.67
2018_YH	Y322.1	174.33	33.33	10.5	4.55	69.67	26.17
2018_YH	Y326.1	165.67	29.67	10.67	4.383	63.17	27
2018_YH	Y327.1	191.67	28.33	10.33	5.15	79.5	38.83
2018_YH	Y328.1	166	27	10	4.917	69.5	31
2018_YH	Y329.1	195	27	9.83	5.2	71.5	30.83
2018_YH	Y33.1	201.67	33.67	11.17	4.533	66.67	29.8
2018_YH	Y330.1	190	33	10.83	4.65	73.83	29.33
2018_YH	Y331.1	191	29	11	5.467	79	38.5
2018_YH	Y333.1	206.67	32.33	11	5.383	78.5	36.67
2018_YH	Y335.1	211.67	31.33	10.33	5.483	67.83	37.67
2018_YH	Y338.1	188.33	27.33	10.17	4.633	67.5	31.17
2018_YH	Y339.1	213.33	33	11.17	4.867	72.5	38.17
2018_YH	Y34.1	182	21.33	11.67	4.75	68.67	26.83
2018_YH	Y340.1	186	33.67	10.67	5.2	73.17	29.5
2018_YH	Y341.1	174.67	30.33	10.83	4.583	69.5	27.17
2018_YH	Y343.1	194	35.33	10.83	4.767	68.83	27.67
2018_YH	Y344.1	187	34.67	11	4.75	72.67	27
2018_YH	Y345.1	180.67	35.67	9.67	5.55	78.17	34.83
2018_YH	Y346.1	225	31.67	10.17	5.617	72.17	40.33
2018_YH	Y349.1	193.67	33.67	9.83	5.317	63.33	26.83
2018_YH	Y35.1	126.67	21.33	7.33	4.033	56.17	21.75
2018_YH	Y355.1	172	30.33	9	4.95	71	34.83
2018_YH	Y356.1	226.67	36.33	11.83	5.333	71.5	37.33
2018_YH	Y357.1	247.67	35.33	11.5	5.783	73	44.67
2018_YH	Y358.1	153.67	38.33	9.5	4.567	64.17	27.17
2018_YH	Y359.2	191	27.67	9.83	4.933	73	34.33
2018_YH	Y36.1	210	28.33	11.5	5.083	74.5	32.33
2018_YH	Y360.1	216.33	38.33	12	4.65	69.33	34
2018_YH	Y361.1	168	34.33	9.17	4.75	72	28.33
2018_YH	Y363.1	180.33	37.33	11.83	4.633	75.83	35.5
2018_YH	Y367.1	192.67	35.33	10.33	4.367	61.67	28.83
2018_YH	Y368.1	110	28	7	4.7	68	30
2018_YH	Y37.1	256.33	29	10.17	6.3	63.5	32.33
2018_YH	Y370.1	170.67	32.33	10	5.017	74.33	30.67
2018_YH	Y372.5	149.33	30	8	4.867	55.33	23.67
2018_YH	Y373.2	180.67	37	10.67	4.9	67.33	32
2018_YH	Y374.1	207.33	44.67	10.5	4.817	64.33	29
2018_YH	Y376.1	194	36.33	9.75	5.467	71	33.17
2018_YH	Y378.1	114.67	29.33	8.83	3.4	68.33	24
2018_YH	Y38.1	185	30	10.67	4.667	70.33	26.92
2018_YH	Y380.1	242.67	37	9.58	5.75	62.5	30.67
2018_YH	Y382.1	199.67	32.33	8.5	6.283	68.83	28.33
2018_YH	Y383.1	275.67	38.67	10.08	6.383	64	34.5
2018_YH	Y384.5	122.33	27.33	.	.	.	.
2018_YH	Y386.1	215.33	30.33	8.33	5.567	64.5	30.67
2018_YH	Y387.1	206	39.67	12.25	4.55	72.25	33.25
2018_YH	Y389.1	177.67	29.67	8.42	5.6	67.5	29.33
2018_YH	Y39.1	151.67	25.33	8.8	4.4	64.3	23.1
2018_YH	Y40.1	138.67	26.33	9	3.65	63.25	22.62
2018_YH	Y41.1	185.67	26	9.83	5.433	77.83	26.33
2018_YH	Y42.1	221.67	26.33	11.33	4.683	75.08	27.58
2018_YH	Y43.1	186.67	31.33	11.17	4.167	72.17	27
2018_YH	Y44.1	154.33	26	10.5	5.7	74.83	29.42
2018_YH	Y46.1	230	45	10.67	5.967	67.33	32
2018_YH	Y48.1	221.67	29	10	5.4	73	28.92
2018_YH	Y49.1	160.33	25.67	9.67	4.4	67	21
2018_YH	Y5.1	177.67	30	9.33	4.483	63.33	26.42
2018_YH	Y51.1	187.33	30.67	11.33	4.733	74.17	27.5
2018_YH	Y53.1	210	32.33	10.83	5.433	70.17	28.83
2018_YH	Y55.1	211.67	29	10.33	6.117	75.5	26.33
2018_YH	Y56.1	193.33	28.33	8.17	5	57.83	25.33
2018_YH	Y57.1	186.33	28	9.83	5.333	71.83	28.83
2018_YH	Y58.1	225	27.67	10	6.25	61.83	29.33
2018_YH	Y59.1	211.67	25.67	10.17	5.983	74.5	30.83
2018_YH	Y6.1	216.67	27	10.17	5.667	70	34.5
2018_YH	Y60.1	205	28.67	11.5	5.3	68	29.33
2018_YH	Y61.1	195.33	25.33	10	5.783	66.17	31.33
2018_YH	Y63.1	185.33	28	9.67	4.683	69.5	25.17
2018_YH	Y64.1	196.67	31.33	11.67	3.933	76.67	29.67
2018_YH	Y65.1	160	27	9.2	3.86	63.2	23.7
2018_YH	Y66.1	181.67	26.33	9.17	4.45	67.17	25
2018_YH	Y67.2	234	36.67	11	4.6	68	27.83
2018_YH	Y68.1	175	26	10	4.083	62.33	26.83
2018_YH	Y7.1	154.67	26.67	9	4.583	58	23.83
2018_YH	Y70.5	145	24	7	4.35	57	21.5
2018_YH	Y71.1	185	26	9.5	5.283	67.67	25.5
2018_YH	Y72.1	250	28	10.67	5.867	65.5	35.25
2018_YH	Y73.1	144	25	8	3.9	57	21.5
2018_YH	Y74.1	138	22	7	4.5	57	22
2018_YH	Y75.2	210	26.33	11.17	5.75	70.83	36.75
2018_YH	Y78.1	182.33	24	9.67	5.55	71.67	28.83
2018_YH	Y8.1	183.67	27.33	10.83	5.133	67	27
2018_YH	Y81.1	238.33	30.33	11	5.567	68.83	31.58
2018_YH	Y83.1	210	35	10.5	5.033	66.67	22.5
2018_YH	Y86.1	272.33	29	10.67	7.55	62.5	27.92
2018_YH	Y88.1	235	32.33	10.17	5.633	66.33	31
2018_YH	Y89.1	181.33	26.67	9.5	4.35	67.33	26.25
2018_YH	Y9.1	196.67	34.33	10.5	4.767	69	30
2018_YH	Y91.1	184.67	34.67	11.33	4.117	70.33	25
2018_YH	Y92.1	218.67	27.33	11.33	5.1	79.83	32.33
2018_YH	Y93.1	213.33	27.33	10.17	5.483	65.5	31.25
2018_YH	Y94.1	201.67	27.67	9.83	5.017	67.83	26.5
2018_YH	Y96.1	186.33	28.33	9.17	4.4	69.83	25.92
2018_YH	Y97.1	198.33	27.33	10.5	5.183	72	32.75
2018_YH	Y98.1	205	27.67	10.5	4.35	73.67	30.08
2018_YH	Y99.1	213.33	33.33	11	4.783	67.17	26.67
2019_YH	Y1.1	165.498	24.4975	7.75	4.35	48	24.35
2019_YH	Y10.1	190.333	29.42	8.325	4.15	60.075	25.925
2019_YH	Y100.1	210.08	32.4175	9.75	4.365	64.025	27.025
2019_YH	Y101.1	233.333	31.79	8.75	4.395	61.925	28.025
2019_YH	Y103.1	179.67	22.415	7.875	4.3625	57.95	26.925
2019_YH	Y106.1	212.5	28.5	9.35	5.1775	62.95	37.575
2019_YH	Y107.1	199.333	27.2475	8.5	4.7	60.65	30.875
2019_YH	Y110.1	189.915	22.165	7.675	5.7375	62.95	28.325
2019_YH	Y111.1	174.835	22.1675	7.725	4.5825	61.975	24.575
2019_YH	Y112.1	175.83	25.4175	8.525	4.7225	62.575	27.675
2019_YH	Y113.1	194.252	27	8.675	5.0125	61.55	29.45
2019_YH	Y115.1	248.455	33.415	8.975	5.1325	55.25	25.025
2019_YH	Y118.1	191.585	30	10.25	4.005	62.875	24.95
2019_YH	Y119.1	209.083	27.6675	9.475	3.9975	57.225	27.8
2019_YH	Y12.1	177.25	24.25	6.5	2.7625	45.3	17.275
2019_YH	Y121.1	187.92	28.9175	8.825	4.33	64.975	22.35
2019_YH	Y123.1	227.252	26.3325	8.675	4.965	59.75	29.875
2019_YH	Y124.1	253.955	39.665	10.475	4.755	65.525	29.475
2019_YH	Y125.1	175.583	25.9175	9.175	3.9875	66.65	25.775
2019_YH	Y127.1	228.42	35.79	8.875	4.46	66.2	29.25
2019_YH	Y128.1	237.252	39.5	10.375	4.385	65.75	30.35
2019_YH	Y129.1	208.75	28.4975	9.5	4.7675	62.025	30.275
2019_YH	Y13.1	197.5	24.58	7.125	4.025	57.35	24.6
2019_YH	Y132.1	217.083	28.25	8.1	4.1125	57.075	24.45
2019_YH	Y133.1	196.42	28.5025	7.825	4.45	54.45	27.35
2019_YH	Y134.1	117	21.33	6.875	3.15	57.275	24.825
2019_YH	Y136.1	163.25	26.0025	8.575	3.65	57.875	24.225
2019_YH	Y138.1	187.083	28.2475	7.775	4.3	54.675	27.125
2019_YH	Y14.1	195.08	24.58	6.5	4.8875	57.4	23.525
2019_YH	Y142.1	200.835	26.085	8.35	4.765	55.75	27.925
2019_YH	Y143.1	197.33	27.165	7.65	3.6625	57.6	24.8
2019_YH	Y144.1	179.167	25.08	8.2	4.1	59.175	27.1
2019_YH	Y145.1	194.833	26.17	7.25	5.65	54.2	25.85
2019_YH	Y146.1	181.42	25.165	6.85	5.33	58.6	24.675
2019_YH	Y147.1	174.585	27.2475	10.075	3.5775	66.35	25.875
2019_YH	Y149.1	211.25	25.8325	8	5.1125	55.95	27.725
2019_YH	Y150.1	198.75	25.8325	6.85	4.1875	51.125	25.175
2019_YH	Y151.1	209.17	24.92	6.225	4.6375	47.075	20.525
2019_YH	Y153.1	202.5	25.6675	6.95	4.525	43	22.65
2019_YH	Y159.1	203.335	27.67	7.525	4.125	49.775	21.075
2019_YH	Y16.1	201.71	30.5425	9.175	5.3275	71.9	30.025
2019_YH	Y161.1	174.998	24.75	5.9	4.39	43.45	16.35
2019_YH	Y162.1	203.67	26.5025	6.375	3.7	37.425	15.075
2019_YH	Y163.1	212.833	34.165	8.525	3.9625	56.95	23.275
2019_YH	Y164.1	242.915	28.83	8.7	5.15	54.5	30.3
2019_YH	Y17.1	182.25	26.085	7.425	5.425	55.5	27.375
2019_YH	Y18.1	192.585	23.25	7.175	3.9875	61.5	26.55
2019_YH	Y19.1	186.58	24.915	8.05	3.725	52.925	26.525
2019_YH	Y194.5	190.248	27.25	8.825	4.275	66.5	27
2019_YH	Y195.1	190	27	7.625	3.8625	59	26.45
2019_YH	Y196.1	196.67	26	6.475	3.925	59.675	21.175
2019_YH	Y197.1	183.998	23.415	6.5	3.5	56.175	20.725
2019_YH	Y198.1	210.833	24.2475	6.1	3.9125	54	23.275
2019_YH	Y199.1	197.333	24.67	6.7	3.9825	51.925	18.825
2019_YH	Y2.1	213.835	36.8325	9.69	4.665	61.15	27.125
2019_YH	Y200.1	195.67	24.3325	5.95	4.5625	52.725	24.8
2019_YH	Y202.5	186.498	21.1675	6.45	3.3625	43.675	15.95
2019_YH	Y204.1	205.833	29.33	6.75	3.3875	49.675	20.375
2019_YH	Y205.1	199.67	27.7475	8.825	5.225	55.025	26.2
2019_YH	Y206.1	221.085	25.3325	6.475	4.3875	50.05	21.2
2019_YH	Y207.1	184.67	23.165	6.725	4.425	47.575	16.55
2019_YH	Y208.1	190.585	23.08	6.3	4.1375	53.3	22.4
2019_YH	Y209.5	156.67	20.67	6.575	4.1875	43.575	17.5
2019_YH	Y210.1	173.333	25.2525	6.85	3.85	47.75	20.25
2019_YH	Y211.1	168.748	23.2525	6.675	3.7875	46.3	17.15
2019_YH	Y212.1	143.998	24.2475	5.85	3.575	50.85	22.5
2019_YH	Y213.1	170.998	24.3325	5.4	4.025	49.075	21.45
2019_YH	Y214.1	177.335	22.5825	5.8	4.2025	52.175	17.725
2019_YH	Y215.1	175.083	24.5	5.975	3.1	47.1	20.7
2019_YH	Y217.1	166.252	23.2475	5.475	4.05	49.075	23.125
2019_YH	Y218.1	170.583	23.8325	6.15	3.5	55.85	20.95
2019_YH	Y219.1	191.667	24.9975	9.675	6.045	51.85	24.15
2019_YH	Y22.1	155.377	22.125	6.775	3.4875	52.5	24.25
2019_YH	Y221.1	170.665	24.7525	9.6	4.0925	55.175	22.575
2019_YH	Y222.1	182.752	23.5	5.9	3.775	51.15	22.05
2019_YH	Y223.1	192.333	24.915	8.6	4.2825	62.5	24.4
2019_YH	Y224.1	162.502	26.7525	10.9	5.545	61.3	22.95
2019_YH	Y226.1	163.67	27.4975	8.625	5.0875	55.45	17.95
2019_YH	Y227.1	161.833	26.335	7.175	3.875	57.775	26.925
2019_YH	Y228.1	133.83	22.165	6.425	2.6875	49.1	20.55
2019_YH	Y23.1	181.752	24.085	8.2	4.3	53.25	27.05
2019_YH	Y230.1	184	21.0025	7.075	3.4375	43.5	13.5
2019_YH	Y232.1	169.17	25.9975	10.425	3.49	70.4	23.225
2019_YH	Y233.1	190.252	25.75	6.975	3.45	46.7	16.025
2019_YH	Y234.1	194.915	25.08	7.5	5.175	52.5	23.625
2019_YH	Y235.1	201.42	23.7475	7.275	4.395	46.965	20.425
2019_YH	Y236.1	201.92	27.585	7.95	4.5	47.25	25.375
2019_YH	Y237.1	182.002	24.33	6.9	3.6125	51.175	20.75
2019_YH	Y238.1	226.498	25.08	7.125	4.375	57	28.125
2019_YH	Y239.1	190.42	23.665	6.975	4.225	47.75	24.75
2019_YH	Y24.1	233.71	33.2525	9.55	4.475	57.825	27.125
2019_YH	Y240.1	177.083	24.67	6.975	3.65	46.25	22
2019_YH	Y241.1	189.165	27.2475	7	3.94	49.375	20.65
2019_YH	Y242.1	216.665	26.17	6.95	4.025	46.25	26.25
2019_YH	Y244.1	172.917	24.4975	6.675	3.825	52.25	24
2019_YH	Y245.1	190.835	28.165	7.1	3.975	48	20.5
2019_YH	Y246.1	184.335	31.2475	6.825	4.025	53.75	24.75
2019_YH	Y247.1	192.835	25.9175	6.675	4	48.25	23
2019_YH	Y248.1	173.165	24.42	7.5	3.325	56.025	21.325
2019_YH	Y25.1	172.5	23.83	7.5	4.355	61.9	29.075
2019_YH	Y250.1	184.498	22.9175	6.525	4.2125	58.425	24.8
2019_YH	Y251.1	218.667	28.9975	5.925	4.735	49.425	19.725
2019_YH	Y252.2	216.25	27.335	7.825	4.5375	52.8	26.2
2019_YH	Y253.1	206.998	26.4975	7.75	4.7375	59.375	28.925
2019_YH	Y254.1	169.083	23.5825	7.125	4.4	54.075	22.125
2019_YH	Y255.1	175.502	30.58	9.775	4.4625	68.5	27.15
2019_YH	Y257.1	187	23.33	6.625	4.275	53.125	22.75
2019_YH	Y26.1	175.248	28.5	9.75	4.8275	61.025	28.95
2019_YH	Y260.1	183.085	27.0025	6.55	4.525	54.9	22.375
2019_YH	Y262.1	199.915	26.4175	6.2	4.3625	55.55	22.725
2019_YH	Y263.1	184.25	28.1675	6.925	4.275	52.85	22.075
2019_YH	Y264.1	184.252	25.915	6.15	5.22	54.075	22.625
2019_YH	Y265.1	198.08	35.6675	8.65	4.7575	56.175	25.225
2019_YH	Y266.1	206.585	31.0025	7.1	4.465	55.6	21.275
2019_YH	Y267.2	165.085	30.3325	9.3	3.945	58.85	21.575
2019_YH	Y268.1	197	27.9175	8.575	3.8675	55.75	22.5
2019_YH	Y269.1	208.33	32.67	7.025	4.2625	59.075	23.1
2019_YH	Y271.1	192.33	32.7475	8.83	3.8225	64.35	25.375
2019_YH	Y272.1	194.915	24.58	8	4.3	56.9	23.55
2019_YH	Y273.1	194.92	24.335	7.375	3.92	46.275	19.2
2019_YH	Y274.1	184.83	24.585	6.875	3.7	55.7	21.175
2019_YH	Y275.1	205.502	25.7525	6.675	4.2775	53.25	21.025
2019_YH	Y276.1	215.67	24.5025	6.975	4.0125	49.6	20.875
2019_YH	Y277.1	173.917	24.92	5.65	3.5	44.925	18.575
2019_YH	Y278.1	275	38.67	7.825	4.0625	50.35	24.75
2019_YH	Y279.1	168.085	26.7475	9.025	4.015	55.7	25.55
2019_YH	Y281.1	173.92	33.5	9.8	4.145	54.75	22.8
2019_YH	Y284.1	178.583	25.3325	7.6	4.3375	55.925	22.5
2019_YH	Y285.1	159.752	25.665	6.125	3.1125	46.075	24.275
2019_YH	Y287.1	224.833	37.375	9.2	4.785	53.25	20.55
2019_YH	Y288.1	193.083	26.4175	7.85	4.3125	58.925	23.725
2019_YH	Y289.1	177.165	34.665	9.65	4.1375	56.775	20.025
2019_YH	Y29.1	183.502	23.915	7.35	4.7875	60.5	25.825
2019_YH	Y290.1	196.002	31.2475	6.925	5.25	55.4	27.675
2019_YH	Y291.1	172.417	26.1675	7.55	3.8875	54.175	24.025
2019_YH	Y292.1	149.75	24.25	5.775	3.05	49.9	16.7
2019_YH	Y293.1	150.915	28.92	7.875	4.3125	61.275	25.325
2019_YH	Y294.1	139	31.33	8.6	3.275	59.475	21.925
2019_YH	Y296.1	172.085	25.0025	7.975	5.7	56.675	23.65
2019_YH	Y299.1	177.333	31.7525	8.1	4.575	61.325	28.375
2019_YH	Y3.1	190.748	30.17	8.9	4.2325	66.175	27.325
2019_YH	Y30.1	176.58	23.75	6.9	3.7175	57.75	24.55
2019_YH	Y300.1	184.25	34.915	8.375	4.5	58.375	23.35
2019_YH	Y303.1	187.5	24.92	8.25	5.74	62.575	25.375
2019_YH	Y305.1	154	23.915	8.075	5.2375	50.75	27.175
2019_YH	Y306.1	198.58	31.42	9.95	5.3775	61.125	26.8
2019_YH	Y307.1	165.252	24.17	7.825	4.2875	57.95	22.5
2019_YH	Y308.1	193.583	24.8325	6.6	4.3375	50.8	18.3
2019_YH	Y309.1	179.665	26.0025	6.825	4.675	55.975	24.625
2019_YH	Y31.1	165.67	21.5425	6.3	3.825	53.175	22.7
2019_YH	Y310.1	177.92	30.4175	8.75	3.22	55.3	18.275
2019_YH	Y311.1	160.58	27.585	9.45	3.9125	57.9	24.825
2019_YH	Y313.1	153.623	25.8725	7.475	4.15	56.575	19.475
2019_YH	Y315.1	189.502	33.6675	9.725	5.1675	57.625	21.95
2019_YH	Y316.1	166.33	29.0825	10.725	4.4675	66.425	26.2
2019_YH	Y317.1	174.33	28	8.775	4.4875	59.4	24.225
2019_YH	Y318.1	222.248	28.7525	8.075	5.585	54.425	27.5
2019_YH	Y319.1	178.665	29.08	7.875	5.1875	64.925	27.125
2019_YH	Y32.1	171.167	24.3325	8.875	3.92	59.95	22.575
2019_YH	Y320.1	156.748	24.58	8.1	4.275	59.075	21.6
2019_YH	Y321.1	211.665	28.7475	7.7	5.7175	54.25	26.2
2019_YH	Y322.1	170.835	32.3325	7.45	3.85	63.15	25.275
2019_YH	Y326.1	153.415	30.6675	9.175	3.9675	57.1	23.15
2019_YH	Y327.1	170.167	25.33	8.575	4.7125	62.9	27.2
2019_YH	Y328.1	158.252	27.2475	8.45	4.55	60	22
2019_YH	Y329.1	174.998	24.75	7.425	4.7	59.225	25.075
2019_YH	Y33.1	184.165	31.54	9.95	4.4375	58.05	27.175
2019_YH	Y330.1	168.498	30.2475	8.45	3.6	61.825	24.175
2019_YH	Y331.1	187.002	25.7525	8.5	4.525	58	24.925
2019_YH	Y333.1	187.17	27.5825	8.625	4.65	53.175	25.925
2019_YH	Y335.1	205.415	28.0825	7.65	5.0125	55.2	24.625
2019_YH	Y338.1	182.083	24.33	7.55	4.4125	53.95	24.25
2019_YH	Y339.1	213.33	33	7.6	4.0225	54	24.675
2019_YH	Y34.1	160.25	25.335	10.125	3.79	64.85	28.825
2019_YH	Y340.1	156.75	30.415	8.275	3.91	60.375	25.1475
2019_YH	Y341.1	144.917	25.83	8.2	3.8575	53.075	18.575
2019_YH	Y343.1	148.752	28.835	7.625	3.965	59.025	21.825
2019_YH	Y344.1	145.502	30.92	9.575	3.6875	64.65	21.5
2019_YH	Y345.1	194.17	26.67	8.95	4.46	62.725	26.325
2019_YH	Y346.1	225	31.67	8.3	5.63	60.3	27.025
2019_YH	Y349.1	179.915	31.42	9.025	5.14	60.1	20.975
2019_YH	Y35.1	148.915	21.33	5.95	3.825	57.225	22.675
2019_YH	Y355.1	184	24.585	7.5	5.375	63.2	22.125
2019_YH	Y356.1	178.917	28.83	9.075	4.465	56	26.275
2019_YH	Y357.1	188.42	30.335	10.725	5.23	62.425	26.775
2019_YH	Y358.1	153.67	38.33	9.45	4.2875	60.725	22.3
2019_YH	Y359.2	178.25	24.67	7.425	4.71	52.25	22.125
2019_YH	Y36.1	176.25	23.5825	7	3.98	56.8975	25.3
2019_YH	Y360.1	177.083	32.585	9.125	5.2625	54.325	23.2
2019_YH	Y361.1	173.498	27.085	8.025	4.355	54.475	20.625
2019_YH	Y363.1	135.083	25.8325	8.975	3.8275	59.925	19.8
2019_YH	Y366.5	153.67	27.33	8.975	3.7375	57.55	22.575
2019_YH	Y367.1	158.17	30.08	9.425	3.805	60.65	21.75
2019_YH	Y368.1	137.75	26.2525	.	.	.	.
2019_YH	Y37.1	196.585	26	6.1	4.255	44.025	21.875
2019_YH	Y370.1	185.67	26.0825	7.5	3.8975	55.675	20.1
2019_YH	Y372.5	196.58	24.75	7.475	3.68	54.25	20.325
2019_YH	Y373.2	168.67	31.75	8.9	3.975	55.6	17.775
2019_YH	Y374.1	213.083	36.165	9.9	4.625	52.625	21.4
2019_YH	Y376.1	210.252	29.085	8.85	4.2125	56.425	23.8
2019_YH	Y378.1	135.67	29.0825	8.025	3.875	57.55	20.725
2019_YH	Y38.1	185	30	8.75	3.715	60.9	25.725
2019_YH	Y380.1	228.165	30.25	10.05	4.65	61.45	29.075
2019_YH	Y382.1	200.915	27.08	7.95	4.5	54.675	23.325
2019_YH	Y383.1	256.545	36.045	9.55	5.1	58.975	25.6
2019_YH	Y384.5	179.083	28.335	10.3	4.475	54.3	19.075
2019_YH	Y386.1	209.083	26.58	7.65	4.295	52.325	24
2019_YH	Y387.1	210.627	35.665	9.375	3.625	54.575	20.725
2019_YH	Y388.5	130	28.67	10	3.85	57.1	21.4
2019_YH	Y389.1	186.415	23.67	7.175	4.405	53.125	22.9
2019_YH	Y39.1	151.67	25.33	6.15	3.0125	45.575	20
2019_YH	Y40.1	138.67	26.33	6.6	2.9	48.65	20.6
2019_YH	Y41.1	157.665	21.5	7.525	4.15	58.825	24.2
2019_YH	Y42.1	177.915	22.58	7.775	3.95	54.45	25.15
2019_YH	Y43.1	186.67	31.33	9.275	3.5725	56.825	22.5
2019_YH	Y44.1	162.085	21.6275	7.2	3.975	58.65	24.45
2019_YH	Y46.1	210.373	35.625	9.225	4.4825	57.775	30.375
2019_YH	Y48.1	187.417	23	7.675	4.5	58.45	26.725
2019_YH	Y49.1	152.08	23.6675	5.075	2.6425	42.5	15.6
2019_YH	Y5.1	172.42	26.0025	6.45	3.2625	57.375	23.225
2019_YH	Y51.1	171.58	28.915	9.8	3.9125	60.6	24.475
2019_YH	Y53.1	195.877	30.2075	9.05	4.485	50.825	24.725
2019_YH	Y55.1	186.417	23.2475	8.1	4.65	58.375	24.225
2019_YH	Y56.1	168.333	24.58	8.65	4.2625	54.425	27.975
2019_YH	Y57.1	164.955	24.1225	7.45	4.2125	56	24.8
2019_YH	Y58.1	214.5	25.165	9.15	4.7	60.825	28.1
2019_YH	Y59.1	186.665	24.0425	8.425	4.2625	54.05	26.05
2019_YH	Y6.1	197.92	23.7525	7.85	5.15	61.175	31.075
2019_YH	Y60.1	176.373	46.67	7.8	4.4775	54.775	25.45
2019_YH	Y61.1	187.83	24.7075	7.95	4.7875	52.35	28.75
2019_YH	Y63.1	184.955	25.75	8.325	3.7625	59.975	24.2
2019_YH	Y64.1	196.04	31.33	10.95	4.84	72.65	28.5
2019_YH	Y65.1	172.248	25.5	8.15	4.1625	63.125	27
2019_YH	Y66.1	201.417	24.335	7.15	4.525	50.625	22.475
2019_YH	Y67.2	242.873	39.295	10.675	4.12	63.875	27.175
2019_YH	Y68.1	177.123	25.25	8.125	4.1	55.175	25.475
2019_YH	Y7.1	167.915	28.17	7.85	4.435	55.425	20.6
2019_YH	Y70.5	173.5	24.5025	7.55	3.7375	55.025	21
2019_YH	Y71.1	189.748	25.25	7.4	4.5625	55.05	22.65
2019_YH	Y72.1	226.248	26.5	7.65	5.725	57.85	30.4
2019_YH	Y73.1	155.752	24.625	6.7	3.725	56.725	24.9
2019_YH	Y74.1	183	24.0025	8.1	4.075	58.075	23.25
2019_YH	Y75.2	194.498	25.58	7.45	5.125	56.4	31.85
2019_YH	Y78.1	173.833	21.5025	7.4	4.275	56.125	24.7
2019_YH	Y8.1	191.665	27.8325	9.625	4.48	69.275	25.825
2019_YH	Y81.1	187.585	28.5825	8.95	5.3325	66.3	29.05
2019_YH	Y83.1	176.123	33.7475	9.9	3.9575	68.1	26.35
2019_YH	Y86.1	243.08	23.5025	7.65	5.8875	52.75	23.95
2019_YH	Y88.1	184.998	29.585	8.425	5.04	57.95	26.15
2019_YH	Y89.1	177.085	23.9175	6.875	4.825	54	24.4
2019_YH	Y9.1	227.667	33.835	9.3	3.675	61.45	24.55
2019_YH	Y91.1	171.792	34.04	9.2	3.47	58.325	24.25
2019_YH	Y92.1	222.165	27.33	8.075	4.5125	52.725	24.4
2019_YH	Y93.1	219.585	25.5825	7.55	5.8375	54.35	30
2019_YH	Y94.1	197.417	24.415	8.3	4.775	64.275	25.7
2019_YH	Y96.1	186.33	23.5825	7.6	4.5875	62.9	23.825
2019_YH	Y97.1	189.083	23.835	8.025	4.4125	59.525	25.675
2019_YH	Y98.1	205	27.67	8.475	4.675	61.6	26.925
2019_YH	Y99.1	204.33	30.585	9.375	4.7375	64.45	27.45
2020_YH	Y1.1	127.2	15.4	10.6	3.08	56.8	28.4
2020_YH	Y10.1	158.2	24.2	9.8	4.08	67.2	30.8
2020_YH	Y103.1	143.6	21.8	8.8	3.24	56.6	25.8
2020_YH	Y106.1	171.2	24.8	10	4.36	66.6	32
2020_YH	Y107.1	166.2	26	9	3.4	59	27.6
2020_YH	Y110.1	167	22.2	8.6	3.48	64.8	26.8
2020_YH	Y111.1	158.4	24	8.8	2.8	68.2	30
2020_YH	Y112.1	153.2	25.4	10.4	3.64	67.6	29.2
2020_YH	Y113.1	157.6	26.2	9.4	3.56	68.6	32.2
2020_YH	Y119.1	190.4	31.2	12	4.12	67.6	33.6
2020_YH	Y12.1	125.8	20.8	9	3.16	57.2	26.4
2020_YH	Y13.1	159.8	24.4	10.6	4.6	74.4	35.2
2020_YH	Y132.1	154.4	22.6	10.6	3.68	74.6	34
2020_YH	Y133.1	133.4	24	11	3.16	62.4	33.4
2020_YH	Y138.1	166.6	25.2	11	3.04	67.2	35.6
2020_YH	Y14.1	176.8	23.4	11.4	3.96	74.8	33.2
2020_YH	Y142.1	168.8	25.6	12.2	3.32	71.8	38.4
2020_YH	Y144.1	146.2	25.4	10.2	3.44	68.8	29.6
2020_YH	Y144.5	146.4	23.4	9.8	3.36	64	29
2020_YH	Y145.1	147.8	20.2	10.4	3.48	65.6	31.4
2020_YH	Y146.1	142.6	21.2	10.2	3.24	73.2	33.6
2020_YH	Y149.1	152.6	21.4	9.4	4	62.4	29.4
2020_YH	Y150.1	141.4	22.6	10.6	3.24	65.6	29.8
2020_YH	Y151.1	156	21	10	3.76	61.2	34.8
2020_YH	Y153.1	143.4	22.6	11	3.44	59.6	35.6
2020_YH	Y159.1	144	24	12	3.24	67.8	33.6
2020_YH	Y161.1	118.6	19.4	10	3.36	71.2	33
2020_YH	Y162.1	177.4	27.4	11.2	3.8	72.4	32.6
2020_YH	Y163.1	174.2	27.4	12.2	3.76	65.4	35.6
2020_YH	Y164.1	178	28	11.4	3.76	64.6	36
2020_YH	Y17.1	185.2	23.6	10	5.52	66	35.8
2020_YH	Y18.1	154.2	22.8	10	4.52	74.4	35.8
2020_YH	Y19.1	168.4	22.8	11.4	3.4	67.6	36.4
2020_YH	Y195.1	150.4	26	11.6	3.28	66.6	32.6
2020_YH	Y196.1	142.4	22.4	10.8	3.68	71.2	29.2
2020_YH	Y197.1	147.2	23.4	11	3.52	75	32.6
2020_YH	Y198.1	160.2	23.8	10.2	4.28	79.4	31.4
2020_YH	Y199.1	164.6	24	8.4	4.64	75.8	27.4
2020_YH	Y200.1	148.5	22.75	8.75	4.3	79.75	41
2020_YH	Y202.1	156	22.4	10.2	3.92	70.2	26.8
2020_YH	Y204.1	145.6	24	12	3.36	66	33
2020_YH	Y205.1	205	35.4	12.4	4.12	65.8	31.8
2020_YH	Y206.1	162	25.4	10.8	4.68	72.8	32.4
2020_YH	Y207.1	144	21.2	8.6	4.2	73.8	32
2020_YH	Y208.1	145	21.4	10.4	3.24	69.6	29.6
2020_YH	Y209.5	143.4	22.2	9	3.66667	54.3333	25.3333
2020_YH	Y210.1	154.6	25.2	10.4	3.16	68.2	30
2020_YH	Y211.1	137.2	21.8	10.2	3.28	67.2	29.8
2020_YH	Y212.1	131.8	22.4	10.2	3.08	65.6	31
2020_YH	Y213.1	135.2	21.4	8	3.88	64.4	27.4
2020_YH	Y214.1	133.8	20.4	9.4	4.08	66.8	29.4
2020_YH	Y215.1	119.8	21.4	9.4	3.88	64.2	28.4
2020_YH	Y217.1	137.4	21.4	9	3.92	66.6	28.8
2020_YH	Y218.1	138.6	20.6	10	4.04	68.6	28.4
2020_YH	Y219.1	162.4	21.8	10.2	4.8	60	32
2020_YH	Y22.1	149.6	20.8	10.4	3.4	65.8	32.2
2020_YH	Y221.1	143.4	22.4	8.8	4.08	59.8	28.6
2020_YH	Y222.1	131.8	21.8	9.6	3.68	68.8	28.4
2020_YH	Y223.1	149.6	25.4	9.2	4.24	62.2	26.4
2020_YH	Y226.1	134.8	31.4	10.2	3.24	61.6	26
2020_YH	Y227.1	144.6	25.2	9.2	3.52	62.4	25.6
2020_YH	Y228.1	118.4	19.8	7.2	2.8	47.4	17.4
2020_YH	Y23.1	170.2	24.6	10.4	4.68	67	36.6
2020_YH	Y230.1	152.6	24	9.2	3.56	70.4	28
2020_YH	Y233.1	139	23.6	9.8	3.52	70.2	28.4
2020_YH	Y234.1	157	23.2	10.8	4.04	65.4	30.8
2020_YH	Y235.1	168.8	22	10.2	4.2	71.4	34.2
2020_YH	Y236.1	158	30.8	11.6	4.04	66.6	34
2020_YH	Y237.1	125.8	21.4	9.8	3.32	79.4	30.6
2020_YH	Y241.1	117.8	18.6	8	3	54.2	20.6
2020_YH	Y244.1	107	20.6	9.2	3.28	72.2	31.2
2020_YH	Y246.1	123.8	22.6	8.6	3.28	68.4	28.6
2020_YH	Y248.1	109.6	19.6	12	3.2	82	40
2020_YH	Y25.1	156.4	22.6	10.6	4.24	74.2	33.2
2020_YH	Y250.1	110.4	20	8	2.68	53	24
2020_YH	Y252.2	127.8	21	10.75	3.1	65.75	34.25
2020_YH	Y254.1	109.6	20.4	9.4	3.16	74.4	24.6
2020_YH	Y260.1	109.2	20.4	8	2.72	60.6	24.8
2020_YH	Y263.1	133.8	24.4	9	3.12	62.4	24.6
2020_YH	Y264.1	134	21.2	8.4	3.16	63.4	25.2
2020_YH	Y268.1	139.4	24.4	9.8	3.08	63.4	26.2
2020_YH	Y272.1	93.2	21	8	3.12	48	21.4
2020_YH	Y273.1	133.6	19.6	9.6	2.8	70.6	29
2020_YH	Y274.1	73	19.4	10.4	3.08	63	28.4
2020_YH	Y275.1	129.6	30.4	10.8	3.04	64.4	30.8
2020_YH	Y284.1	155.8	22.8	10	3.24	60.4	24.4
2020_YH	Y289.1	144	22	10.6	3.16	70	29.8
2020_YH	Y29.1	182	23.6	10.2	3.56	69.4	33.4
2020_YH	Y291.1	102.6	18.2	8.2	2.56	60.2	25
2020_YH	Y292.1	104.5	18.75	10.25	3.3	65.25	28.75
2020_YH	Y296.1	119	19.6	8.4	2.84	52.4	24.4
2020_YH	Y299.1	110.4	29.4	9.8	2.52	50.4	21.6
2020_YH	Y3.1	156.2	31.8	11.8	3.68	62.8	26.6
2020_YH	Y30.1	144.2	23.8	9.6	3.2	68.4	29.4
2020_YH	Y300.1	132	21.4	8.8	2.6	50.2	23
2020_YH	Y303.1	153.4	21.6	9	3.44	61.2	32
2020_YH	Y305.1	146	21	9.2	4.24	59.4	30.4
2020_YH	Y307.1	135.6	21.2	10	3.64	62.6	31
2020_YH	Y309.1	140.6	30.2	11.8	3.04	66	32.4
2020_YH	Y31.1	157	22	9.8	3.84	77.4	32.8
2020_YH	Y310.1	183.8	30.2	9.4	3.36	59.8	28.6
2020_YH	Y311.1	166	32	10.6	3.04	65	25.8
2020_YH	Y315.1	209.4	37.2	10.2	3.32	63.4	32.6
2020_YH	Y316.1	159.2	28.6	8.8	3.6	54.8	24
2020_YH	Y317.1	145.4	29	9	3.4	61	22.4
2020_YH	Y318.1	193.2	28.4	9.6	4.52	58.4	28
2020_YH	Y32.1	153.2	22.4	10	2.96	65.4	26.8
2020_YH	Y327.1	107	20	8.4	2.92	57.4	24.2
2020_YH	Y329.1	118.6	20.4	8.6	3.2	58.6	27.2
2020_YH	Y33.1	167.8	34.6	10.6	3.28	58.8	27.8
2020_YH	Y331.1	126.2	23.2	10	3.52	68.6	26.6
2020_YH	Y338.1	125.2	20.8	9.8	2.84	61.6	28.2
2020_YH	Y34.1	151.2	25.4	9.8	3.92	64.2	27
2020_YH	Y341.1	82.6	11.8	8.8	2.6	54.6	27.4
2020_YH	Y345.1	119.2	19.8	8.8	2.96	57.6	24.8
2020_YH	Y35.1	172.6	23	9.8	3.12	74.6	28.2
2020_YH	Y359.2	108.8	21.6	9.2	3.16	64.2	24
2020_YH	Y36.1	181.4	25.4	10.6	3.32	70.4	30.2
2020_YH	Y361.1	130.8	22.8	9.6	3.24	66.4	25.4
2020_YH	Y363.1	94.4	26.8	9.2	2.6	50.6	22.6
2020_YH	Y37.1	194.8	26.2	9.2	4.56	61.6	32.2
2020_YH	Y370.1	140.8	23.6	10.6	3.36	81.4	26.6
2020_YH	Y372.1	81.4	19.2	10.8	3.04	63.6	29.4
2020_YH	Y376.1	135	25.4	10.2	3.08	64.2	24.8
2020_YH	Y38.1	147.6	31.2	9.6	3.4	58.4	24.6
2020_YH	Y382.1	108	25.6	8.8	2.88	53	23.4
2020_YH	Y386.1	99	24.8	8	3.12	47.4	20.6
2020_YH	Y389.1	104.6	16.4	8.2	3.16	55.8	25.6
2020_YH	Y39.1	134.5	18.75	9	2.55	58	23.75
2020_YH	Y40.1	125.2	18.4	8.6	2.68	60.6	23
2020_YH	Y41.1	151.2	22.6	9.8	3.92	69.8	29
2020_YH	Y42.1	179.6	22.6	10.2	3.72	70.6	27.6
2020_YH	Y43.1	135.4	20.6	9.4	3.68	68.2	29.6
2020_YH	Y44.1	124.4	18.8	8.6	3.44	70	27.4
2020_YH	Y48.1	175.6	25	10.2	3.28	76	32.4
2020_YH	Y5.1	145.4	31	10.8	3.16	63	29.2
2020_YH	Y51.1	134.6	30	9.6	3.4	61.6	26.6
2020_YH	Y55.1	154.6	22.8	10.4	3.8	70.6	27.8
2020_YH	Y56.1	155.4	23.4	10.2	3.84	71.4	35.2
2020_YH	Y57.1	122.6	18	9.6	3.4	66.8	29.6
2020_YH	Y58.1	175.2	22.8	9.4	4.52	63.4	33.2
2020_YH	Y59.1	165.2	21.6	9.6	4	68.8	30.2
2020_YH	Y6.1	171.6	22.6	11	3.96	69.6	34.4
2020_YH	Y60.1	159	21.8	9.8	4.24	60.4	29.6
2020_YH	Y61.1	172	21.8	8.4	4.2	62.6	32.2
2020_YH	Y63.1	150.6	21.6	9.4	3.32	71.8	28.4
2020_YH	Y65.1	134.6	20.8	9.4	3.32	69.4	25.2
2020_YH	Y65.5	148.6	23.8	10.4	3.72	72.8	24.4
2020_YH	Y66.1	144	22.2	9.4	3.8	67	27.8
2020_YH	Y68.1	154.4	24.2	10	4	66.2	29.6
2020_YH	Y70.1	150.2	23.6	9.66667	3.4	68.3333	28
2020_YH	Y70.5	150.4	22.4	8	3.7	70	27.25
2020_YH	Y71.1	157.2	21.4	10	3.4	63.4	28.8
2020_YH	Y72.1	189.4	22.8	10.6	4.32	65.8	34.4
2020_YH	Y73.1	129.6	22	9.6	3.28	74	30
2020_YH	Y73.5	148.6	21.2	10	3.36	67.2	30
2020_YH	Y74.1	154.2	23.8	10.2	3.56	67.4	30.6
2020_YH	Y74.5	122	18.2	9	3.12	62	24.2
2020_YH	Y75.2	165.6	21	10.4	4.96	63	35.8
2020_YH	Y78.1	149.4	22.2	8.4	4.08	66.8	28.2
2020_YH	Y8.1	172.8	32.8	11	3.56	72.6	30.2
2020_YH	Y81.1	172.2	24.2	9.8	4.88	63.2	29.8
2020_YH	Y83.1	161.2	35	10.2	3.6	62.2	23.8
2020_YH	Y86.1	206.8	21.6	9.2	6.2	61	28.2
2020_YH	Y88.1	181.2	27.6	10	4.48	64.8	29.8
2020_YH	Y89.1	144.6	19	9	3.88	66.2	29.8
2020_YH	Y91.1	148	29.2	10.8	3.04	61.8	25.6
2020_YH	Y92.1	179.2	26.2	10.6	4.28	64.6	34.2
2020_YH	Y93.1	189.2	23.2	9.2	4.28	68.4	35.6
2020_YH	Y94.1	172	21.8	10.8	4.16	72.6	32.4
2020_YH	Y96.1	164.25	23.5	10	3.95	80.5	30.75
2020_YH	Y97.1	153.2	28.2	11.2	3.6	70	33.4
2020_YH	Y98.1	153.4	24.4	9	3.2	71.2	27.6
2021_SL	Y1.1	189.6	25.8	10.14	6.26	64.66	28.56
2021_SL	Y2.1	180	28.6	11.04	6.02	79.28	29.08
2021_SL	Y3.1	206.8	29.8	10.28	6.38	70.18	27.92
2021_SL	Y5.1	164	26	8.96	5.04	60.16	33.78
2021_SL	Y6.1	200.6	29.4	9.06	5.82	67.74	35.42
2021_SL	Y7.1	213.4	32.2	10.46	6.12	61.12	27.9
2021_SL	Y8.1	221	30.6	10.1	6.26	67.62	29.7
2021_SL	Y9.1	185.4	29.2	10.68	6.18	67.2	32.08
2021_SL	Y10.1	182.8	27.2	9.72	4.98	66.24	31.94
2021_SL	Y12.1	171.8	27.6	9.06	4.76	68.56	28.8
2021_SL	Y13.1	204.4	27.4	9.88	5.82	71.36	33.54
2021_SL	Y14.1	210.8	28.2	9.34	5.28	73.64	32.76
2021_SL	Y16.1	199.4	30.4	9.24	7.04	68.78	29.26
2021_SL	Y17.1	224.8	30.4	9.68	6.2	65.96	30.26
2021_SL	Y18.1	189	25.2	9.72	5.66	73.18	33
2021_SL	Y19.1	192.4	27	10.3	5.58	64.2	32.9
2021_SL	Y22.1	177	24.8	9.28	5.38	68.88	31.64
2021_SL	Y23.1	172.8	28.2	9.62	4.88	59.96	30.62
2021_SL	Y24.1	234.8	31	10.54	6.28	66.2	31.12
2021_SL	Y25.1	186.8	26	9.26	5.58	69.8	33.34
2021_SL	Y26.1	216.8	31.4	10.04	6.7	72.72	31.94
2021_SL	Y29.1	210	25.4	10.14	5.54	72.62	32.78
2021_SL	Y30.1	191.2	26.6	10.52	4.5	68.72	27.76
2021_SL	Y31.1	166.6	24.4	8.18	5	64.02	26.22
2021_SL	Y32.1	172	27.6	9.2	4.72	66.78	25.76
2021_SL	Y33.1	197	26.8	9.98	6.26	59.78	29.52
2021_SL	Y34.1	186.6	29.6	10.54	6.26	65.06	29.4
2021_SL	Y35.1	189	25.6	9.3	5.18	66.4	27.36
2021_SL	Y36.1	197.6	27.4	9.76	5.4	72.14	31.04
2021_SL	Y37.1	218.6	28.8	9.14	6.84	61.76	30.28
2021_SL	Y38.1	194.8	28.2	11.48	5.8	70.52	33.54
2021_SL	Y39.1	191.6	25.2	10.24	6.2	68.5	31.3
2021_SL	Y40.1	169.2	25.4	9.78	5.58	74.64	27.68
2021_SL	Y41.1	166.8	25.2	8.48	4.6	66.92	28.3
2021_SL	Y42.1	195.4	24	10.02	4.76	65.78	29.5
2021_SL	Y43.1	166	24.2	8.86	4.28	65.36	30.86
2021_SL	Y44.1	169.6	24.6	9.08	8.34	69.7	31.08
2021_SL	Y46.1	210.4	29.4	11.08	5.96	65	33.18
2021_SL	Y48.1	203.4	26.4	9.68	6.44	74.82	33.52
2021_SL	Y49.1	156	26.2	8.16	3.76	60.42	26.72
2021_SL	Y51.1	179.8	27.6	9.86	6.08	72.42	30.72
2021_SL	Y53.1	195.2	27.4	10.66	6.06	64.64	30.4
2021_SL	Y55.1	183.2	27.4	9.74	6.24	70	31.1
2021_SL	Y56.1	171.8	26.2	8.56	6.36	69.06	29.92
2021_SL	Y57.1	170.2	26.4	8.58	5.9	64.16	30.76
2021_SL	Y58.1	192	27.4	9.26	6.54	60.58	30.72
2021_SL	Y59.1	208.2	27.8	9.94	5.92	67.24	31.28
2021_SL	Y60.1	190.6	27.4	9.8	5.88	69.96	31.34
2021_SL	Y61.1	198.2	25.8	9.24	6.42	68.56	30.52
2021_SL	Y63.1	165.6	25.4	8.84	5.74	66.4	26.92
2021_SL	Y64.1	176	27.4	11.96	5.6	82.56	41.14
2021_SL	Y65.1	172.6	25.4	9.84	5.96	74.82	29.62
2021_SL	Y65.5	185	27.6	10.2	5.96	70.9	27.26
2021_SL	Y66.1	198.8	26.4	8.32	6.06	69.5	29
2021_SL	Y67.2	206.2	28.8	11.2	6.3	63.38	31.48
2021_SL	Y68.1	175.2	27.4	8.78	6.1	58.42	25.94
2021_SL	Y70.1	143	26.2	7.42	4.18	64.4	27.38
2021_SL	Y70.5	156	26	7.76	4.18	62.34	26.3
2021_SL	Y71.1	181.2	26.2	9.18	6.1	66.62	26.9
2021_SL	Y72.1	216	28.6	8.88	5.72	57.5	31.6
2021_SL	Y73.1	150.2	26.8	8.2	3.9	59.52	25.96
2021_SL	Y73.5	144	25.2	7.44	4.06	57.74	27.88
2021_SL	Y74.1	165.8	25.2	8.82	4.72	62.58	27.3
2021_SL	Y74.5	188.6	27.4	10.76	5.92	73.52	33.06
2021_SL	Y75.2	194.4	25	10.12	6.18	62.18	35.08
2021_SL	Y78.1	160.8	23.4	7.76	4.84	63.86	27.38
2021_SL	Y81.1	192.6	25	9.9	6.1	63.9	29.16
2021_SL	Y83.1	171	28	10.32	5.66	64.74	26.6
2021_SL	Y86.1	212	22	9.04	6.6	58.58	24.46
2021_SL	Y88.1	208.4	29.8	9.34	6.2	58.12	34.1
2021_SL	Y89.1	188.6	23.2	9.52	6.04	68.16	34.86
2021_SL	Y91.1	168.4	28	11.78	5.44	68.58	30.56
2021_SL	Y92.1	187.4	22.6	8.9	6.28	66.32	27.86
2021_SL	Y93.1	183.2	24.4	9.76	5.66	70.4	31.08
2021_SL	Y94.1	187.6	24.6	10.4	6.16	70.82	31.74
2021_SL	Y96.1	177.4	23.2	8.62	4.74	68.14	29.54
2021_SL	Y97.1	166.4	23.4	9.12	6.08	65.7	28.68
2021_SL	Y98.1	175.4	20.4	9.26	6.32	70.88	31.38
2021_SL	Y99.1	176.8	30.4	10.88	6.06	67.58	28.26
2021_SL	Y100.1	182.4	28.8	11.04	6	67	26.96
2021_SL	Y101.1	163.4	24.2	8.94	6.08	60.2	30.76
2021_SL	Y103.1	158	21.4	9.04	5.96	65.44	31.96
2021_SL	Y106.1	193	22.2	8.66	6.46	62.94	30.76
2021_SL	Y107.1	182	22	9.36	6	53.8	28.62
2021_SL	Y110.1	189.8	20	7.64	5.88	60.4	27.02
2021_SL	Y111.1	166.2	21.8	9.4	6.04	73.06	30.26
2021_SL	Y112.1	178.4	31	10.48	5.98	66.32	32.12
2021_SL	Y113.1	191.6	28.6	9.72	6.1	63.12	29.92
2021_SL	Y115.1	215.6	31.4	10.54	6.52	63.86	34.38
2021_SL	Y118.1	181.6	27.6	11.3	6.38	71.42	33.22
2021_SL	Y119.1	194.4	28.6	9.64	6.42	60.56	30.84
2021_SL	Y121.1	208.2	31.2	10.96	6.02	75.36	30.7
2021_SL	Y123.1	188	30.2	11.78	6.16	69.88	38.52
2021_SL	Y124.1	180	30.4	10.5	5.76	72.72	38.16
2021_SL	Y125.1	188	33.4	11	6.14	72.9	33.8
2021_SL	Y127.1	184.6	31.4	8.86	5.62	71.38	30.74
2021_SL	Y128.1	173	31.6	10.98	5.96	69.86	35.6
2021_SL	Y129.1	193.8	30.6	11.04	6.38	66.64	31.66
2021_SL	Y132.1	185.8	22.6	8.98	6.36	66.34	31.3
2021_SL	Y133.1	164.6	21.4	9.66	5.82	62.8	31.72
2021_SL	Y134.1	192	30	9.94	5.94	65.8	27.1
2021_SL	Y136.1	194.6	29.8	9.98	6.22	71.52	27.84
2021_SL	Y138.1	183.4	22.4	9.56	5.94	62.04	30.02
2021_SL	Y142.1	195.8	21.4	10.08	6.02	63.32	34.48
2021_SL	Y143.1	192.4	30.2	11.86	6.4	73.46	29.24
2021_SL	Y144.1	174.6	21.8	9.6	6.12	66.66	31.94
2021_SL	Y144.5	180.8	22.6	9.76	6.12	64.56	28.98
2021_SL	Y145.1	181.6	23	9.1	6.16	59.28	27.2
2021_SL	Y146.1	172.8	21.8	8.04	6	66.12	27.66
2021_SL	Y147.1	201.2	30.4	11.46	6.08	71.82	31.82
2021_SL	Y149.1	208	21.4	10.32	5.76	74.58	35.8
2021_SL	Y150.1	176.6	21	9.02	6.18	62.74	27.44
2021_SL	Y151.1	199.4	22.4	9.6	5.98	68.6	34.42
2021_SL	Y153.1	205.6	22.6	8.7	6.16	62.52	29.6
2021_SL	Y159.1	200.2	22.4	10.16	6.16	70.94	31.08
2021_SL	Y161.1	162	21.2	8.84	6.1	69.68	29.9
2021_SL	Y162.1	180	23.2	9.66	6.02	68.26	33.12
2021_SL	Y163.1	204	23.4	9.66	6.5	58.2	28.84
2021_SL	Y164.1	226.4	22.8	9.54	6.04	56.96	30.2
2021_SL	Y194.1	232.6	31.8	11.34	6.5	75.72	33.76
2021_SL	Y194.5	227.8	31.2	12.32	6.98	77.78	32.2
2021_SL	Y195.1	201.8	22.6	10.24	6.4	67.74	28.6
2021_SL	Y196.1	171	23.6	9.06	4.86	64.54	29.64
2021_SL	Y197.1	168.2	25	9.52	4.52	73.5	30.96
2021_SL	Y198.1	201.4	21.4	9.28	6.16	72.46	29.24
2021_SL	Y199.1	206.2	21.6	9.52	6.18	74.18	31.58
2021_SL	Y200.1	209.4	21.6	8.68	6.24	65.12	32.56
2021_SL	Y202.1	182	24.4	8.4	5.02	73.76	29.74
2021_SL	Y202.5	182.8	22	9.2	6.4	77.14	26.64
2021_SL	Y204.1	185.2	21.8	10.8	6.24	69.52	29.3
2021_SL	Y205.1	219.4	25.6	9.8	6.2	75.16	29.26
2021_SL	Y206.1	223.4	23.6	9.68	6.28	70.76	32.68
2021_SL	Y207.1	199.6	23	9.5	6.24	75.36	27.92
2021_SL	Y208.1	193.6	23	10.42	6.08	81.66	34.64
2021_SL	Y208.5	190.6	22.2	9.34	6.24	66.9	30.08
2021_SL	Y209.5	193.6	24	9.2	5.02	69.86	32.88
2021_SL	Y210.1	185.6	29.2	9.38	4.2	70.22	29.34
2021_SL	Y211.1	179.4	24.8	8.22	5.14	72.2	29.92
2021_SL	Y212.1	179.8	26.8	8.74	5.02	68.28	31
2021_SL	Y213.1	218.4	28.2	9.54	5.84	69.46	28.84
2021_SL	Y214.1	205.8	27.8	9.26	5.68	71.4	28.5
2021_SL	Y215.1	160.4	25.8	10.44	4.84	65.38	30.16
2021_SL	Y217.1	204	26.6	10.72	5.94	68.8	34.24
2021_SL	Y218.1	177	23	9.64	5.46	64.92	27.16
2021_SL	Y219.1	238	24.2	9.98	6	60.98	35.14
2021_SL	Y221.1	183	26.4	8.62	5.34	71.82	33.88
2021_SL	Y222.1	172.6	25	8.78	4.9	70.78	33.92
2021_SL	Y223.1	193	26.2	9.2	5.36	71.56	35.7
2021_SL	Y224.1	229.4	24.8	10.22	6.06	68.58	26.8
2021_SL	Y226.1	205.2	23.4	10.14	5.96	69.68	25.96
2021_SL	Y227.1	184.4	26.8	8.44	5.9	70.42	26.98
2021_SL	Y228.1	177.2	24.6	8.92	5.34	69.26	26.18
2021_SL	Y230.1	207.6	26.4	8.74	5.34	76.56	29.18
2021_SL	Y232.1	218.6	24.6	10.52	6.12	73	27.16
2021_SL	Y233.1	197.8	25.6	9.14	5.92	71.04	30.4
2021_SL	Y234.1	187.8	25.4	9.42	5.82	60.28	30.66
2021_SL	Y235.1	202.4	24.6	8.8	6.44	65.1	32.76
2021_SL	Y236.1	219.8	22.4	9.04	6.32	63.88	31.02
2021_SL	Y237.1	176.8	26.4	8.62	5.4	69.64	31.2
2021_SL	Y238.1	196.2	26	9.1	6.38	71.42	33.22
2021_SL	Y239.1	203.2	24.8	9.28	7.58	66.68	33.64
2021_SL	Y240.1	188	25.4	8.96	5.5	71.04	28.58
2021_SL	Y241.1	195.2	23.6	8.46	5.32	73.96	33.6
2021_SL	Y242.1	215.8	26.4	9.9	5.94	66.6	36.46
2021_SL	Y244.1	176.4	26.2	8.88	5.36	69.72	31.5
2021_SL	Y245.1	219	23.2	9.34	6.14	69.92	28.84
2021_SL	Y246.1	198.4	28.6	10.36	5.18	71.12	31.42
2021_SL	Y247.1	205	28	9.44	4.98	70.82	34.04
2021_SL	Y248.1	171	23.6	9.64	5.1	69.86	34.24
2021_SL	Y250.1	179	24.4	9.88	4.92	70.4	35.14
2021_SL	Y251.1	223.8	23	9.78	6.36	69.08	31.46
2021_SL	Y252.2	241	24	9.62	6.64	68.44	28.84
2021_SL	Y253.1	220.4	23	9.4	6.18	66.02	30.76
2021_SL	Y254.1	184.2	25.2	10.06	4.62	75	32.46
2021_SL	Y255.1	219	23.2	10.34	6.22	75.88	33.18
2021_SL	Y257.1	197.2	25.8	9.64	6.24	64.18	35.64
2021_SL	Y260.1	202.4	28	9.8	5.2	75.34	36.48
2021_SL	Y262.1	211.8	27	9.14	4.82	69.86	31.08
2021_SL	Y263.1	177.2	28.2	9.82	4.92	64.44	30.56
2021_SL	Y264.1	214.4	28.6	10.34	5.52	69.94	31.56
2021_SL	Y265.1	240.6	33.4	11.34	6.78	67.1	29.36
2021_SL	Y266.1	226.4	23.2	9.76	6.26	71.06	30.68
2021_SL	Y267.2	222.8	26	10	5.92	71.12	30.7
2021_SL	Y268.1	213.6	28.2	10.56	4.62	71.34	33.18
2021_SL	Y269.1	236.4	31.2	10.56	4.62	71.36	33.16
2021_SL	Y271.1	218.2	24.2	10.74	6.02	71.16	30.42
2021_SL	Y272.1	202.2	23.2	9.78	5.66	78.6	39.36
2021_SL	Y273.1	206.4	22.6	10.18	6.38	70.8	35.4
2021_SL	Y274.1	179.6	24.8	9.66	4.78	66.94	30.42
2021_SL	Y275.1	220.8	27.4	9.58	5.6	66.8	28.2
2021_SL	Y276.1	206.6	24.2	9.62	5.42	69.68	30.24
2021_SL	Y277.1	175.4	25	9.72	5.26	69.86	30.98
2021_SL	Y278.1	245.8	35.2	11.56	6.38	66.76	30.56
2021_SL	Y279.1	222.8	24	9.28	5.94	66.86	28.52
2021_SL	Y281.1	247.2	35	12	5.78	65.54	27.92
2021_SL	Y284.1	188.6	25.2	9.82	5.24	66.66	27.64
2021_SL	Y285.1	196.8	25.6	11.62	4.84	62.92	33.3
2021_SL	Y287.1	227.4	33.8	12	5.54	70.82	33.52
2021_SL	Y288.1	184.2	27.4	9.54	5.74	57.38	25.64
2021_SL	Y289.1	160.8	26.2	9.18	5.52	64.7	30.2
2021_SL	Y290.1	193.2	25.8	10.74	5.34	63.98	32.94
2021_SL	Y291.1	177.2	24.2	9.9	5.52	58.82	28.26
2021_SL	Y292.1	152	18.6	8.92	5.18	70.06	26.72
2021_SL	Y293.1	155	23.6	10.04	5.88	56.48	26.16
2021_SL	Y294.1	174.6	27.8	10.22	5.86	60.22	26.66
2021_SL	Y296.1	182.2	23.8	9.92	5.8	75.98	31.04
2021_SL	Y299.1	222.8	27.8	9.96	5.9	68.16	29.26
2021_SL	Y300.1	161.4	22.8	9.54	5.58	77.2	33.02
2021_SL	Y303.1	208	22.4	9.54	6.26	79.22	33.1
2021_SL	Y305.1	157.2	21.8	9.56	6.38	71.18	29.96
2021_SL	Y306.1	205.4	29.8	10.8	6.24	66.86	34.46
2021_SL	Y307.1	169.6	22	8.46	6.74	74.82	28.96
2021_SL	Y308.1	173.4	22.8	9.46	6.14	80.82	29.26
2021_SL	Y309.1	168	23.4	9.74	5.78	77.16	28.42
2021_SL	Y310.1	166.4	27.8	10.4	5.8	65.34	28.54
2021_SL	Y311.1	159.6	23.2	9.24	5.34	67.94	27.22
2021_SL	Y313.1	173.4	25	9.74	5.56	65.32	29.4
2021_SL	Y313.5	168	23	9.38	5.18	68.68	22.9
2021_SL	Y315.1	193.2	30.6	10.08	5.8	64.2	32.36
2021_SL	Y316.1	213	32.8	10.6	5.88	69.52	34.74
2021_SL	Y317.1	186.8	24.4	10.2	5.1	80.6	27.24
2021_SL	Y318.1	218.8	27.4	10.4	5.9	63.38	31.78
2021_SL	Y319.1	197.2	31	11.06	6.14	70.86	26.66
2021_SL	Y320.1	170.8	24.6	10.34	5.24	65.24	25
2021_SL	Y321.1	190.4	24.8	10.62	5.52	61.96	36.64
2021_SL	Y322.1	177.6	23.6	10	5.4	76.12	26.94
2021_SL	Y326.1	204	27.6	11.94	6.06	71.22	30.24
2021_SL	Y327.1	189.4	21.4	9.58	5.5	74.14	29.1
2021_SL	Y328.1	183.8	23.4	9.36	5.12	74.32	27.08
2021_SL	Y329.1	182.2	22.8	9.4	5.36	67.1	26.42
2021_SL	Y330.1	182.6	23.8	9.84	4.96	62.5	23.5
2021_SL	Y331.1	183.6	23.8	10.2	4.92	62.46	23.1
2021_SL	Y333.1	205.4	22.2	10.28	5.16	73.98	24.86
2021_SL	Y335.1	178	22.8	9.68	5.3	82.36	33.6
2021_SL	Y338.1	181.8	23.2	9.42	5.12	74.92	25.48
2021_SL	Y339.1	219	29.2	9.94	5.98	65.86	30.14
2021_SL	Y340.1	186.2	24.4	9.78	5.32	76.44	24.78
2021_SL	Y341.1	193.4	23.6	10.1	5.4	75.9	25.16
2021_SL	Y343.1	187.6	22.2	9.48	5.86	73.36	29.5
2021_SL	Y344.1	193.8	31.8	10.68	5.4	70.92	29
2021_SL	Y345.1	187.6	22	9.48	5.8	74.88	25.9
2021_SL	Y346.1	207.2	34.6	10.4	5.58	67.26	30.44
2021_SL	Y349.1	194.6	23.8	10.02	6.06	76.04	25.72
2021_SL	Y355.1	186.6	22.8	8.84	7.16	66.2	23.06
2021_SL	Y356.1	224	33.2	10.62	5.94	64.9	30.06
2021_SL	Y357.1	246.4	33.4	9.22	5.92	70.2	31.92
2021_SL	Y358.1	173.2	31.2	10.48	5.96	66.4	27.96
2021_SL	Y359.2	175.6	24	9.22	5.22	65.44	23.02
2021_SL	Y360.1	218.6	31.6	10.44	5.3	61.68	27.36
2021_SL	Y361.1	190.2	22.8	9.2	6.24	66.1	22.48
2021_SL	Y363.1	187	32.2	11.18	5.48	75.98	31.42
2021_SL	Y366.5	227.8	33.6	10.96	5.46	71.04	31.92
2021_SL	Y367.1	201.6	31.2	9.86	6.08	69.2	30.74
2021_SL	Y370.1	176.8	23.6	9.02	5.72	76.1	23.82
2021_SL	Y372.1	195.2	22.8	8.94	4.88	78.06	30.12
2021_SL	Y372.5	180.2	23.2	8.72	4.86	70.84	30.3
2021_SL	Y373.2	192	24.4	9.48	5.64	77.3	33.8
2021_SL	Y374.1	176.8	24.8	8.78	5.48	69.9	28.48
2021_SL	Y376.1	188.8	23.2	8.68	4.86	74.22	33.18
2021_SL	Y378.1	171	28.6	8.84	5.42	66.38	26.34
2021_SL	Y380.1	217	31.2	10.4	6	64.62	30.12
2021_SL	Y382.1	188.4	23.6	8.88	5.52	67.34	29.04
2021_SL	Y383.1	185.6	24	9.48	5.6	67.48	30.28
2021_SL	Y384.5	201.6	31.6	8.1	6.14	63.3	25.64
2021_SL	Y386.1	211.8	26.8	9.04	6.18	66.3	29.24
2021_SL	Y387.1	189	28.8	11.6	6.18	64.42	27.06
2021_SL	Y388.5	161	26.8	8.24	6.12	61.62	24.4
2021_SL	Y389.1	175.8	22.8	8.54	6.34	66.32	26.98
